# Supplementary material for: Leptin Stimulates Cellular Glycolysis Through a STAT3 Dependent Mechanism in Tilapia
Source: Front Endocrinol (Lausanne). 2018 Aug 21;9:465. doi: 10.3389/fendo.2018.00465 (PMC6110908; doi:10.3389/fendo.2018.00465)
Supplement: Supplemental Table 5 — CuffDiff output. [file Table_5.XLSX]

## Sheet: gene_exp
Supplemtnal Table 5: CuffDiff Output
Legend
Column Header	Description
test_id	Ensemble Gene ID
gene_id	Ensemble Gene ID
gene	Universal gene name as designated within ENSEMBLE ("-" represents an unknown gene)
locus	Gene locus as designated by ENSEMBLE genome
sample_1	Sample i.d. for control group, q1
sample_2	Sample i.d. for control group, q2
status	Status of between group comparison
value_1	Average FPKM for the control group
value_2	Average FPKM for the leptin treated group
log2(fold_change)	Fold change in gene expression for leptin treatment compared to control
test_stat	F-statistic
p_value	Non-adjusted p-value
q_value	Benjamini-Hochenberg FDR adjusted p-value
significant	Is q-value < 0.05
test_id	gene_id	gene	locus	sample_1	sample_2	status	value_1	value_2	log2(fold_change)	test_stat	p_value	q_value	significant
ENSONIG00000000001	ENSONIG00000000001	PPFIBP1 (2 of 2)	GL831243.1:195804-234623	q1	q2	OK	9.92656	12.6291	0.347392	2.0094	0.0006	0.00341175	yes
ENSONIG00000000002	ENSONIG00000000002	CYB5R3	GL831243.1:195804-234623	q1	q2	OK	20.667	15.8006	-0.387357	-1.08281	0.0641	0.146378	no
ENSONIG00000000003	ENSONIG00000000003	SYT1	GL831243.1:237232-296029	q1	q2	OK	37.412	45.3869	0.278773	2.89495	5e-05	0.000373456	yes
ENSONIG00000000004	ENSONIG00000000004	PAWR	GL831243.1:475958-543538	q1	q2	NOTEST	2.68638	2.17632	-0.303776	0	1	1	no
ENSONIG00000000005	ENSONIG00000000005	PPP1R12A	GL831243.1:558165-615914	q1	q2	OK	2.08522	5.13281	1.29955	2.72675	5e-05	0.000373456	yes
ENSONIG00000000006	ENSONIG00000000006	RPS16	GL831243.1:653138-656057	q1	q2	OK	943.12	1306.92	0.470654	6.14753	5e-05	0.000373456	yes
ENSONIG00000000007	ENSONIG00000000007	MYF6	GL831243.1:697392-699565	q1	q2	NOTEST	0	0	0	0	1	1	no
ENSONIG00000000008	ENSONIG00000000008	GUCA1A	GL831243.1:2151992-2156712	q1	q2	NOTEST	0	0	0	0	1	1	no
ENSONIG00000000009	ENSONIG00000000009	GOLGB1	GL831243.1:2162662-2175369	q1	q2	NOTEST	2.25233	1.89354	-0.25033	0	1	1	no
ENSONIG00000000010	ENSONIG00000000010	HCLS1	GL831243.1:2181655-2197855	q1	q2	NOTEST	1.94441	1.70415	-0.190277	0	1	1	no
ENSONIG00000000011	ENSONIG00000000011	LLPH	GL831243.1:2181655-2197855	q1	q2	OK	10.7871	10.6924	-0.012726	-0.0259597	0.97605	0.981199	no
ENSONIG00000000012	ENSONIG00000000012	PEX26	GL831243.1:2181655-2197855	q1	q2	NOTEST	0	0	0	0	1	1	no
ENSONIG00000000013	ENSONIG00000000013	USP18	GL831243.1:2199758-2208790	q1	q2	NOTEST	2.27174	2.81163	0.307609	0	1	1	no
ENSONIG00000000014	ENSONIG00000000014	CCND2 (2 of 2)	GL831243.1:2243067-2258693	q1	q2	NOTEST	4.09066	2.92822	-0.48231	0	1	1	no
ENSONIG00000000015	ENSONIG00000000015	C12orf5 (1 of 2)	GL831243.1:2304270-2309272	q1	q2	NOTEST	2.83181	1.05339	-1.42668	0	1	1	no
ENSONIG00000000016	ENSONIG00000000016	FGF23	GL831243.1:2311992-2314957	q1	q2	NOTEST	0	0	0	0	1	1	no
ENSONIG00000000017	ENSONIG00000000017	FGF6 (2 of 2)	GL831243.1:2315908-2322511	q1	q2	NOTEST	0.0339883	0	#NAME?	0	1	1	no
ENSONIG00000000018	ENSONIG00000000018	GALNT8 (2 of 5)	GL831243.1:2348119-2363923	q1	q2	NOTEST	0	0.101778	inf	0	1	1	no
ENSONIG00000000019	ENSONIG00000000019	-	GL831280.1:2152-29592	q1	q2	OK	7.72699	14.2192	0.879865	4.10568	5e-05	0.000373456	yes
ENSONIG00000000020	ENSONIG00000000020	CECR1 (1 of 2)	GL831243.1:2348119-2363923	q1	q2	NOTEST	0.0616596	0.324582	2.39618	0	1	1	no
ENSONIG00000000021	ENSONIG00000000021	-	GL831243.1:2365374-2376212	q1	q2	OK	9.48042	9.26611	-0.0329873	-0.0500763	0.94725	0.967232	no
ENSONIG00000000022	ENSONIG00000000022	-	GL831446.1:59672-62819	q1	q2	NOTEST	0	0	0	0	1	1	no
ENSONIG00000000023	ENSONIG00000000023	-	GL831446.1:83087-85992	q1	q2	NOTEST	0	0	0	0	1	1	no
ENSONIG00000000024	ENSONIG00000000024	-	GL831446.1:109632-111113	q1	q2	NOTEST	0	0	0	0	1	1	no
ENSONIG00000000025	ENSONIG00000000025	-	GL831446.1:138979-142025	q1	q2	NOTEST	0	0	0	0	1	1	no
ENSONIG00000000026	ENSONIG00000000026	-	GL831446.1:161770-163603	q1	q2	NOTEST	0	0	0	0	1	1	no
ENSONIG00000000027	ENSONIG00000000027	-	GL831446.1:212895-215002	q1	q2	NOTEST	1.47587	1.0898	-0.437507	0	1	1	no
ENSONIG00000000028	ENSONIG00000000028	-	GL831446.1:298858-299503	q1	q2	NOTEST	0	0.446194	inf	0	1	1	no
ENSONIG00000000029	ENSONIG00000000029	CCT4	GL831280.1:32957-53546	q1	q2	OK	78.1906	89.4994	0.194882	2.34888	5e-05	0.000373456	yes
ENSONIG00000000030	ENSONIG00000000030	-	GL831446.1:325577-327690	q1	q2	NOTEST	0	0	0	0	1	1	no
ENSONIG00000000031	ENSONIG00000000031	SPIC	GL831243.1:2392098-2394442	q1	q2	NOTEST	0	0	0	0	1	1	no
ENSONIG00000000032	ENSONIG00000000032	-	GL831446.1:330638-333181	q1	q2	NOTEST	0	0	0	0	1	1	no
ENSONIG00000000033	ENSONIG00000000033	TMEM185B	GL831446.1:367523-374863	q1	q2	OK	8.01549	8.99404	0.166179	0.631657	0.27955	0.425585	no
ENSONIG00000000034	ENSONIG00000000034	MYBPC1	GL831243.1:2400554-2438259	q1	q2	NOTEST	0	0	0	0	1	1	no
ENSONIG00000000035	ENSONIG00000000035	MUS81	GL831446.1:375493-384908	q1	q2	NOTEST	0.16039	0.165585	0.045983	0	1	1	no
ENSONIG00000000036	ENSONIG00000000036	PUS10	GL831280.1:32957-53546	q1	q2	OK	19.2359	25.6682	0.416181	1.46039	0.01415	0.0457764	yes
ENSONIG00000000037	ENSONIG00000000037	OVOL1	GL831446.1:388319-399226	q1	q2	NOTEST	0.984118	1.18507	0.268074	0	1	1	no
ENSONIG00000000038	ENSONIG00000000038	AKT3 (2 of 2)	GL831280.1:55935-74118	q1	q2	OK	6.52542	8.50172	0.381684	1.72484	0.0041	0.0168749	yes
ENSONIG00000000039	ENSONIG00000000039	CMAS	GL831446.1:470543-479862	q1	q2	NOTEST	0.27084	0.386714	0.51383	0	1	1	no
ENSONIG00000000040	ENSONIG00000000040	-	GL832066.1:22477-30190	q1	q2	NOTEST	0.239716	0	#NAME?	0	1	1	no
ENSONIG00000000041	ENSONIG00000000041	-	GL831280.1:132396-143223	q1	q2	NOTEST	0.228805	0.537295	1.2316	0	1	1	no
ENSONIG00000000042	ENSONIG00000000042	LTV1	GL831280.1:146160-154100	q1	q2	OK	19.2428	15.8066	-0.283795	-1.05073	0.06685	0.151067	no
ENSONIG00000000043	ENSONIG00000000043	CAPN9	GL831280.1:155167-167753	q1	q2	NOTEST	0	0	0	0	1	1	no
ENSONIG00000000044	ENSONIG00000000044	-	GL831268.1:35355-35838	q1	q2	NOTEST	0	0	0	0	1	1	no
ENSONIG00000000045	ENSONIG00000000045	-	GL831268.1:38291-41062	q1	q2	NOTEST	0	0	0	0	1	1	no
ENSONIG00000000046	ENSONIG00000000046	RSPO2	GL831268.1:45783-106479	q1	q2	NOTEST	0.444604	0.0641299	-2.79345	0	1	1	no
ENSONIG00000000047	ENSONIG00000000047	EIF3E	GL831268.1:112185-141135	q1	q2	OK	92.106	110.909	0.268015	3.05932	5e-05	0.000373456	yes
ENSONIG00000000048	ENSONIG00000000048	CHPT1	GL831243.1:2442640-2449076	q1	q2	OK	6.61677	5.01842	-0.398893	-0.795016	0.1714	0.299426	no
ENSONIG00000000049	ENSONIG00000000049	TTC35	GL831268.1:149525-176522	q1	q2	OK	5.22308	5.70479	0.127273	0.449233	0.4465	0.58654	no
ENSONIG00000000050	ENSONIG00000000050	GNPTAB	GL831243.1:2456692-2477366	q1	q2	NOTEST	2.50871	3.34979	0.417123	0	1	1	no
ENSONIG00000000051	ENSONIG00000000051	TRHR (1 of 2)	GL831268.1:244797-254554	q1	q2	NOTEST	2.75396	1.61883	-0.766554	0	1	1	no
ENSONIG00000000052	ENSONIG00000000052	GDF6 (1 of 2)	GL831268.1:399789-407641	q1	q2	NOTEST	0.0486476	0.0513288	0.0774006	0	1	1	no
ENSONIG00000000053	ENSONIG00000000053	DRAM1	GL831243.1:2485281-2489048	q1	q2	NOTEST	0.314897	0.477932	0.601924	0	1	1	no
ENSONIG00000000054	ENSONIG00000000054	CCDC53	GL831243.1:2493615-2497857	q1	q2	OK	5.22403	6.60171	0.337676	0.469213	0.4034	0.546999	no
ENSONIG00000000055	ENSONIG00000000055	SYBU	GL831268.1:416403-423827	q1	q2	NOTEST	2.95675	1.61907	-0.868844	0	1	1	no
ENSONIG00000000056	ENSONIG00000000056	EBAG9	GL831268.1:427650-432011	q1	q2	OK	9.48004	8.28573	-0.194264	-0.364465	0.515	0.650238	no
ENSONIG00000000057	ENSONIG00000000057	-	GL831243.1:2498613-2505339	q1	q2	NOTEST	0.620753	0.0692144	-3.16488	0	1	1	no
ENSONIG00000000058	ENSONIG00000000058	-	GL831243.1:2514969-2528569	q1	q2	NOTEST	0.832982	1.09446	0.393869	0	1	1	no
ENSONIG00000000059	ENSONIG00000000059	TTK	GL831268.1:432110-442611	q1	q2	NOTEST	0	0.0507559	inf	0	1	1	no
ENSONIG00000000060	ENSONIG00000000060	-	AERX01073626.1:342-3069	q1	q2	NOTEST	0.991898	0.0826057	-3.58588	0	1	1	no
ENSONIG00000000061	ENSONIG00000000061	TAF5L	GL831280.1:169735-177495	q1	q2	NOTEST	1.33638	1.02769	-0.378922	0	1	1	no
ENSONIG00000000062	ENSONIG00000000062	BCKDHB	GL831268.1:445918-501624	q1	q2	OK	4.73641	4.37959	-0.112998	-0.228586	0.7008	0.801333	no
ENSONIG00000000063	ENSONIG00000000063	NUP133	GL831280.1:178913-199138	q1	q2	NOTEST	3.6103	3.73758	0.049985	0	1	1	no
ENSONIG00000000064	ENSONIG00000000064	FAM46A (1 of 2)	GL831268.1:575250-580751	q1	q2	OK	7.27656	7.79663	0.0995942	0.425597	0.45655	0.595941	no
ENSONIG00000000065	ENSONIG00000000065	IBTK	GL831268.1:593273-612730	q1	q2	OK	8.65061	6.75062	-0.357781	-1.39681	0.01725	0.0532835	no
ENSONIG00000000066	ENSONIG00000000066	ACTC1 (4 of 5)	GL831280.1:203307-208798	q1	q2	NOTEST	2.70674	3.47567	0.360734	0	1	1	no
ENSONIG00000000067	ENSONIG00000000067	ARHGEF37	GL831451.1:162534-171664	q1	q2	NOTEST	2.65605	2.34262	-0.181162	0	1	1	no
ENSONIG00000000068	ENSONIG00000000068	CDC6	GL831280.1:221118-226353	q1	q2	NOTEST	0	0	0	0	1	1	no
ENSONIG00000000069	ENSONIG00000000069	-	GL831451.1:247029-260192	q1	q2	OK	4.34403	5.41324	0.317458	0.724626	0.1994	0.333873	no
ENSONIG00000000070	ENSONIG00000000070	POLR2B	GL831451.1:301623-332095	q1	q2	OK	21.5128	18.9144	-0.185712	-1.08983	0.0578	0.135383	no
ENSONIG00000000071	ENSONIG00000000071	UBE3D	GL831268.1:648878-667869	q1	q2	OK	8.17213	11.037	0.43357	1.16312	0.04675	0.115118	no
ENSONIG00000000072	ENSONIG00000000072	DOPEY1	GL831268.1:668711-696938	q1	q2	NOTEST	2.97645	3.46232	0.218143	0	1	1	no
ENSONIG00000000073	ENSONIG00000000073	WIPF2	GL831280.1:259913-272279	q1	q2	OK	11.2544	11.6038	0.0441106	0.116785	0.84785	0.90258	no
ENSONIG00000000074	ENSONIG00000000074	IGFBP7	GL831451.1:332709-342224	q1	q2	OK	4.98038	3.62498	-0.45828	-0.43698	0.5205	0.654554	no
ENSONIG00000000075	ENSONIG00000000075	CRY1 (1 of 2)	GL831243.1:32385-48822	q1	q2	OK	18.2707	14.7399	-0.309802	-1.15381	0.04755	0.116768	no
ENSONIG00000000076	ENSONIG00000000076	SYT10	GL831243.1:83684-102371	q1	q2	NOTEST	0	0	0	0	1	1	no
ENSONIG00000000077	ENSONIG00000000077	MYF5	GL831243.1:705568-708716	q1	q2	NOTEST	0.074772	0	#NAME?	0	1	1	no
ENSONIG00000000078	ENSONIG00000000078	LIN7A	GL831243.1:723219-743713	q1	q2	OK	38.5529	44.6754	0.212639	0.674553	0.2446	0.387771	no
ENSONIG00000000079	ENSONIG00000000079	ACSS3	GL831243.1:768726-815383	q1	q2	NOTEST	0.955634	1.0862	0.184759	0	1	1	no
ENSONIG00000000080	ENSONIG00000000080	PPFIA2	GL831243.1:821453-995200	q1	q2	NOTEST	0	0	0	0	1	1	no
ENSONIG00000000081	ENSONIG00000000081	-	GL831243.1:1037163-1043954	q1	q2	NOTEST	0.0555231	0	#NAME?	0	1	1	no
ENSONIG00000000082	ENSONIG00000000082	FOXM1 (1 of 2)	GL831243.1:1052408-1055819	q1	q2	NOTEST	0	0	0	0	1	1	no
ENSONIG00000000083	ENSONIG00000000083	C12ORF32	GL831243.1:1056829-1057879	q1	q2	NOTEST	0.249528	0	#NAME?	0	1	1	no
ENSONIG00000000084	ENSONIG00000000084	TULP3	GL831243.1:1072276-1083811	q1	q2	OK	16.3361	19.4714	0.253294	0.876796	0.12265	0.235095	no
ENSONIG00000000085	ENSONIG00000000085	TRIM35 (18 of 54)	GL831243.1:1090460-1092526	q1	q2	NOTEST	3.6182	1.44454	-1.32466	0	1	1	no
ENSONIG00000000086	ENSONIG00000000086	PTN	GL831243.1:1160308-1173842	q1	q2	NOTEST	0.914802	0	#NAME?	0	1	1	no
ENSONIG00000000087	ENSONIG00000000087	MTPN	GL831243.1:1402531-1420291	q1	q2	OK	6.37084	4.98524	-0.35382	-1.37668	0.0176	0.0541254	no
ENSONIG00000000088	ENSONIG00000000088	FAM180A (1 of 2)	GL831243.1:1462658-1472815	q1	q2	NOTEST	0	0	0	0	1	1	no
ENSONIG00000000089	ENSONIG00000000089	SEMA3C	GL831243.1:1520465-1542878	q1	q2	OK	7.1472	4.04359	-0.821741	-1.84871	0.0017	0.00818629	yes
ENSONIG00000000090	ENSONIG00000000090	CD36	GL831243.1:1545555-1553043	q1	q2	NOTEST	0.0722032	0	#NAME?	0	1	1	no
ENSONIG00000000091	ENSONIG00000000091	-	GL831243.1:1556451-1571989	q1	q2	OK	39.6388	44.5769	0.169383	1.27618	0.02835	0.0786819	no
ENSONIG00000000092	ENSONIG00000000092	MAGI2 (1 of 2)	GL831243.1:1742563-1928974	q1	q2	NOTEST	0.644288	0.850829	0.401163	0	1	1	no
ENSONIG00000000093	ENSONIG00000000093	-	AERX01071771.2:9-5216	q1	q2	NOTEST	0.557012	0.157675	-1.82076	0	1	1	no
ENSONIG00000000094	ENSONIG00000000094	FAR2	GL831243.1:1941682-1996321	q1	q2	OK	8.11705	12.2719	0.596334	1.76909	0.00275	0.0121112	yes
ENSONIG00000000095	ENSONIG00000000095	ERGIC2 (2 of 2)	GL831243.1:2000340-2004992	q1	q2	NOTEST	3.179	3.04218	-0.0634696	0	1	1	no
ENSONIG00000000096	ENSONIG00000000096	JHDM1D	GL831243.1:2008397-2036880	q1	q2	OK	6.02353	7.88989	0.389397	1.10792	0.05575	0.131809	no
ENSONIG00000000097	ENSONIG00000000097	MLL5	GL831243.1:2058195-2077950	q1	q2	OK	12.3676	13.3649	0.111891	0.64432	0.24765	0.390441	no
ENSONIG00000000098	ENSONIG00000000098	LHFPL3 (1 of 2)	GL831243.1:2083059-2137469	q1	q2	NOTEST	3.82537	1.89376	-1.01434	0	1	1	no
ENSONIG00000000099	ENSONIG00000000099	ORC5	GL831243.1:2139223-2150050	q1	q2	NOTEST	0	0	0	0	1	1	no
ENSONIG00000000100	ENSONIG00000000100	COX18	GL831451.1:346052-354691	q1	q2	OK	5.08405	6.45581	0.344618	0.47971	0.39805	0.5422	no
ENSONIG00000000101	ENSONIG00000000101	-	GL831451.1:363501-372993	q1	q2	OK	25.0025	27.4081	0.132529	0.329919	0.55885	0.686715	no
ENSONIG00000000102	ENSONIG00000000102	NPEPPS	GL831280.1:289647-316879	q1	q2	OK	10.5064	10.1441	-0.0506367	-0.194008	0.74085	0.82805	no
ENSONIG00000000103	ENSONIG00000000103	SQSTM1	GL831451.1:382844-386180	q1	q2	OK	261.078	464.664	0.83171	11.0366	5e-05	0.000373456	yes
ENSONIG00000000104	ENSONIG00000000104	SNAP91 (1 of 2)	GL831268.1:698098-750932	q1	q2	NOTEST	2.57768	1.86963	-0.46332	0	1	1	no
ENSONIG00000000105	ENSONIG00000000105	TBC1D9B	GL831451.1:413435-427508	q1	q2	OK	9.60142	7.09943	-0.435545	-1.8429	0.00145	0.00712983	yes
ENSONIG00000000106	ENSONIG00000000106	ME1	GL831268.1:807469-859564	q1	q2	OK	9.42045	8.76701	-0.103712	-0.276462	0.62965	0.747286	no
ENSONIG00000000107	ENSONIG00000000107	MRPL45	GL831280.1:319166-328819	q1	q2	OK	6.17008	6.29343	0.0285574	0.057133	0.909	0.944597	no
ENSONIG00000000108	ENSONIG00000000108	RNF130	GL831451.1:436493-477283	q1	q2	NOTEST	2.98766	2.09609	-0.511313	0	1	1	no
ENSONIG00000000109	ENSONIG00000000109	GPR179	GL831280.1:330444-358774	q1	q2	NOTEST	0	0	0	0	1	1	no
ENSONIG00000000110	ENSONIG00000000110	F2RL3	GL831451.1:482114-483383	q1	q2	NOTEST	2.88158	1.48315	-0.958194	0	1	1	no
ENSONIG00000000111	ENSONIG00000000111	ARAP3	GL831451.1:495489-565510	q1	q2	NOTEST	2.28616	2.22175	-0.0412332	0	1	1	no
ENSONIG00000000112	ENSONIG00000000112	PRDM13	GL831268.1:904332-911334	q1	q2	NOTEST	0.0531203	0	#NAME?	0	1	1	no
ENSONIG00000000113	ENSONIG00000000113	-	GL831268.1:917115-921443	q1	q2	NOTEST	0	0	0	0	1	1	no
ENSONIG00000000114	ENSONIG00000000114	SOCS7 (2 of 2)	GL831280.1:368604-387983	q1	q2	NOTEST	1.20289	1.22843	0.0303049	0	1	1	no
ENSONIG00000000115	ENSONIG00000000115	-	GL831268.1:923448-926259	q1	q2	NOTEST	0.599733	0.878626	0.550929	0	1	1	no
ENSONIG00000000116	ENSONIG00000000116	USP45	GL831268.1:928166-959767	q1	q2	NOTEST	4.43309	4.3579	-0.024681	0	1	1	no
ENSONIG00000000117	ENSONIG00000000117	SP2	GL831280.1:393487-404835	q1	q2	NOTEST	1.10856	0.313268	-1.82321	0	1	1	no
ENSONIG00000000118	ENSONIG00000000118	-	GL831451.1:570604-585300	q1	q2	NOTEST	2.39136	4.47332	0.903517	0	1	1	no
ENSONIG00000000119	ENSONIG00000000119	ABCC10	GL831280.1:409939-425315	q1	q2	NOTEST	0.910147	0.608589	-0.580631	0	1	1	no
ENSONIG00000000120	ENSONIG00000000120	PNISR	GL831268.1:966473-972901	q1	q2	OK	51.5639	52.5107	0.0262498	0.210948	0.7208	0.815161	no
ENSONIG00000000121	ENSONIG00000000121	FAM98A (2 of 3)	GL832371.1:5558-9104	q1	q2	NOTEST	4.15397	3.35849	-0.306679	0	1	1	no
ENSONIG00000000122	ENSONIG00000000122	-	GL832133.1:1754-4246	q1	q2	NOTEST	0.408481	0.612933	0.585461	0	1	1	no
ENSONIG00000000123	ENSONIG00000000123	-	AERX01075601.2:193-1542	q1	q2	NOTEST	0	0	0	0	1	1	no
ENSONIG00000000124	ENSONIG00000000124	COQ3	GL831268.1:976834-981939	q1	q2	NOTEST	4.19611	3.38519	-0.309815	0	1	1	no
ENSONIG00000000125	ENSONIG00000000125	FAXC (2 of 2)	GL831268.1:983938-999191	q1	q2	OK	2.84939	5.39816	0.921813	1.05601	0.0316	0.0854028	no
ENSONIG00000000126	ENSONIG00000000126	-	GL831893.1:29899-31971	q1	q2	NOTEST	0.399267	0.0964381	-2.04968	0	1	1	no
ENSONIG00000000127	ENSONIG00000000127	FBXL4	GL831268.1:1028854-1046043	q1	q2	NOTEST	1.14262	1.31854	0.206593	0	1	1	no
ENSONIG00000000128	ENSONIG00000000128	MMS22L	GL831268.1:1268760-1317735	q1	q2	NOTEST	0.11985	0.22695	0.921141	0	1	1	no
ENSONIG00000000129	ENSONIG00000000129	PTPRM (2 of 3)	GL831812.1:3035-99163	q1	q2	OK	7.94455	9.19122	0.21029	0.817391	0.1563	0.280049	no
ENSONIG00000000130	ENSONIG00000000130	KLHL32	GL831268.1:1268760-1317735	q1	q2	NOTEST	1.0755	0.283541	-1.92338	0	1	1	no
ENSONIG00000000131	ENSONIG00000000131	-	GL831395.1:7370-11141	q1	q2	OK	2.20808	10.9923	2.31562	1.92535	0.1346	0.251934	no
ENSONIG00000000132	ENSONIG00000000132	-	AERX01073306.1:5-1375	q1	q2	NOTEST	2.2138	2.4505	0.146549	0	1	1	no
ENSONIG00000000133	ENSONIG00000000133	-	GL831395.1:16878-20276	q1	q2	OK	8.36753	17.434	1.05903	3.7199	5e-05	0.000373456	yes
ENSONIG00000000134	ENSONIG00000000134	GTF3C1 (1 of 2)	GL831395.1:22726-46499	q1	q2	OK	5.61833	5.99045	0.0925209	0.401145	0.47275	0.611	no
ENSONIG00000000135	ENSONIG00000000135	FZD6	GL831268.1:1319884-1328498	q1	q2	OK	7.79965	8.53951	0.130743	0.368449	0.522	0.655654	no
ENSONIG00000000136	ENSONIG00000000136	MRPL4	GL831280.1:446158-457569	q1	q2	NOTEST	2.18518	2.4779	0.181366	0	1	1	no
ENSONIG00000000137	ENSONIG00000000137	CTHRC1	GL831268.1:1331276-1336874	q1	q2	OK	6.60232	7.03802	0.0921962	0.114081	0.8405	0.898612	no
ENSONIG00000000138	ENSONIG00000000138	HYLS1	GL831280.1:446158-457569	q1	q2	NOTEST	3.81137	4.20948	0.143334	0	1	1	no
ENSONIG00000000139	ENSONIG00000000139	SLC25A32	GL831268.1:1337682-1342009	q1	q2	OK	4.91308	2.42585	-1.01814	-1.01425	0.06755	0.151994	no
ENSONIG00000000140	ENSONIG00000000140	SEMA6D	GL831420.1:27930-48568	q1	q2	NOTEST	1.46481	1.05224	-0.477244	0	1	1	no
ENSONIG00000000141	ENSONIG00000000141	COL9A1 (2 of 2)	GL831280.1:459035-480806	q1	q2	NOTEST	0	0.0397968	inf	0	1	1	no
ENSONIG00000000142	ENSONIG00000000142	DCAF13	GL831268.1:1342955-1356285	q1	q2	OK	12.5483	8.73338	-0.522879	-1.2883	0.0279	0.0777762	no
ENSONIG00000000143	ENSONIG00000000143	RIMS2	GL831268.1:1357827-1498039	q1	q2	OK	14.0808	25.5767	0.861098	6.82397	5e-05	0.000373456	yes
ENSONIG00000000144	ENSONIG00000000144	AXIN1 (2 of 2)	GL831395.1:48877-67257	q1	q2	NOTEST	2.40543	1.3357	-0.848692	0	1	1	no
ENSONIG00000000145	ENSONIG00000000145	DMXL2	GL831420.1:298756-343668	q1	q2	NOTEST	2.95009	2.63528	-0.162803	0	1	1	no
ENSONIG00000000146	ENSONIG00000000146	THUMPD1	GL831395.1:85686-87351	q1	q2	NOTEST	3.17341	1.18196	-1.42486	0	1	1	no
ENSONIG00000000147	ENSONIG00000000147	ERI2	GL831395.1:90234-94319	q1	q2	NOTEST	0	0	0	0	1	1	no
ENSONIG00000000148	ENSONIG00000000148	-	GL831395.1:94749-106347	q1	q2	NOTEST	1.62374	0.511085	-1.66768	0	1	1	no
ENSONIG00000000149	ENSONIG00000000149	TM7SF4	GL831268.1:1507181-1529880	q1	q2	NOTEST	0	0	0	0	1	1	no
ENSONIG00000000150	ENSONIG00000000150	DPYS	GL831268.1:1533752-1548638	q1	q2	NOTEST	0.0398221	0	#NAME?	0	1	1	no
ENSONIG00000000151	ENSONIG00000000151	PARN	GL831395.1:108188-120927	q1	q2	OK	5.53885	2.98864	-0.890097	-1.97213	0.00095	0.00500381	yes
ENSONIG00000000152	ENSONIG00000000152	ZFPM2	GL831268.1:1642028-1731860	q1	q2	NOTEST	0.0417249	0.0455842	0.127628	0	1	1	no
ENSONIG00000000153	ENSONIG00000000153	GLDN	GL831420.1:298756-343668	q1	q2	NOTEST	0.294087	0	#NAME?	0	1	1	no
ENSONIG00000000154	ENSONIG00000000154	OXR1	GL831268.1:1883541-1930334	q1	q2	NOTEST	2.74076	4.16778	0.604701	0	1	1	no
ENSONIG00000000155	ENSONIG00000000155	CYP19A1 (1 of 2)	GL831420.1:347058-350035	q1	q2	NOTEST	0.115357	0.120931	0.0680858	0	1	1	no
ENSONIG00000000156	ENSONIG00000000156	PTP4A1	GL831280.1:485663-489158	q1	q2	OK	41.3895	57.5846	0.476421	1.62295	0.0058	0.0221605	yes
ENSONIG00000000157	ENSONIG00000000157	LGSN	GL831280.1:497799-500830	q1	q2	NOTEST	0	0	0	0	1	1	no
ENSONIG00000000158	ENSONIG00000000158	FAM83B (2 of 2)	GL831280.1:512259-515165	q1	q2	NOTEST	0	0	0	0	1	1	no
ENSONIG00000000159	ENSONIG00000000159	MYOM2 (1 of 2)	GL831280.1:515766-542576	q1	q2	NOTEST	0.0363097	0.0345301	-0.0725006	0	1	1	no
ENSONIG00000000160	ENSONIG00000000160	ELFN1 (2 of 2)	GL831395.1:295063-303036	q1	q2	NOTEST	0.0589726	0	#NAME?	0	1	1	no
ENSONIG00000000161	ENSONIG00000000161	SQLE	GL831268.1:1933831-1939803	q1	q2	NOTEST	1.58283	1.69372	0.0976868	0	1	1	no
ENSONIG00000000162	ENSONIG00000000162	MAD1L1	GL831395.1:329383-396127	q1	q2	NOTEST	2.6841	1.71809	-0.643633	0	1	1	no
ENSONIG00000000163	ENSONIG00000000163	RNF144B	GL831268.1:1955177-1965660	q1	q2	NOTEST	0.855106	1.04505	0.2894	0	1	1	no
ENSONIG00000000164	ENSONIG00000000164	IQCG	GL831268.1:1969591-1974483	q1	q2	NOTEST	2.41069	1.4287	-0.754749	0	1	1	no
ENSONIG00000000165	ENSONIG00000000165	SPIRE1 (1 of 2)	GL831268.1:1975083-2011860	q1	q2	NOTEST	0.612371	0.937612	0.614586	0	1	1	no
ENSONIG00000000166	ENSONIG00000000166	TNFAIP8L3	GL831420.1:361648-385292	q1	q2	OK	14.4672	12.991	-0.155279	-0.927203	0.1062	0.212569	no
ENSONIG00000000167	ENSONIG00000000167	SCG3	GL831420.1:392046-406346	q1	q2	OK	3055.79	4054.82	0.408095	18.0001	5e-05	0.000373456	yes
ENSONIG00000000168	ENSONIG00000000168	-	GL831395.1:456367-460468	q1	q2	NOTEST	0.345833	0.827188	1.25814	0	1	1	no
ENSONIG00000000169	ENSONIG00000000169	-	GL831395.1:505598-516034	q1	q2	NOTEST	2.82138	3.54543	0.329562	0	1	1	no
ENSONIG00000000170	ENSONIG00000000170	-	GL831268.1:2025245-2036781	q1	q2	NOTEST	0	0	0	0	1	1	no
ENSONIG00000000171	ENSONIG00000000171	TTYH3 (2 of 2)	GL831395.1:520802-547863	q1	q2	NOTEST	2.38224	1.6414	-0.537393	0	1	1	no
ENSONIG00000000172	ENSONIG00000000172	LYSMD2	GL831420.1:407507-413785	q1	q2	OK	6.17524	6.32585	0.0347631	0.0380447	0.9469	0.967197	no
ENSONIG00000000173	ENSONIG00000000173	-	GL832573.1:2346-4666	q1	q2	NOTEST	0	0	0	0	1	1	no
ENSONIG00000000174	ENSONIG00000000174	TMOD2	GL831420.1:425524-440432	q1	q2	OK	18.5607	17.9604	-0.0474339	-0.282949	0.62025	0.738919	no
ENSONIG00000000175	ENSONIG00000000175	IQCE	GL831395.1:548657-558372	q1	q2	OK	6.52911	7.09869	0.120667	0.389638	0.47945	0.617375	no
ENSONIG00000000176	ENSONIG00000000176	LEO1	GL831420.1:443293-453552	q1	q2	OK	13.9263	9.86068	-0.498057	-1.66063	0.0036	0.015134	yes
ENSONIG00000000177	ENSONIG00000000177	FSCN1 (2 of 2)	GL831395.1:562565-569221	q1	q2	NOTEST	1.01452	0.480543	-1.07806	0	1	1	no
ENSONIG00000000178	ENSONIG00000000178	-	GL831395.1:574282-575465	q1	q2	NOTEST	2.173	0.300715	-2.85321	0	1	1	no
ENSONIG00000000179	ENSONIG00000000179	PLK1	GL831395.1:578467-584167	q1	q2	NOTEST	0.504223	0.496524	-0.022199	0	1	1	no
ENSONIG00000000180	ENSONIG00000000180	MAPK6	GL831420.1:478368-489289	q1	q2	OK	39.1119	70.7254	0.854621	9.0564	5e-05	0.000373456	yes
ENSONIG00000000181	ENSONIG00000000181	PALB2	GL831395.1:587107-595693	q1	q2	NOTEST	0	0	0	0	1	1	no
ENSONIG00000000182	ENSONIG00000000182	TBX5	GL831315.1:35001-53946	q1	q2	NOTEST	0	0	0	0	1	1	no
ENSONIG00000000183	ENSONIG00000000183	USP50	GL831420.1:500390-518812	q1	q2	NOTEST	0.246391	0.665165	1.43276	0	1	1	no
ENSONIG00000000184	ENSONIG00000000184	RDH8 (2 of 2)	GL831395.1:598985-604303	q1	q2	NOTEST	0	0	0	0	1	1	no
ENSONIG00000000185	ENSONIG00000000185	USP8	GL831420.1:500390-518812	q1	q2	OK	7.79182	9.16899	0.234802	1.14691	0.04585	0.113345	no
ENSONIG00000000186	ENSONIG00000000186	HK1 (2 of 2)	GL831280.1:548236-566757	q1	q2	OK	5.7677	5.53774	-0.058698	-0.224746	0.6959	0.797615	no
ENSONIG00000000187	ENSONIG00000000187	TBX3	GL831315.1:76329-86049	q1	q2	NOTEST	1.69476	0.774066	-1.13055	0	1	1	no
ENSONIG00000000188	ENSONIG00000000188	COL5A3 (2 of 2)	GL831395.1:607539-650390	q1	q2	NOTEST	0	0	0	0	1	1	no
ENSONIG00000000189	ENSONIG00000000189	MED13L	GL831315.1:255666-340772	q1	q2	NOTEST	0.466316	0.526046	0.173882	0	1	1	no
ENSONIG00000000190	ENSONIG00000000190	HDC	GL831420.1:523807-526945	q1	q2	NOTEST	0.110502	0	#NAME?	0	1	1	no
ENSONIG00000000191	ENSONIG00000000191	ZBTB45	GL831280.1:568155-574854	q1	q2	NOTEST	0.313535	0	#NAME?	0	1	1	no
ENSONIG00000000192	ENSONIG00000000192	-	GL831420.1:572422-584647	q1	q2	NOTEST	0	0	0	0	1	1	no
ENSONIG00000000193	ENSONIG00000000193	MTFP1	GL831315.1:357102-364791	q1	q2	NOTEST	3.53565	3.25694	-0.118461	0	1	1	no
ENSONIG00000000194	ENSONIG00000000194	DLL1 (1 of 2)	GL831280.1:586864-592597	q1	q2	NOTEST	0.166222	0.0506856	-1.71346	0	1	1	no
ENSONIG00000000195	ENSONIG00000000195	-	GL831315.1:380998-382463	q1	q2	NOTEST	0	0	0	0	1	1	no
ENSONIG00000000196	ENSONIG00000000196	LMAN2L (1 of 2)	GL831315.1:387521-396926	q1	q2	NOTEST	1.58725	1.60921	0.0198213	0	1	1	no
ENSONIG00000000197	ENSONIG00000000197	RHOU (2 of 2)	GL831280.1:606636-610877	q1	q2	NOTEST	0	0.109578	inf	0	1	1	no
ENSONIG00000000198	ENSONIG00000000198	GATM	GL831420.1:588589-593265	q1	q2	NOTEST	0	0.0567682	inf	0	1	1	no
ENSONIG00000000199	ENSONIG00000000199	-	GL831280.1:632607-643887	q1	q2	NOTEST	0	0	0	0	1	1	no
ENSONIG00000000200	ENSONIG00000000200	PDE8A	GL831420.1:630107-654258	q1	q2	OK	4.52908	4.99449	0.141119	0.438144	0.44705	0.586951	no
ENSONIG00000000201	ENSONIG00000000201	-	GL831315.1:404764-409026	q1	q2	NOTEST	2.86924	2.19042	-0.389459	0	1	1	no
ENSONIG00000000202	ENSONIG00000000202	SLIT1 (2 of 2)	GL831280.1:646257-717628	q1	q2	NOTEST	0	0.0374814	inf	0	1	1	no
ENSONIG00000000203	ENSONIG00000000203	-	GL831315.1:410576-414087	q1	q2	NOTEST	1.36383	0.50416	-1.43571	0	1	1	no
ENSONIG00000000204	ENSONIG00000000204	OLFM2 (2 of 2)	GL831395.1:658906-693770	q1	q2	NOTEST	0	0.14199	inf	0	1	1	no
ENSONIG00000000205	ENSONIG00000000205	PAX8	GL831315.1:437123-446164	q1	q2	NOTEST	0	0	0	0	1	1	no
ENSONIG00000000206	ENSONIG00000000206	-	GL831420.1:657141-670725	q1	q2	OK	6.39381	8.42087	0.397293	0.662562	0.25555	0.3972	no
ENSONIG00000000207	ENSONIG00000000207	FSD2	GL831420.1:657141-670725	q1	q2	NOTEST	2.81402	2.78472	-0.0151006	0	1	1	no
ENSONIG00000000208	ENSONIG00000000208	PSD4	GL831315.1:455502-460319	q1	q2	NOTEST	0	0.202462	inf	0	1	1	no
ENSONIG00000000209	ENSONIG00000000209	WHAMM	GL831420.1:671441-685437	q1	q2	OK	5.40498	6.20065	0.198129	0.494698	0.3916	0.535735	no
ENSONIG00000000210	ENSONIG00000000210	MFAP4 (9 of 9)	GL831395.1:718389-720421	q1	q2	NOTEST	0	0	0	0	1	1	no
ENSONIG00000000211	ENSONIG00000000211	-	GL831315.1:469461-472547	q1	q2	NOTEST	1.03507	0.341258	-1.60079	0	1	1	no
ENSONIG00000000212	ENSONIG00000000212	SAPCD2	GL831315.1:481006-492444	q1	q2	NOTEST	0.456494	0.494775	0.116178	0	1	1	no
ENSONIG00000000213	ENSONIG00000000213	TRIP10 (2 of 2)	GL831395.1:722906-741198	q1	q2	NOTEST	2.06361	2.39976	0.217719	0	1	1	no
ENSONIG00000000214	ENSONIG00000000214	HOMER2	GL831420.1:691652-721522	q1	q2	NOTEST	1.76807	0.953777	-0.890451	0	1	1	no
ENSONIG00000000215	ENSONIG00000000215	-	GL831731.1:8303-31112	q1	q2	NOTEST	0.537342	0.2181	-1.30085	0	1	1	no
ENSONIG00000000216	ENSONIG00000000216	-	GL831731.1:60356-62188	q1	q2	NOTEST	2.67795	1.38187	-0.954504	0	1	1	no
ENSONIG00000000217	ENSONIG00000000217	TMEM141	GL831315.1:493859-500730	q1	q2	NOTEST	1.41855	0.807743	-0.812445	0	1	1	no
ENSONIG00000000218	ENSONIG00000000218	-	GL831731.1:82228-84387	q1	q2	NOTEST	1.19505	1.53333	0.359606	0	1	1	no
ENSONIG00000000219	ENSONIG00000000219	ZMYND19	GL831315.1:510374-515932	q1	q2	OK	8.70406	8.75746	0.00882471	0.0333088	0.93965	0.963811	no
ENSONIG00000000220	ENSONIG00000000220	SH2D3A	GL831395.1:743596-756660	q1	q2	NOTEST	0.753414	0.337301	-1.15941	0	1	1	no
ENSONIG00000000221	ENSONIG00000000221	BTBD1	GL831420.1:734422-740741	q1	q2	NOTEST	3.18069	2.82538	-0.170893	0	1	1	no
ENSONIG00000000222	ENSONIG00000000222	BSPRY	GL831315.1:524132-531961	q1	q2	NOTEST	1.60498	0.767369	-1.06457	0	1	1	no
ENSONIG00000000223	ENSONIG00000000223	SLC7A11	GL831793.1:51988-98131	q1	q2	NOTEST	0.422871	0.830254	0.973335	0	1	1	no
ENSONIG00000000224	ENSONIG00000000224	GPR116 (1 of 5)	GL831315.1:575432-580661	q1	q2	NOTEST	0	0	0	0	1	1	no
ENSONIG00000000225	ENSONIG00000000225	TM6SF1	GL831420.1:741651-749073	q1	q2	NOTEST	0.410669	0.344416	-0.253825	0	1	1	no
ENSONIG00000000226	ENSONIG00000000226	VAV1	GL831395.1:758104-787745	q1	q2	NOTEST	0.536888	0.446822	-0.264921	0	1	1	no
ENSONIG00000000227	ENSONIG00000000227	-	GL831315.1:998696-1011840	q1	q2	OK	31.0845	23.8728	-0.380824	-1.41374	0.0167	0.0522259	no
ENSONIG00000000228	ENSONIG00000000228	ZRSR2	GL831420.1:750520-762560	q1	q2	NOTEST	4.00055	1.92291	-1.0569	0	1	1	no
ENSONIG00000000229	ENSONIG00000000229	AP1S2 (1 of 2)	GL831420.1:750520-762560	q1	q2	OK	5.63308	2.96516	-0.925817	-2.33105	0.0003	0.00186802	yes
ENSONIG00000000230	ENSONIG00000000230	-	GL831909.1:20483-21513	q1	q2	NOTEST	0	0	0	0	1	1	no
ENSONIG00000000231	ENSONIG00000000231	ASB2 (1 of 2)	GL831315.1:1021287-1034342	q1	q2	NOTEST	0.180814	0.168445	-0.102228	0	1	1	no
ENSONIG00000000232	ENSONIG00000000232	-	GL831909.1:34047-44174	q1	q2	NOTEST	0.631695	1.32256	1.06603	0	1	1	no
ENSONIG00000000233	ENSONIG00000000233	-	GL831603.1:71786-77279	q1	q2	NOTEST	0.212649	0.156299	-0.444167	0	1	1	no
ENSONIG00000000234	ENSONIG00000000234	-	GL831603.1:102667-127192	q1	q2	NOTEST	2.1754	1.56682	-0.473443	0	1	1	no
ENSONIG00000000235	ENSONIG00000000235	SIGLEC1	GL832016.1:35744-41571	q1	q2	NOTEST	0	0	0	0	1	1	no
ENSONIG00000000236	ENSONIG00000000236	ASB2 (2 of 2)	GL831315.1:1037393-1046570	q1	q2	NOTEST	0.553739	0	#NAME?	0	1	1	no
ENSONIG00000000237	ENSONIG00000000237	PPP4R4	GL831315.1:1061188-1074167	q1	q2	OK	14.8341	17.2026	0.213717	0.882494	0.12435	0.237413	no
ENSONIG00000000238	ENSONIG00000000238	-	AERX01074624.1:499-1315	q1	q2	NOTEST	0	0	0	0	1	1	no
ENSONIG00000000239	ENSONIG00000000239	-	AERX01072586.2:167-3504	q1	q2	NOTEST	0.509436	0.427277	-0.253731	0	1	1	no
ENSONIG00000000240	ENSONIG00000000240	-	GL831603.1:142258-151840	q1	q2	NOTEST	0.0571889	0.0625841	0.130061	0	1	1	no
ENSONIG00000000241	ENSONIG00000000241	-	GL831603.1:163542-175218	q1	q2	NOTEST	1.45969	1.24035	-0.234913	0	1	1	no
ENSONIG00000000242	ENSONIG00000000242	SERPINA10 (2 of 2)	GL831315.1:1081506-1084109	q1	q2	OK	43.8686	33.7646	-0.377679	-1.63632	0.0052	0.0203883	yes
ENSONIG00000000243	ENSONIG00000000243	-	GL831603.1:230225-252425	q1	q2	NOTEST	0.503145	0.312347	-0.687826	0	1	1	no
ENSONIG00000000244	ENSONIG00000000244	-	GL831987.1:1387-4039	q1	q2	NOTEST	0	0	0	0	1	1	no
ENSONIG00000000245	ENSONIG00000000245	XRCC3	GL831315.1:1096512-1104939	q1	q2	NOTEST	1.82958	1.38614	-0.40044	0	1	1	no
ENSONIG00000000246	ENSONIG00000000246	BRF1 (1 of 3)	GL831315.1:1107095-1118062	q1	q2	OK	5.11627	4.4709	-0.194529	-0.297728	0.60605	0.726465	no
ENSONIG00000000247	ENSONIG00000000247	-	AERX01075951.1:20-1437	q1	q2	NOTEST	3.16595	3.19286	0.0122133	0	1	1	no
ENSONIG00000000248	ENSONIG00000000248	SNRPB	GL831390.1:658-5852	q1	q2	OK	37.0855	29.2347	-0.34317	-1.56716	0.00675	0.0251039	yes
ENSONIG00000000249	ENSONIG00000000249	-	GL831528.1:113543-119103	q1	q2	NOTEST	0	0.127029	inf	0	1	1	no
ENSONIG00000000250	ENSONIG00000000250	-	GL831390.1:7916-10169	q1	q2	NOTEST	0.621007	0.512927	-0.275856	0	1	1	no
ENSONIG00000000251	ENSONIG00000000251	UBL5	GL831395.1:788544-790443	q1	q2	OK	43.3094	53.8101	0.313194	0.885786	0.1238	0.236866	no
ENSONIG00000000252	ENSONIG00000000252	-	GL831390.1:11121-14667	q1	q2	NOTEST	0	0	0	0	1	1	no
ENSONIG00000000253	ENSONIG00000000253	PIN1	GL831395.1:791056-798038	q1	q2	OK	18.9196	20.4533	0.112453	0.40808	0.479	0.616922	no
ENSONIG00000000254	ENSONIG00000000254	UBE2C	GL831390.1:24298-27447	q1	q2	NOTEST	0.218848	0	#NAME?	0	1	1	no
ENSONIG00000000255	ENSONIG00000000255	LCOR	GL831280.1:747224-825923	q1	q2	NOTEST	0	0	0	0	1	1	no
ENSONIG00000000256	ENSONIG00000000256	BTBD6 (2 of 2)	GL831315.1:1107095-1118062	q1	q2	OK	15.7276	13.1661	-0.256463	-0.634171	0.2638	0.407126	no
ENSONIG00000000257	ENSONIG00000000257	MORN4 (2 of 2)	GL831280.1:828199-848231	q1	q2	NOTEST	0	0	0	0	1	1	no
ENSONIG00000000258	ENSONIG00000000258	PRF1 (14 of 15)	GL831395.1:803128-831284	q1	q2	NOTEST	0	0.218722	inf	0	1	1	no
ENSONIG00000000259	ENSONIG00000000259	POLR2J2	GL831390.1:32662-34335	q1	q2	OK	27.4675	23.0139	-0.255218	-0.381904	0.5056	0.641004	no
ENSONIG00000000260	ENSONIG00000000260	SLC5A6 (1 of 2)	GL831315.1:1138106-1161806	q1	q2	NOTEST	3.07462	3.29303	0.0990097	0	1	1	no
ENSONIG00000000261	ENSONIG00000000261	PCIF1	GL831390.1:64382-72854	q1	q2	OK	5.50522	5.57174	0.0173278	0.0654422	0.8915	0.932886	no
ENSONIG00000000262	ENSONIG00000000262	HOGA1	GL831280.1:867765-895059	q1	q2	NOTEST	0	0.0836639	inf	0	1	1	no
ENSONIG00000000263	ENSONIG00000000263	-	GL831390.1:81853-105679	q1	q2	NOTEST	0.748313	0.297688	-1.32984	0	1	1	no
ENSONIG00000000264	ENSONIG00000000264	CNNM1 (1 of 2)	GL831280.1:900061-918867	q1	q2	NOTEST	0	0	0	0	1	1	no
ENSONIG00000000265	ENSONIG00000000265	PRF1 (10 of 15)	GL831395.1:867017-885058	q1	q2	NOTEST	0	0	0	0	1	1	no
ENSONIG00000000266	ENSONIG00000000266	RPL7L1	GL831315.1:1167815-1172598	q1	q2	OK	25.8151	19.6979	-0.39017	-1.74976	0.0028	0.0122712	yes
ENSONIG00000000267	ENSONIG00000000267	ISY1	GL831390.1:116553-120949	q1	q2	OK	13.1274	13.3877	0.0283255	0.0863998	0.87465	0.9218	no
ENSONIG00000000268	ENSONIG00000000268	GOT1 (1 of 2)	GL831280.1:923464-929736	q1	q2	OK	5.00096	5.54489	0.148954	0.259087	0.6524	0.76539	no
ENSONIG00000000269	ENSONIG00000000269	ZCCHC13	GL831390.1:123690-155593	q1	q2	NOTEST	2.87036	1.77603	-0.692571	0	1	1	no
ENSONIG00000000270	ENSONIG00000000270	-	GL831315.1:1195692-1198148	q1	q2	NOTEST	0	0	0	0	1	1	no
ENSONIG00000000271	ENSONIG00000000271	-	GL831315.1:1244150-1248134	q1	q2	NOTEST	0	0	0	0	1	1	no
ENSONIG00000000272	ENSONIG00000000272	-	GL831390.1:123690-155593	q1	q2	NOTEST	0.50603	0.157591	-1.68304	0	1	1	no
ENSONIG00000000273	ENSONIG00000000273	CNIH3	GL831315.1:1359858-1528339	q1	q2	NOTEST	0.165777	0.0774934	-1.0971	0	1	1	no
ENSONIG00000000274	ENSONIG00000000274	-	GL831390.1:123690-155593	q1	q2	OK	6.55475	5.11304	-0.358361	-0.631361	0.2839	0.42971	no
ENSONIG00000000275	ENSONIG00000000275	-	GL831475.1:61742-69053	q1	q2	NOTEST	0.814743	0.303561	-1.42436	0	1	1	no
ENSONIG00000000276	ENSONIG00000000276	URGCP (9 of 15)	GL831866.1:44349-48883	q1	q2	NOTEST	0	0	0	0	1	1	no
ENSONIG00000000277	ENSONIG00000000277	SMG7	GL831475.1:89581-106663	q1	q2	OK	5.94069	6.66566	0.166116	0.581004	0.31105	0.457235	no
ENSONIG00000000278	ENSONIG00000000278	TSEN2	GL831390.1:161521-170072	q1	q2	OK	4.53927	4.71615	0.0551475	0.0886375	0.86185	0.913102	no
ENSONIG00000000279	ENSONIG00000000279	NKX2-3 (2 of 2)	GL831280.1:956500-961280	q1	q2	NOTEST	0.0412813	0	#NAME?	0	1	1	no
ENSONIG00000000280	ENSONIG00000000280	MKRN2-AS1	GL831390.1:174488-176931	q1	q2	OK	5.52665	0.628826	-3.13567	-1.55367	0.24675	0.389706	no
ENSONIG00000000281	ENSONIG00000000281	MKRN2	GL831390.1:184890-190202	q1	q2	OK	16.3702	17.2831	0.0782898	0.234563	0.6837	0.788374	no
ENSONIG00000000282	ENSONIG00000000282	-	GL831475.1:116567-147194	q1	q2	NOTEST	0.757523	0.511108	-0.567662	0	1	1	no
ENSONIG00000000283	ENSONIG00000000283	NMNAT2	GL831475.1:151943-163892	q1	q2	OK	37.6804	42.4837	0.173096	0.660994	0.24425	0.387687	no
ENSONIG00000000284	ENSONIG00000000284	TOX4 (1 of 2)	GL831457.1:52906-65377	q1	q2	OK	3.58572	5.24186	0.547816	1.12275	0.0585	0.136667	no
ENSONIG00000000285	ENSONIG00000000285	SLC25A28 (2 of 2)	GL831280.1:980547-986627	q1	q2	OK	20.1507	23.5888	0.22727	0.750699	0.1803	0.311513	no
ENSONIG00000000286	ENSONIG00000000286	ENTPD7	GL831280.1:988629-998277	q1	q2	NOTEST	2.76778	2.92421	0.0793207	0	1	1	no
ENSONIG00000000287	ENSONIG00000000287	SLC12A6	GL831457.1:72202-93491	q1	q2	NOTEST	1.31888	1.35857	0.0427775	0	1	1	no
ENSONIG00000000288	ENSONIG00000000288	LAMC2	GL831475.1:166547-175141	q1	q2	NOTEST	0.468449	0.438274	-0.0960598	0	1	1	no
ENSONIG00000000289	ENSONIG00000000289	FAM107A	GL831390.1:206741-209059	q1	q2	NOTEST	1.58826	3.97485	1.32345	0	1	1	no
ENSONIG00000000290	ENSONIG00000000290	PIK3C2B	GL831390.1:228277-259867	q1	q2	OK	11.495	13.0663	0.184845	0.993917	0.08255	0.177733	no
ENSONIG00000000291	ENSONIG00000000291	NOP10	GL831457.1:99173-104012	q1	q2	OK	26.5244	31.472	0.246747	1.09823	0.05915	0.137878	no
ENSONIG00000000292	ENSONIG00000000292	LPCAT4	GL831457.1:136387-148103	q1	q2	NOTEST	1.17617	0.725916	-0.696224	0	1	1	no
ENSONIG00000000293	ENSONIG00000000293	DHX9	GL831475.1:184170-197293	q1	q2	NOTEST	2.29534	1.89246	-0.278443	0	1	1	no
ENSONIG00000000294	ENSONIG00000000294	-	GL831280.1:1012433-1042201	q1	q2	NOTEST	0.89503	1.32197	0.562684	0	1	1	no
ENSONIG00000000295	ENSONIG00000000295	ATP6V0E2	GL831280.1:1053473-1059029	q1	q2	NOTEST	3.88895	6.36014	0.709679	0	1	1	no
ENSONIG00000000296	ENSONIG00000000296	TMEM85	GL831457.1:149484-156979	q1	q2	OK	17.922	16.0628	-0.158007	-0.752791	0.18475	0.316333	no
ENSONIG00000000297	ENSONIG00000000297	-	GL831280.1:1075128-1087191	q1	q2	NOTEST	2.00486	2.48131	0.307598	0	1	1	no
ENSONIG00000000298	ENSONIG00000000298	ALDH4A1	GL831390.1:315790-330537	q1	q2	OK	19.9897	16.856	-0.245993	-1.11181	0.05675	0.133521	no
ENSONIG00000000299	ENSONIG00000000299	-	GL831280.1:1094899-1147520	q1	q2	NOTEST	0	0	0	0	1	1	no
ENSONIG00000000300	ENSONIG00000000300	-	GL831457.1:158371-171664	q1	q2	OK	8.70469	16.8549	0.953302	3.96994	5e-05	0.000373456	yes
ENSONIG00000000301	ENSONIG00000000301	-	GL831280.1:1350922-1359558	q1	q2	NOTEST	0	0	0	0	1	1	no
ENSONIG00000000302	ENSONIG00000000302	-	GL831280.1:1376818-1390531	q1	q2	NOTEST	0	0	0	0	1	1	no
ENSONIG00000000303	ENSONIG00000000303	-	GL831280.1:1422510-1426137	q1	q2	NOTEST	0	0	0	0	1	1	no
ENSONIG00000000304	ENSONIG00000000304	RNF123	GL831390.1:332344-445502	q1	q2	OK	9.60095	9.79205	0.028434	0.111739	0.84835	0.902601	no
ENSONIG00000000305	ENSONIG00000000305	LAMC1	GL831475.1:201564-266998	q1	q2	OK	5.86315	4.10926	-0.512796	-1.69871	0.0032	0.0137371	yes
ENSONIG00000000306	ENSONIG00000000306	-	GL831280.1:1586609-1616849	q1	q2	NOTEST	0	0	0	0	1	1	no
ENSONIG00000000307	ENSONIG00000000307	-	GL831457.1:171789-197467	q1	q2	OK	4.99765	6.4913	0.377257	1.43405	0.01055	0.0360201	yes
ENSONIG00000000308	ENSONIG00000000308	GRM7 (1 of 2)	GL831390.1:499441-664709	q1	q2	NOTEST	0.0557508	0.0288095	-0.95245	0	1	1	no
ENSONIG00000000309	ENSONIG00000000309	NYNRIN	GL831457.1:207559-221582	q1	q2	NOTEST	2.08668	3.34229	0.679629	0	1	1	no
ENSONIG00000000310	ENSONIG00000000310	RASAL2	GL831475.1:325583-359738	q1	q2	OK	42.1125	62.7922	0.576336	5.88314	5e-05	0.000373456	yes
ENSONIG00000000311	ENSONIG00000000311	RIPK3 (1 of 2)	GL831457.1:225222-241959	q1	q2	NOTEST	2.31848	3.1196	0.42818	0	1	1	no
ENSONIG00000000312	ENSONIG00000000312	-	GL831457.1:243433-250764	q1	q2	NOTEST	0	0	0	0	1	1	no
ENSONIG00000000313	ENSONIG00000000313	-	GL831457.1:251051-259106	q1	q2	NOTEST	0	0	0	0	1	1	no
ENSONIG00000000314	ENSONIG00000000314	-	GL832059.1:2019-4642	q1	q2	NOTEST	0.0706105	0	#NAME?	0	1	1	no
ENSONIG00000000315	ENSONIG00000000315	DLG1	GL831475.1:368648-466918	q1	q2	OK	8.6165	7.95159	-0.115859	-0.376224	0.5201	0.654182	no
ENSONIG00000000316	ENSONIG00000000316	-	AERX01074510.1:9-1221	q1	q2	NOTEST	0	0	0	0	1	1	no
ENSONIG00000000317	ENSONIG00000000317	-	GL831457.1:265150-271862	q1	q2	NOTEST	0.111167	0	#NAME?	0	1	1	no
ENSONIG00000000318	ENSONIG00000000318	-	GL831457.1:372548-379667	q1	q2	NOTEST	0	0.163037	inf	0	1	1	no
ENSONIG00000000319	ENSONIG00000000319	-	GL831475.1:504444-509979	q1	q2	NOTEST	0	0	0	0	1	1	no
ENSONIG00000000320	ENSONIG00000000320	-	GL831457.1:419721-435155	q1	q2	NOTEST	0	0	0	0	1	1	no
ENSONIG00000000321	ENSONIG00000000321	-	GL831460.1:217822-221966	q1	q2	NOTEST	0	0	0	0	1	1	no
ENSONIG00000000322	ENSONIG00000000322	-	GL831135.1:33501-36500	q1	q2	NOTEST	0	0	0	0	1	1	no
ENSONIG00000000323	ENSONIG00000000323	-	GL831457.1:451251-466668	q1	q2	OK	3.1718	5.32531	0.747562	0.938663	0.0911	0.191103	no
ENSONIG00000000324	ENSONIG00000000324	-	GL831457.1:489417-547849	q1	q2	NOTEST	0	0	0	0	1	1	no
ENSONIG00000000325	ENSONIG00000000325	-	GL831460.1:344685-364041	q1	q2	OK	5.87701	3.52866	-0.73596	-0.99889	0.1375	0.255537	no
ENSONIG00000000326	ENSONIG00000000326	-	GL831460.1:391466-393512	q1	q2	NOTEST	0.256616	0	#NAME?	0	1	1	no
ENSONIG00000000327	ENSONIG00000000327	-	GL831135.1:45556-52367	q1	q2	NOTEST	0	0	0	0	1	1	no
ENSONIG00000000328	ENSONIG00000000328	-	GL831135.1:98333-99821	q1	q2	NOTEST	0	0	0	0	1	1	no
ENSONIG00000000329	ENSONIG00000000329	-	GL831460.1:407980-427372	q1	q2	NOTEST	0.310502	0.324043	0.0615833	0	1	1	no
ENSONIG00000000330	ENSONIG00000000330	-	GL831135.1:113442-114796	q1	q2	NOTEST	0	0	0	0	1	1	no
ENSONIG00000000331	ENSONIG00000000331	-	GL831135.1:222688-225300	q1	q2	NOTEST	0	0	0	0	1	1	no
ENSONIG00000000332	ENSONIG00000000332	-	GL831460.1:543308-544633	q1	q2	OK	3.72965	5.9747	0.679826	0.841409	0.13605	0.253968	no
ENSONIG00000000333	ENSONIG00000000333	-	GL831135.1:245795-248274	q1	q2	NOTEST	0	0	0	0	1	1	no
ENSONIG00000000334	ENSONIG00000000334	POLH	GL831135.1:258822-263943	q1	q2	NOTEST	3.54717	2.44969	-0.534068	0	1	1	no
ENSONIG00000000335	ENSONIG00000000335	-	GL832410.1:3512-5376	q1	q2	NOTEST	0	0	0	0	1	1	no
ENSONIG00000000336	ENSONIG00000000336	-	GL831684.1:2172-12364	q1	q2	NOTEST	2.47282	2.06358	-0.261007	0	1	1	no
ENSONIG00000000337	ENSONIG00000000337	-	GL831135.1:266871-275147	q1	q2	OK	6.61773	3.08927	-1.09907	-2.02036	0.00265	0.011778	yes
ENSONIG00000000338	ENSONIG00000000338	-	GL831684.1:100778-121578	q1	q2	NOTEST	0.572138	0.629827	0.138591	0	1	1	no
ENSONIG00000000339	ENSONIG00000000339	-	GL831453.1:6404-8594	q1	q2	NOTEST	0	0	0	0	1	1	no
ENSONIG00000000340	ENSONIG00000000340	-	GL831453.1:13452-16450	q1	q2	NOTEST	0.236028	0.139157	-0.762241	0	1	1	no
ENSONIG00000000341	ENSONIG00000000341	-	GL831684.1:142805-147738	q1	q2	OK	14.2502	15.6692	0.136951	0.698021	0.22435	0.364301	no
ENSONIG00000000342	ENSONIG00000000342	-	GL831453.1:63992-66003	q1	q2	NOTEST	0.151172	0	#NAME?	0	1	1	no
ENSONIG00000000343	ENSONIG00000000343	-	GL831453.1:137840-139107	q1	q2	OK	19.8846	20.3593	0.0340329	0.0952894	0.86135	0.912726	no
ENSONIG00000000344	ENSONIG00000000344	CCDC130	GL831280.1:1617777-1624225	q1	q2	NOTEST	4.02369	3.28716	-0.291678	0	1	1	no
ENSONIG00000000345	ENSONIG00000000345	NIPAL4	GL831453.1:140485-151243	q1	q2	OK	13.0125	13.6855	0.0727465	0.196532	0.72885	0.820021	no
ENSONIG00000000346	ENSONIG00000000346	OTOR	GL831135.1:278135-278995	q1	q2	NOTEST	1.41396	2.01112	0.508255	0	1	1	no
ENSONIG00000000347	ENSONIG00000000347	PCSK2	GL831135.1:295004-336452	q1	q2	OK	30.1633	14.669	-1.04003	-7.99662	5e-05	0.000373456	yes
ENSONIG00000000348	ENSONIG00000000348	-	GL831453.1:174294-275456	q1	q2	NOTEST	0	0.0550175	inf	0	1	1	no
ENSONIG00000000349	ENSONIG00000000349	WDR83	GL831280.1:1636229-1640218	q1	q2	NOTEST	2.89821	1.31983	-1.13481	0	1	1	no
ENSONIG00000000350	ENSONIG00000000350	WDR83OS	GL831280.1:1640710-1644913	q1	q2	OK	21.6535	22.9014	0.0808373	0.293465	0.60215	0.722977	no
ENSONIG00000000351	ENSONIG00000000351	CACNA1A (2 of 2)	GL831280.1:1702038-1850137	q1	q2	NOTEST	4.06364	3.74648	-0.117236	0	1	1	no
ENSONIG00000000352	ENSONIG00000000352	BFSP1	GL831135.1:295004-336452	q1	q2	NOTEST	0	0	0	0	1	1	no
ENSONIG00000000353	ENSONIG00000000353	-	GL831135.1:346689-354213	q1	q2	NOTEST	0	0	0	0	1	1	no
ENSONIG00000000354	ENSONIG00000000354	PLEK	GL831135.1:369712-376921	q1	q2	NOTEST	0.57974	0.945178	0.70518	0	1	1	no
ENSONIG00000000355	ENSONIG00000000355	PCDH15 (1 of 2)	GL831135.1:443870-611356	q1	q2	NOTEST	0.566348	0.969461	0.775494	0	1	1	no
ENSONIG00000000356	ENSONIG00000000356	-	GL831453.1:435471-436001	q1	q2	NOTEST	0	0	0	0	1	1	no
ENSONIG00000000357	ENSONIG00000000357	NCF1	GL831453.1:503429-512059	q1	q2	OK	29.2133	31.8578	0.125022	0.504029	0.37285	0.518658	no
ENSONIG00000000358	ENSONIG00000000358	ST6GAL1	GL831453.1:525597-534670	q1	q2	NOTEST	1.90038	0.591104	-1.6848	0	1	1	no
ENSONIG00000000359	ENSONIG00000000359	-	GL831191.1:8203-14607	q1	q2	NOTEST	0.0658124	0.0689735	0.0676823	0	1	1	no
ENSONIG00000000360	ENSONIG00000000360	TOMM34 (2 of 2)	GL831191.1:15550-29413	q1	q2	NOTEST	1.18659	3.05698	1.36529	0	1	1	no
ENSONIG00000000361	ENSONIG00000000361	-	GL831453.1:541105-555853	q1	q2	NOTEST	0	0	0	0	1	1	no
ENSONIG00000000362	ENSONIG00000000362	-	AERX01074731.1:2-2196	q1	q2	NOTEST	0.188592	0.202224	0.100686	0	1	1	no
ENSONIG00000000363	ENSONIG00000000363	YWHAB (1 of 2)	GL831191.1:40176-62676	q1	q2	OK	127.169	140.879	0.147702	1.92379	0.0009	0.00478858	yes
ENSONIG00000000364	ENSONIG00000000364	SOX18	GL831618.1:19925-22794	q1	q2	NOTEST	0.423612	0.266188	-0.670299	0	1	1	no
ENSONIG00000000365	ENSONIG00000000365	TCEA2	GL831618.1:119054-125496	q1	q2	NOTEST	3.41361	2.28089	-0.581703	0	1	1	no
ENSONIG00000000366	ENSONIG00000000366	RIMS4	GL831191.1:117456-159865	q1	q2	NOTEST	0	0	0	0	1	1	no
ENSONIG00000000367	ENSONIG00000000367	-	GL831191.1:176640-189134	q1	q2	NOTEST	0	0	0	0	1	1	no
ENSONIG00000000368	ENSONIG00000000368	DKK1	GL831135.1:647623-649810	q1	q2	NOTEST	1.38072	0.463595	-1.57448	0	1	1	no
ENSONIG00000000369	ENSONIG00000000369	OLA.8570	GL831135.1:651233-744419	q1	q2	NOTEST	2.27829	2.04289	-0.15734	0	1	1	no
ENSONIG00000000370	ENSONIG00000000370	LSM3 (1 of 2)	GL831191.1:215804-219655	q1	q2	NOTEST	0	1.06606	inf	0	1	1	no
ENSONIG00000000371	ENSONIG00000000371	SLC6A6 (2 of 2)	GL831191.1:302225-316822	q1	q2	NOTEST	0.748612	1.10842	0.566216	0	1	1	no
ENSONIG00000000372	ENSONIG00000000372	RGS19	GL831618.1:131136-135829	q1	q2	NOTEST	1.585	1.71693	0.115347	0	1	1	no
ENSONIG00000000373	ENSONIG00000000373	-	GL831191.1:334224-422740	q1	q2	NOTEST	0	0	0	0	1	1	no
ENSONIG00000000374	ENSONIG00000000374	-	GL832198.1:62-11569	q1	q2	NOTEST	0	0	0	0	1	1	no
ENSONIG00000000375	ENSONIG00000000375	TRBC2	GL831153.1:780-10150	q1	q2	NOTEST	0	0.424883	inf	0	1	1	no
ENSONIG00000000376	ENSONIG00000000376	PAPLN (1 of 2)	GL831153.1:11271-34913	q1	q2	NOTEST	0.232668	0.542931	1.2225	0	1	1	no
ENSONIG00000000377	ENSONIG00000000377	SGMS1	GL831135.1:761745-770066	q1	q2	OK	5.91974	5.81748	-0.0251395	-0.084412	0.8859	0.928885	no
ENSONIG00000000378	ENSONIG00000000378	PSEN1	GL831153.1:44881-57033	q1	q2	NOTEST	3.82207	2.98037	-0.358864	0	1	1	no
ENSONIG00000000379	ENSONIG00000000379	MINPP1 (1 of 2)	GL831135.1:791709-805916	q1	q2	OK	4.93912	2.42549	-1.02598	-1.25787	0.0272	0.0762983	no
ENSONIG00000000380	ENSONIG00000000380	-	GL831191.1:581929-605109	q1	q2	OK	12.3383	16.0261	0.377282	1.9023	0.0012	0.00606169	yes
ENSONIG00000000381	ENSONIG00000000381	PAPSS2	GL831135.1:808480-821529	q1	q2	NOTEST	3.02036	1.70258	-0.827001	0	1	1	no
ENSONIG00000000382	ENSONIG00000000382	ERH	GL831153.1:57926-65086	q1	q2	NOTEST	1.48176	1.04802	-0.499643	0	1	1	no
ENSONIG00000000383	ENSONIG00000000383	-	GL831153.1:70247-79015	q1	q2	NOTEST	0.0906304	0.0864855	-0.0675361	0	1	1	no
ENSONIG00000000384	ENSONIG00000000384	PTPRT	GL831191.1:768521-1063571	q1	q2	NOTEST	0.533215	0.351105	-0.602813	0	1	1	no
ENSONIG00000000385	ENSONIG00000000385	EXD2	GL831153.1:83815-89048	q1	q2	NOTEST	3.37496	1.898	-0.83039	0	1	1	no
ENSONIG00000000386	ENSONIG00000000386	-	GL831135.1:824216-836068	q1	q2	OK	21.8946	23.7153	0.115242	0.433121	0.45305	0.592849	no
ENSONIG00000000387	ENSONIG00000000387	NUMBL	GL831153.1:92415-108994	q1	q2	OK	5.13606	3.69553	-0.47488	-0.932793	0.108	0.214873	no
ENSONIG00000000388	ENSONIG00000000388	FAS	GL831135.1:876247-880706	q1	q2	OK	6.10146	6.41252	0.0717378	0.110472	0.84235	0.899107	no
ENSONIG00000000389	ENSONIG00000000389	GALNTL1	GL831153.1:135779-174043	q1	q2	NOTEST	1.68279	1.68289	8.67e-05	0	1	1	no
ENSONIG00000000390	ENSONIG00000000390	-	GL831135.1:892636-894280	q1	q2	OK	10.7041	7.29516	-0.553156	-0.649101	0.2521	0.394	no
ENSONIG00000000391	ENSONIG00000000391	-	GL831135.1:905296-908637	q1	q2	OK	4.72764	5.72037	0.274988	0.503667	0.3987	0.542615	no
ENSONIG00000000392	ENSONIG00000000392	RSPO4	GL831191.1:1123772-1160304	q1	q2	NOTEST	0	0	0	0	1	1	no
ENSONIG00000000393	ENSONIG00000000393	CHD6	GL831191.1:1169369-1213872	q1	q2	NOTEST	0.443983	0.689125	0.634261	0	1	1	no
ENSONIG00000000394	ENSONIG00000000394	STX10	GL831280.1:1878991-1889268	q1	q2	OK	8.21763	8.36597	0.0258114	0.045048	0.9538	0.969152	no
ENSONIG00000000395	ENSONIG00000000395	WDR96	GL831135.1:908971-925969	q1	q2	NOTEST	0.116974	0.039115	-1.58039	0	1	1	no
ENSONIG00000000396	ENSONIG00000000396	SFR1	GL831135.1:926138-927027	q1	q2	NOTEST	1.00104	0.624812	-0.680011	0	1	1	no
ENSONIG00000000397	ENSONIG00000000397	-	GL831135.1:934337-954091	q1	q2	NOTEST	2.5532	2.81032	0.138425	0	1	1	no
ENSONIG00000000398	ENSONIG00000000398	VPS39	GL831153.1:185295-205533	q1	q2	NOTEST	0.94089	0.641506	-0.552563	0	1	1	no
ENSONIG00000000399	ENSONIG00000000399	NACC1 (1 of 2)	GL831280.1:1908205-1919878	q1	q2	NOTEST	0.0934091	0	#NAME?	0	1	1	no
ENSONIG00000000400	ENSONIG00000000400	TRMT1	GL831280.1:1935023-1963164	q1	q2	OK	7.813	8.13683	0.0585902	0.0954009	0.845	0.900766	no
ENSONIG00000000401	ENSONIG00000000401	FAM65C	GL831191.1:1303223-1326995	q1	q2	NOTEST	0.166595	0.157955	-0.07683	0	1	1	no
ENSONIG00000000402	ENSONIG00000000402	SLK (2 of 2)	GL831135.1:956656-975625	q1	q2	OK	6.15243	7.48197	0.28226	0.865316	0.1333	0.250246	no
ENSONIG00000000403	ENSONIG00000000403	GANC	GL831153.1:220068-243709	q1	q2	NOTEST	0.824925	0.459753	-0.843403	0	1	1	no
ENSONIG00000000404	ENSONIG00000000404	MCM2	GL831191.1:1383306-1390847	q1	q2	NOTEST	0.428227	0.457883	0.0966035	0	1	1	no
ENSONIG00000000405	ENSONIG00000000405	MAN2B1	GL831280.1:1935023-1963164	q1	q2	OK	6.05413	5.74997	-0.0743646	-0.166514	0.76445	0.846264	no
ENSONIG00000000406	ENSONIG00000000406	B3GNT3 (4 of 4)	GL831135.1:980355-982057	q1	q2	NOTEST	0.179986	0.186296	0.049712	0	1	1	no
ENSONIG00000000407	ENSONIG00000000407	SH3PXD2A (2 of 2)	GL831135.1:989730-1039078	q1	q2	NOTEST	1.56551	0.8072	-0.955631	0	1	1	no
ENSONIG00000000408	ENSONIG00000000408	LMCD1	GL831191.1:1400824-1405864	q1	q2	NOTEST	1.50759	1.5693	0.0578707	0	1	1	no
ENSONIG00000000409	ENSONIG00000000409	NEURL (2 of 2)	GL831135.1:1044139-1078483	q1	q2	NOTEST	0.0284649	0.128294	2.1722	0	1	1	no
ENSONIG00000000410	ENSONIG00000000410	SORCS3 (2 of 2)	GL831135.1:1142932-1188252	q1	q2	NOTEST	0	0	0	0	1	1	no
ENSONIG00000000411	ENSONIG00000000411	ABHD6 (2 of 2)	GL831191.1:1413061-1421827	q1	q2	NOTEST	0.624808	0.530173	-0.236949	0	1	1	no
ENSONIG00000000412	ENSONIG00000000412	-	GL832222.1:1527-6527	q1	q2	NOTEST	0	0	0	0	1	1	no
ENSONIG00000000413	ENSONIG00000000413	PXK	GL831191.1:1428116-1458223	q1	q2	OK	7.08263	7.1513	0.0139196	0.0646983	0.9147	0.948326	no
ENSONIG00000000414	ENSONIG00000000414	-	GL831375.1:62962-110240	q1	q2	NOTEST	1.47309	1.8366	0.318198	0	1	1	no
ENSONIG00000000415	ENSONIG00000000415	-	GL831375.1:140052-161776	q1	q2	NOTEST	0.120599	0	#NAME?	0	1	1	no
ENSONIG00000000416	ENSONIG00000000416	PDHB	GL831191.1:1458258-1465991	q1	q2	OK	28.1404	35.2518	0.325056	1.3532	0.0203	0.0609388	no
ENSONIG00000000417	ENSONIG00000000417	DAK	GL831375.1:187496-195802	q1	q2	NOTEST	0.531681	0.182911	-1.53942	0	1	1	no
ENSONIG00000000418	ENSONIG00000000418	-	GL831153.1:246244-261701	q1	q2	NOTEST	0.650176	0.451904	-0.524815	0	1	1	no
ENSONIG00000000419	ENSONIG00000000419	SORCS1 (2 of 2)	GL831135.1:1197460-1246353	q1	q2	NOTEST	0.342398	0.0271474	-3.65679	0	1	1	no
ENSONIG00000000420	ENSONIG00000000420	TMEM206	GL831153.1:261953-268538	q1	q2	NOTEST	1.51778	1.39206	-0.124738	0	1	1	no
ENSONIG00000000421	ENSONIG00000000421	ADD3 (2 of 2)	GL831135.1:1274339-1297577	q1	q2	OK	4.98064	3.72589	-0.418745	-0.896257	0.10175	0.206822	no
ENSONIG00000000422	ENSONIG00000000422	KCTD6 (2 of 2)	GL831191.1:1479494-1506376	q1	q2	NOTEST	2.28597	1.74409	-0.390328	0	1	1	no
ENSONIG00000000423	ENSONIG00000000423	NENF	GL831153.1:269229-271978	q1	q2	NOTEST	2.23772	1.94252	-0.204099	0	1	1	no
ENSONIG00000000424	ENSONIG00000000424	EXOC6B	GL831375.1:198615-327726	q1	q2	NOTEST	0.418426	0.566108	0.436105	0	1	1	no
ENSONIG00000000425	ENSONIG00000000425	CCDC71	GL831191.1:1554162-1555158	q1	q2	OK	4.87228	5.81919	0.256221	0.356451	0.52355	0.656871	no
ENSONIG00000000426	ENSONIG00000000426	STAB1	GL831191.1:1617242-1739000	q1	q2	NOTEST	0.0176039	0.0480568	1.44885	0	1	1	no
ENSONIG00000000427	ENSONIG00000000427	EZR (2 of 2)	GL831153.1:273012-284154	q1	q2	NOTEST	0.207611	0.0503832	-2.04287	0	1	1	no
ENSONIG00000000428	ENSONIG00000000428	-	GL831143.1:21378-94513	q1	q2	NOTEST	0.117145	0.142571	0.283381	0	1	1	no
ENSONIG00000000429	ENSONIG00000000429	KCNK3 (2 of 2)	GL831153.1:285622-287967	q1	q2	NOTEST	0	0	0	0	1	1	no
ENSONIG00000000430	ENSONIG00000000430	-	GL831153.1:293878-301345	q1	q2	NOTEST	0.523889	0	#NAME?	0	1	1	no
ENSONIG00000000431	ENSONIG00000000431	-	GL831143.1:99016-108254	q1	q2	NOTEST	0.0632318	0.0514684	-0.296963	0	1	1	no
ENSONIG00000000432	ENSONIG00000000432	MXI1 (2 of 2)	GL831135.1:1299412-1305177	q1	q2	NOTEST	0.79126	0	#NAME?	0	1	1	no
ENSONIG00000000433	ENSONIG00000000433	HHIPL2	GL831153.1:307558-315807	q1	q2	NOTEST	0.0475616	0	#NAME?	0	1	1	no
ENSONIG00000000434	ENSONIG00000000434	SMNDC1	GL831135.1:1307556-1312393	q1	q2	OK	41.1649	38.7899	-0.0857355	-0.360106	0.53295	0.664483	no
ENSONIG00000000435	ENSONIG00000000435	RPS12	GL831143.1:114007-115300	q1	q2	OK	1303.64	1750.97	0.425603	3.79214	5e-05	0.000373456	yes
ENSONIG00000000436	ENSONIG00000000436	EYA4	GL831143.1:118462-143248	q1	q2	NOTEST	2.62356	2.46493	-0.0899818	0	1	1	no
ENSONIG00000000437	ENSONIG00000000437	DCAF10	GL831153.1:324726-335784	q1	q2	NOTEST	0.546964	0.376806	-0.537622	0	1	1	no
ENSONIG00000000438	ENSONIG00000000438	BNIP3	GL831135.1:1325880-1335091	q1	q2	OK	26.4071	13.3307	-0.986173	-2.24797	0.0008	0.00433724	yes
ENSONIG00000000439	ENSONIG00000000439	FETUB (5 of 5)	AERX01074356.1:20-2703	q1	q2	NOTEST	0	0	0	0	1	1	no
ENSONIG00000000440	ENSONIG00000000440	-	GL831833.1:55962-58809	q1	q2	NOTEST	0	0	0	0	1	1	no
ENSONIG00000000441	ENSONIG00000000441	TRIM35 (53 of 54)	GL831143.1:176409-179293	q1	q2	NOTEST	0.149311	0.120531	-0.308917	0	1	1	no
ENSONIG00000000442	ENSONIG00000000442	CPXM1 (2 of 2)	GL831153.1:335906-350262	q1	q2	NOTEST	0.842756	0.951072	0.174439	0	1	1	no
ENSONIG00000000443	ENSONIG00000000443	PPP2R2D	GL831135.1:1325880-1335091	q1	q2	OK	15.0849	12.5025	-0.270879	-1.571	0.00625	0.0236074	yes
ENSONIG00000000444	ENSONIG00000000444	-	GL831565.1:41020-118987	q1	q2	OK	5.65487	4.05269	-0.480613	-1.24697	0.0354	0.093073	no
ENSONIG00000000445	ENSONIG00000000445	-	GL831565.1:168340-168914	q1	q2	NOTEST	0	0	0	0	1	1	no
ENSONIG00000000446	ENSONIG00000000446	TCF21	GL831143.1:198718-201056	q1	q2	NOTEST	0.197016	0.104873	-0.909672	0	1	1	no
ENSONIG00000000447	ENSONIG00000000447	TBPL1	GL831143.1:225768-229903	q1	q2	NOTEST	1.07912	0.213832	-2.3353	0	1	1	no
ENSONIG00000000448	ENSONIG00000000448	-	GL832171.1:2892-7845	q1	q2	NOTEST	2.91938	1.65169	-0.821719	0	1	1	no
ENSONIG00000000449	ENSONIG00000000449	-	GL831153.1:353585-367388	q1	q2	NOTEST	2.61742	2.08911	-0.325259	0	1	1	no
ENSONIG00000000450	ENSONIG00000000450	SLC2A12	GL831143.1:231916-241229	q1	q2	NOTEST	0.0805452	0.210197	1.38387	0	1	1	no
ENSONIG00000000451	ENSONIG00000000451	EBF3	GL831135.1:1347642-1416221	q1	q2	NOTEST	0.134386	0.164663	0.293129	0	1	1	no
ENSONIG00000000452	ENSONIG00000000452	SGK1	GL831143.1:249065-255623	q1	q2	OK	8.01443	8.03445	0.00359937	0.00909298	0.9854	0.986969	no
ENSONIG00000000453	ENSONIG00000000453	CYP26B1	GL831375.1:372466-409316	q1	q2	NOTEST	0.219754	0.441928	1.00792	0	1	1	no
ENSONIG00000000454	ENSONIG00000000454	UBE2D2	GL831153.1:371452-389783	q1	q2	OK	67.0597	68.2114	0.0245662	0.231917	0.68445	0.788804	no
ENSONIG00000000455	ENSONIG00000000455	TRIM35 (35 of 54)	GL831191.1:1617242-1739000	q1	q2	NOTEST	0.111029	0	#NAME?	0	1	1	no
ENSONIG00000000456	ENSONIG00000000456	MANBA	GL831153.1:371452-389783	q1	q2	NOTEST	0.361204	0.840226	1.21796	0	1	1	no
ENSONIG00000000457	ENSONIG00000000457	NISCH	GL831191.1:1754270-1778556	q1	q2	NOTEST	2.10511	2.03035	-0.0521703	0	1	1	no
ENSONIG00000000458	ENSONIG00000000458	GATA5	GL831399.1:142331-152133	q1	q2	NOTEST	0	0	0	0	1	1	no
ENSONIG00000000459	ENSONIG00000000459	ALDH8A1	GL831143.1:326173-330293	q1	q2	NOTEST	0.716708	0.337338	-1.08719	0	1	1	no
ENSONIG00000000460	ENSONIG00000000460	HBS1L	GL831143.1:333920-358512	q1	q2	OK	5.35606	4.36948	-0.293711	-0.634071	0.2759	0.421354	no
ENSONIG00000000461	ENSONIG00000000461	DYSF	GL831375.1:652809-739234	q1	q2	NOTEST	1.08738	1.54398	0.505808	0	1	1	no
ENSONIG00000000462	ENSONIG00000000462	FAM203B	GL831191.1:1801138-1809063	q1	q2	OK	5.02172	3.38997	-0.56691	-1.19399	0.04585	0.113345	no
ENSONIG00000000463	ENSONIG00000000463	-	GL831399.1:188710-189791	q1	q2	NOTEST	0.155515	0	#NAME?	0	1	1	no
ENSONIG00000000464	ENSONIG00000000464	HCK	GL831399.1:275290-284094	q1	q2	NOTEST	1.73456	1.51696	-0.193386	0	1	1	no
ENSONIG00000000465	ENSONIG00000000465	TM9SF4	GL831399.1:290589-310203	q1	q2	OK	11.4347	9.0171	-0.342685	-1.85931	0.00165	0.00798219	yes
ENSONIG00000000466	ENSONIG00000000466	C12ORF23	GL831191.1:1810457-1816565	q1	q2	OK	49.7898	45.2545	-0.137788	-0.308936	0.5784	0.704134	no
ENSONIG00000000467	ENSONIG00000000467	SOS2	GL831153.1:393535-431097	q1	q2	NOTEST	0.862775	1.3615	0.658141	0	1	1	no
ENSONIG00000000468	ENSONIG00000000468	RBBP5	GL831191.1:1818942-1835364	q1	q2	NOTEST	4.64715	2.94595	-0.657615	0	1	1	no
ENSONIG00000000469	ENSONIG00000000469	MYB	GL831143.1:367035-375914	q1	q2	NOTEST	0.0714625	0.518825	2.85999	0	1	1	no
ENSONIG00000000470	ENSONIG00000000470	MGMT	GL831135.1:1422622-1442425	q1	q2	NOTEST	2.55179	2.88432	0.176723	0	1	1	no
ENSONIG00000000471	ENSONIG00000000471	PTPRE (1 of 2)	GL831135.1:1506322-1530645	q1	q2	NOTEST	0.0737973	0.0346704	-1.08987	0	1	1	no
ENSONIG00000000472	ENSONIG00000000472	IPPK	GL831191.1:1837303-1861807	q1	q2	OK	5.18885	5.82354	0.166481	0.578829	0.28795	0.433828	no
ENSONIG00000000473	ENSONIG00000000473	PLAGL2	GL831399.1:324547-327421	q1	q2	NOTEST	0.0992136	0	#NAME?	0	1	1	no
ENSONIG00000000474	ENSONIG00000000474	POFUT1	GL831399.1:379115-383781	q1	q2	NOTEST	0.588136	0.434525	-0.43671	0	1	1	no
ENSONIG00000000475	ENSONIG00000000475	ECM2	GL831191.1:1865378-1888554	q1	q2	NOTEST	0	0	0	0	1	1	no
ENSONIG00000000476	ENSONIG00000000476	PDE7B	GL831143.1:417788-430900	q1	q2	NOTEST	0.220067	0.604793	1.4585	0	1	1	no
ENSONIG00000000477	ENSONIG00000000477	L2HGDH	GL831153.1:432995-437522	q1	q2	NOTEST	1.3235	0.434259	-1.60773	0	1	1	no
ENSONIG00000000478	ENSONIG00000000478	KLHL7 (2 of 2)	GL831399.1:388401-397544	q1	q2	NOTEST	0	0	0	0	1	1	no
ENSONIG00000000479	ENSONIG00000000479	ASPN	GL831191.1:1894719-1902565	q1	q2	NOTEST	0	0	0	0	1	1	no
ENSONIG00000000480	ENSONIG00000000480	ATP5S	GL831153.1:439029-444602	q1	q2	OK	4.68831	0.692021	-2.76018	-1.25961	0.25035	0.392494	no
ENSONIG00000000481	ENSONIG00000000481	CRAT (4 of 5)	GL831399.1:402091-416529	q1	q2	NOTEST	0	0	0	0	1	1	no
ENSONIG00000000482	ENSONIG00000000482	FAM54A	GL831143.1:447695-450186	q1	q2	NOTEST	0	0.212915	inf	0	1	1	no
ENSONIG00000000483	ENSONIG00000000483	CDKL1	GL831153.1:445443-451853	q1	q2	OK	11.9068	21.4758	0.850933	2.2167	0.00045	0.00267238	yes
ENSONIG00000000484	ENSONIG00000000484	-	GL831143.1:451727-457232	q1	q2	OK	4.91765	5.20253	0.0812461	0.239085	0.674	0.781775	no
ENSONIG00000000485	ENSONIG00000000485	FAM196A (2 of 2)	GL831135.1:1588838-1610478	q1	q2	NOTEST	0.0810724	0	#NAME?	0	1	1	no
ENSONIG00000000486	ENSONIG00000000486	MAP4K5	GL831153.1:455505-481963	q1	q2	NOTEST	4.22948	3.85867	-0.132375	0	1	1	no
ENSONIG00000000487	ENSONIG00000000487	IDO1	GL831135.1:1615948-1621756	q1	q2	NOTEST	0	0.211176	inf	0	1	1	no
ENSONIG00000000488	ENSONIG00000000488	OGN (1 of 2)	GL831191.1:1932413-1939519	q1	q2	NOTEST	0	0	0	0	1	1	no
ENSONIG00000000489	ENSONIG00000000489	MAP7 (1 of 2)	GL831143.1:457399-479825	q1	q2	OK	4.01218	5.10849	0.348513	0.843567	0.1349	0.252421	no
ENSONIG00000000490	ENSONIG00000000490	KIF3B	GL831399.1:423810-435754	q1	q2	NOTEST	1.69485	2.06284	0.283473	0	1	1	no
ENSONIG00000000491	ENSONIG00000000491	NOL8	GL831191.1:1954835-1967320	q1	q2	NOTEST	2.49722	2.21338	-0.174071	0	1	1	no
ENSONIG00000000492	ENSONIG00000000492	ADAM12 (1 of 2)	GL831135.1:1669847-1757553	q1	q2	NOTEST	1.19744	2.04974	0.77549	0	1	1	no
ENSONIG00000000493	ENSONIG00000000493	PCMTD2	GL831399.1:438751-441610	q1	q2	NOTEST	2.45205	1.01951	-1.2661	0	1	1	no
ENSONIG00000000494	ENSONIG00000000494	GPR37L1 (1 of 2)	GL831191.1:1969073-1974992	q1	q2	NOTEST	0.624382	0.841613	0.430728	0	1	1	no
ENSONIG00000000495	ENSONIG00000000495	PPP1R14C	GL831143.1:492322-515220	q1	q2	OK	2.39389	11.8924	2.31261	1.23675	0.0405	0.103412	no
ENSONIG00000000496	ENSONIG00000000496	ATP2B4	GL831191.1:2115785-2208741	q1	q2	OK	3.94529	4.85464	0.299232	0.860242	0.14115	0.260123	no
ENSONIG00000000497	ENSONIG00000000497	IYD	GL831143.1:521695-526772	q1	q2	NOTEST	0.0454661	0	#NAME?	0	1	1	no
ENSONIG00000000498	ENSONIG00000000498	ADHFE1	GL831375.1:762608-770589	q1	q2	NOTEST	1.32441	0.778759	-0.766097	0	1	1	no
ENSONIG00000000499	ENSONIG00000000499	MYT1 (1 of 2)	GL831399.1:453847-497271	q1	q2	NOTEST	3.10791	2.85849	-0.120693	0	1	1	no
ENSONIG00000000500	ENSONIG00000000500	SEC63	GL831143.1:526811-540036	q1	q2	OK	22.6696	17.9793	-0.334419	-1.68745	0.00325	0.0138948	yes
ENSONIG00000000501	ENSONIG00000000501	SCML4	GL831143.1:550757-561978	q1	q2	OK	8.96623	8.87022	-0.0155314	-0.0689979	0.90125	0.939493	no
ENSONIG00000000502	ENSONIG00000000502	NBAS	GL831143.1:724642-902736	q1	q2	NOTEST	1.12911	1.36942	0.278383	0	1	1	no
ENSONIG00000000503	ENSONIG00000000503	-	GL831375.1:775389-900628	q1	q2	NOTEST	0	0	0	0	1	1	no
ENSONIG00000000504	ENSONIG00000000504	-	GL831375.1:775389-900628	q1	q2	NOTEST	0.199403	0.616477	1.62836	0	1	1	no
ENSONIG00000000505	ENSONIG00000000505	TBC1D22B	GL831399.1:589705-608020	q1	q2	NOTEST	1.4516	2.42246	0.738832	0	1	1	no
ENSONIG00000000506	ENSONIG00000000506	DHX32 (1 of 2)	GL831135.1:1768726-1775793	q1	q2	NOTEST	0	0	0	0	1	1	no
ENSONIG00000000507	ENSONIG00000000507	C10ORF137	GL831135.1:1777226-1789730	q1	q2	OK	22.2643	33.1697	0.575137	4.08538	5e-05	0.000373456	yes
ENSONIG00000000508	ENSONIG00000000508	-	GL832443.1:3729-5305	q1	q2	NOTEST	0	0	0	0	1	1	no
ENSONIG00000000509	ENSONIG00000000509	ATL1	GL831153.1:483830-497459	q1	q2	OK	6.45408	4.45308	-0.535408	-1.16861	0.04335	0.108703	no
ENSONIG00000000510	ENSONIG00000000510	CTBP2	GL831135.1:1836681-1873236	q1	q2	OK	5.00299	4.98038	-0.00653633	-0.0176467	0.97125	0.978093	no
ENSONIG00000000511	ENSONIG00000000511	PROSC	GL831399.1:622470-626588	q1	q2	NOTEST	4.28922	2.76055	-0.635757	0	1	1	no
ENSONIG00000000512	ENSONIG00000000512	CEPT1	GL831191.1:2231058-2250966	q1	q2	NOTEST	2.88509	2.12726	-0.439618	0	1	1	no
ENSONIG00000000513	ENSONIG00000000513	DDX1	GL831143.1:902780-909261	q1	q2	NOTEST	2.85306	0.677643	-2.07391	0	1	1	no
ENSONIG00000000514	ENSONIG00000000514	SAV1	GL831153.1:500749-507561	q1	q2	NOTEST	2.68762	1.89722	-0.502441	0	1	1	no
ENSONIG00000000515	ENSONIG00000000515	ZRANB1	GL831135.1:1878581-1902549	q1	q2	OK	9.37727	13.586	0.534885	2.43192	5e-05	0.000373456	yes
ENSONIG00000000516	ENSONIG00000000516	NIN	GL831153.1:507600-539925	q1	q2	NOTEST	0.984902	1.20548	0.291559	0	1	1	no
ENSONIG00000000517	ENSONIG00000000517	DRAM2	GL831191.1:2253934-2259548	q1	q2	NOTEST	3.96536	1.35294	-1.55136	0	1	1	no
ENSONIG00000000518	ENSONIG00000000518	TMED4	GL831399.1:627634-642500	q1	q2	OK	30.5118	29.5879	-0.04436	-0.1197	0.8357	0.895047	no
ENSONIG00000000519	ENSONIG00000000519	FAM175B	GL831135.1:1906478-1914718	q1	q2	OK	3.65884	5.24412	0.519313	0.734749	0.19625	0.330796	no
ENSONIG00000000520	ENSONIG00000000520	IKBKG	GL831399.1:647500-661050	q1	q2	OK	13.0038	24.391	0.907413	3.6474	5e-05	0.000373456	yes
ENSONIG00000000521	ENSONIG00000000521	C6ORF89	GL831191.1:2260003-2269030	q1	q2	OK	9.74366	7.91762	-0.299396	-0.764704	0.1471	0.268071	no
ENSONIG00000000522	ENSONIG00000000522	METTL10	GL831135.1:1914826-1920705	q1	q2	OK	7.59321	6.70284	-0.179939	-0.239205	0.67385	0.781746	no
ENSONIG00000000523	ENSONIG00000000523	NFS1	GL831191.1:2269179-2278701	q1	q2	OK	94.7831	90.7924	-0.0620592	-0.768559	0.18345	0.314879	no
ENSONIG00000000524	ENSONIG00000000524	FAM53B (2 of 2)	GL831135.1:1935310-1947833	q1	q2	OK	16.6412	21.3399	0.358794	1.08919	0.0604	0.140272	no
ENSONIG00000000525	ENSONIG00000000525	SEPHS2	GL831399.1:662950-670437	q1	q2	OK	10.1162	7.51921	-0.428013	-1.71907	0.00375	0.0156287	yes
ENSONIG00000000526	ENSONIG00000000526	NKX1-2	GL831135.1:1984129-1986184	q1	q2	NOTEST	0	0	0	0	1	1	no
ENSONIG00000000527	ENSONIG00000000527	CHST15 (2 of 2)	GL831135.1:2010065-2016161	q1	q2	NOTEST	2.13332	1.27412	-0.743605	0	1	1	no
ENSONIG00000000528	ENSONIG00000000528	GPR26 (2 of 2)	GL831135.1:2035635-2040251	q1	q2	NOTEST	1.82381	2.5175	0.465033	0	1	1	no
ENSONIG00000000529	ENSONIG00000000529	AP4B1	GL831399.1:670569-698089	q1	q2	NOTEST	0.780325	1.16252	0.575111	0	1	1	no
ENSONIG00000000530	ENSONIG00000000530	HMX2	GL831135.1:2132365-2135038	q1	q2	NOTEST	0.167103	0.0793927	-1.07366	0	1	1	no
ENSONIG00000000531	ENSONIG00000000531	ABHD12B	GL831153.1:507600-539925	q1	q2	NOTEST	0.136144	0.727114	2.41705	0	1	1	no
ENSONIG00000000532	ENSONIG00000000532	HMX3 (1 of 2)	GL831135.1:2139775-2143360	q1	q2	NOTEST	1.63948	0.564751	-1.53756	0	1	1	no
ENSONIG00000000533	ENSONIG00000000533	IKZF5	GL831135.1:2163204-2173882	q1	q2	NOTEST	1.6235	0.180581	-3.1684	0	1	1	no
ENSONIG00000000534	ENSONIG00000000534	PYGL	GL831153.1:540508-552330	q1	q2	NOTEST	0.675337	0.120297	-2.48901	0	1	1	no
ENSONIG00000000535	ENSONIG00000000535	CUZD1	GL831135.1:2163204-2173882	q1	q2	NOTEST	1.23102	0.907577	-0.43976	0	1	1	no
ENSONIG00000000536	ENSONIG00000000536	ITSN2 (2 of 2)	GL831143.1:933084-972636	q1	q2	OK	5.92518	7.2335	0.287833	1.16526	0.0393	0.100963	no
ENSONIG00000000537	ENSONIG00000000537	AGT	GL831135.1:2181072-2183418	q1	q2	NOTEST	4.15219	3.91866	-0.0835134	0	1	1	no
ENSONIG00000000538	ENSONIG00000000538	CPNE1	GL831191.1:2279573-2307014	q1	q2	OK	11.4491	8.38681	-0.449044	-2.16838	0.0003	0.00186802	yes
ENSONIG00000000539	ENSONIG00000000539	-	GL831399.1:739906-744258	q1	q2	OK	3.90208	4.92461	0.335765	0.627472	0.2686	0.412913	no
ENSONIG00000000540	ENSONIG00000000540	FAM58A	GL831399.1:755788-766408	q1	q2	OK	4.76888	3.22838	-0.56284	-1.36514	0.01655	0.0518341	no
ENSONIG00000000541	ENSONIG00000000541	COG2	GL831135.1:2185820-2194985	q1	q2	NOTEST	3.75457	2.36659	-0.665838	0	1	1	no
ENSONIG00000000542	ENSONIG00000000542	SRP19	GL831312.1:62001-64383	q1	q2	OK	87.8353	72.1934	-0.282934	-0.894012	0.11755	0.227285	no
ENSONIG00000000543	ENSONIG00000000543	ATP2B3	GL831399.1:793363-848820	q1	q2	NOTEST	0.257811	0.177986	-0.534548	0	1	1	no
ENSONIG00000000544	ENSONIG00000000544	RTDR1	GL831312.1:66762-69647	q1	q2	NOTEST	0.803576	0.995877	0.309533	0	1	1	no
ENSONIG00000000545	ENSONIG00000000545	PGBD5	GL831135.1:2196210-2223076	q1	q2	NOTEST	0.458832	0.622117	0.439221	0	1	1	no
ENSONIG00000000546	ENSONIG00000000546	LDB3	GL831312.1:85995-103060	q1	q2	NOTEST	2.23565	3.46397	0.631736	0	1	1	no
ENSONIG00000000547	ENSONIG00000000547	KLF5 (1 of 2)	GL831135.1:2246184-2252697	q1	q2	NOTEST	0.837405	0.241483	-1.794	0	1	1	no
ENSONIG00000000548	ENSONIG00000000548	-	GL831191.1:2307452-2338502	q1	q2	NOTEST	0.0895702	0.131887	0.558211	0	1	1	no
ENSONIG00000000549	ENSONIG00000000549	TRIM9	GL831153.1:558155-599783	q1	q2	NOTEST	0.239264	0.357751	0.580355	0	1	1	no
ENSONIG00000000550	ENSONIG00000000550	PIBF1	GL831135.1:2254578-2289621	q1	q2	NOTEST	0.129013	0	#NAME?	0	1	1	no
ENSONIG00000000551	ENSONIG00000000551	-	GL831143.1:980826-986719	q1	q2	NOTEST	0.0782624	0.365253	2.22251	0	1	1	no
ENSONIG00000000552	ENSONIG00000000552	ASAP1	GL831191.1:2342190-2362523	q1	q2	NOTEST	0	0	0	0	1	1	no
ENSONIG00000000553	ENSONIG00000000553	TMX1	GL831153.1:622512-627188	q1	q2	OK	13.3915	9.9709	-0.425525	-0.8659	0.1099	0.217689	no
ENSONIG00000000554	ENSONIG00000000554	LPIN1 (1 of 2)	GL831143.1:993281-1000858	q1	q2	OK	3.18709	6.53353	1.03562	2.2589	0.00015	0.00102427	yes
ENSONIG00000000555	ENSONIG00000000555	DIS3	GL831135.1:2254578-2289621	q1	q2	NOTEST	1.84899	0.923629	-1.00135	0	1	1	no
ENSONIG00000000556	ENSONIG00000000556	FRMD6	GL831153.1:674308-701552	q1	q2	NOTEST	1.49294	1.31958	-0.178079	0	1	1	no
ENSONIG00000000557	ENSONIG00000000557	-	GL831312.1:112496-117119	q1	q2	NOTEST	0.246368	0.25505	0.0499654	0	1	1	no
ENSONIG00000000558	ENSONIG00000000558	-	GL831312.1:125259-132370	q1	q2	OK	6.1335	7.8776	0.361046	0.431883	0.3984	0.542442	no
ENSONIG00000000559	ENSONIG00000000559	GNG2	GL831153.1:726521-728262	q1	q2	OK	52.8018	85.1476	0.689378	0.87155	0.11165	0.219977	no
ENSONIG00000000560	ENSONIG00000000560	MAK16	GL831312.1:132477-139203	q1	q2	OK	17.3663	16.0811	-0.110918	-0.689032	0.23255	0.374714	no
ENSONIG00000000561	ENSONIG00000000561	DUSP23	GL831153.1:731183-731988	q1	q2	NOTEST	0.495621	0.514308	0.0533942	0	1	1	no
ENSONIG00000000562	ENSONIG00000000562	SLC22A3	GL831153.1:748127-751520	q1	q2	NOTEST	0	0	0	0	1	1	no
ENSONIG00000000563	ENSONIG00000000563	BORA	GL831135.1:2254578-2289621	q1	q2	NOTEST	0.655807	0.438772	-0.5798	0	1	1	no
ENSONIG00000000564	ENSONIG00000000564	TXLNB (1 of 2)	GL831153.1:757566-761099	q1	q2	NOTEST	0.125802	0	#NAME?	0	1	1	no
ENSONIG00000000565	ENSONIG00000000565	-	GL831191.1:2368924-2374943	q1	q2	OK	6.44704	6.0556	-0.0903663	-0.144319	0.8027	0.872633	no
ENSONIG00000000566	ENSONIG00000000566	-	GL831312.1:143224-154573	q1	q2	NOTEST	0.985198	0.828044	-0.250707	0	1	1	no
ENSONIG00000000567	ENSONIG00000000567	HIVEP2 (2 of 2)	GL831153.1:766156-774009	q1	q2	NOTEST	0.560587	1.19224	1.08866	0	1	1	no
ENSONIG00000000568	ENSONIG00000000568	-	GL831135.1:2302316-2324814	q1	q2	OK	23.0257	32.3682	0.491327	2.64573	5e-05	0.000373456	yes
ENSONIG00000000569	ENSONIG00000000569	FUCA2	GL831153.1:780197-785383	q1	q2	NOTEST	3.062	2.26346	-0.435949	0	1	1	no
ENSONIG00000000570	ENSONIG00000000570	GPATCH2	GL831143.1:1007635-1019153	q1	q2	NOTEST	2.32458	1.33361	-0.801637	0	1	1	no
ENSONIG00000000571	ENSONIG00000000571	-	GL831191.1:2412874-2421881	q1	q2	NOTEST	3.42226	3.11375	-0.136295	0	1	1	no
ENSONIG00000000572	ENSONIG00000000572	-	GL831312.1:161055-166777	q1	q2	NOTEST	3.17999	2.40605	-0.402358	0	1	1	no
ENSONIG00000000573	ENSONIG00000000573	ESRRG (2 of 2)	GL831143.1:1033108-1055297	q1	q2	NOTEST	0	0	0	0	1	1	no
ENSONIG00000000574	ENSONIG00000000574	REM1	GL831191.1:2502810-2509141	q1	q2	NOTEST	3.56177	2.05923	-0.790488	0	1	1	no
ENSONIG00000000575	ENSONIG00000000575	ADCK3 (1 of 2)	GL831153.1:791346-803953	q1	q2	NOTEST	1.85189	0.955263	-0.955025	0	1	1	no
ENSONIG00000000576	ENSONIG00000000576	-	GL831474.1:2985-13182	q1	q2	NOTEST	0	0	0	0	1	1	no
ENSONIG00000000577	ENSONIG00000000577	-	GL831191.1:2527187-2536376	q1	q2	NOTEST	0	0	0	0	1	1	no
ENSONIG00000000578	ENSONIG00000000578	LRRC2	GL831312.1:170470-175641	q1	q2	NOTEST	1.49204	0.682454	-1.12848	0	1	1	no
ENSONIG00000000579	ENSONIG00000000579	UBAC2	GL831135.1:2327081-2335822	q1	q2	OK	6.17643	5.72905	-0.108477	-0.34446	0.55835	0.686369	no
ENSONIG00000000580	ENSONIG00000000580	-	GL831143.1:1060277-1063689	q1	q2	NOTEST	0	0	0	0	1	1	no
ENSONIG00000000581	ENSONIG00000000581	FEZ2 (1 of 2)	GL831143.1:1068628-1078716	q1	q2	NOTEST	1.55295	1.5181	-0.0327473	0	1	1	no
ENSONIG00000000582	ENSONIG00000000582	TRIB3	GL831191.1:2560489-2565537	q1	q2	OK	11.0677	14.4547	0.385173	1.25106	0.0276	0.0772481	no
ENSONIG00000000583	ENSONIG00000000583	ANK3 (1 of 2)	GL831135.1:2410998-2471320	q1	q2	NOTEST	0.484838	0.670061	0.46679	0	1	1	no
ENSONIG00000000584	ENSONIG00000000584	ATRIP	GL831191.1:2568063-2585215	q1	q2	NOTEST	1.28856	0.391201	-1.71978	0	1	1	no
ENSONIG00000000585	ENSONIG00000000585	NUDT18	GL831312.1:235963-244068	q1	q2	NOTEST	3.96312	3.22175	-0.298791	0	1	1	no
ENSONIG00000000586	ENSONIG00000000586	SLC30A3	GL831153.1:804911-808861	q1	q2	NOTEST	1.01304	1.61446	0.67236	0	1	1	no
ENSONIG00000000587	ENSONIG00000000587	C7orf43 (2 of 2)	GL831474.1:183698-201147	q1	q2	NOTEST	0	0	0	0	1	1	no
ENSONIG00000000588	ENSONIG00000000588	WDR26	GL831143.1:1079086-1096034	q1	q2	OK	11.1896	13.9407	0.317154	1.82472	0.0018	0.00858241	yes
ENSONIG00000000589	ENSONIG00000000589	ERCC6L	GL831312.1:284730-288429	q1	q2	NOTEST	0.227628	0.379172	0.736176	0	1	1	no
ENSONIG00000000590	ENSONIG00000000590	OGDH	GL831312.1:324256-349304	q1	q2	OK	33.9693	34.6282	0.0277126	0.2819	0.61525	0.734353	no
ENSONIG00000000591	ENSONIG00000000591	HES5 (2 of 4)	GL831191.1:2657223-2658769	q1	q2	NOTEST	3.07605	1.67967	-0.8729	0	1	1	no
ENSONIG00000000592	ENSONIG00000000592	HES5 (4 of 4)	GL831191.1:2661635-2662225	q1	q2	NOTEST	0	0	0	0	1	1	no
ENSONIG00000000593	ENSONIG00000000593	GAL3ST4	GL831474.1:206193-209125	q1	q2	NOTEST	0	0	0	0	1	1	no
ENSONIG00000000594	ENSONIG00000000594	PANK4	GL831191.1:2664830-2683208	q1	q2	NOTEST	0.440758	0.458782	0.0578225	0	1	1	no
ENSONIG00000000595	ENSONIG00000000595	LPAR5	GL831474.1:254464-260299	q1	q2	NOTEST	0	0	0	0	1	1	no
ENSONIG00000000596	ENSONIG00000000596	MBLAC1	GL831474.1:262231-265110	q1	q2	OK	13.239	15.4707	0.224753	0.365242	0.5078	0.643075	no
ENSONIG00000000597	ENSONIG00000000597	DNAJC5G (2 of 2)	GL831153.1:811939-815877	q1	q2	OK	6.02609	5.86086	-0.04011	-0.0415857	0.9384	0.963369	no
ENSONIG00000000598	ENSONIG00000000598	MPDU1 (1 of 2)	GL831474.1:271720-278960	q1	q2	OK	10.8845	8.48213	-0.359778	-0.866304	0.13105	0.247277	no
ENSONIG00000000599	ENSONIG00000000599	ADCY3	GL831143.1:1096732-1110796	q1	q2	NOTEST	1.15819	0.626145	-0.887307	0	1	1	no
ENSONIG00000000600	ENSONIG00000000600	TP53I3	GL831153.1:818851-823993	q1	q2	NOTEST	0.245902	0.251159	0.030514	0	1	1	no
ENSONIG00000000601	ENSONIG00000000601	CENPO	GL831153.1:825173-829352	q1	q2	NOTEST	0.0610059	0.565487	3.21247	0	1	1	no
ENSONIG00000000602	ENSONIG00000000602	SOX19	GL831474.1:281999-285857	q1	q2	NOTEST	1.45289	4.00966	1.46455	0	1	1	no
ENSONIG00000000603	ENSONIG00000000603	NAGA	GL831143.1:1116936-1125362	q1	q2	NOTEST	2.56149	2.01329	-0.347431	0	1	1	no
ENSONIG00000000604	ENSONIG00000000604	SLC5A6 (2 of 2)	GL831153.1:829586-841613	q1	q2	NOTEST	2.99693	2.10586	-0.509081	0	1	1	no
ENSONIG00000000605	ENSONIG00000000605	C1ORF187	GL831191.1:2687019-2707534	q1	q2	NOTEST	2.98513	2.00697	-0.572772	0	1	1	no
ENSONIG00000000606	ENSONIG00000000606	EIF4A1	GL831474.1:291037-296456	q1	q2	OK	159.785	157.88	-0.0173088	-0.21707	0.70095	0.801359	no
ENSONIG00000000607	ENSONIG00000000607	CCDC6	GL831135.1:2479669-2500884	q1	q2	OK	6.97689	7.11673	0.028631	0.135697	0.8182	0.883072	no
ENSONIG00000000608	ENSONIG00000000608	AGTRAP	GL831191.1:2714422-2728395	q1	q2	NOTEST	0.641338	0.441074	-0.540062	0	1	1	no
ENSONIG00000000609	ENSONIG00000000609	MRPS18A	GL831143.1:1254879-1264268	q1	q2	OK	4.84448	3.15185	-0.620143	-0.505399	0.37045	0.516691	no
ENSONIG00000000610	ENSONIG00000000610	SLC16A9	GL831135.1:2502138-2508405	q1	q2	OK	91.6622	124.52	0.441974	5.57625	5e-05	0.000373456	yes
ENSONIG00000000611	ENSONIG00000000611	RSPH9	GL831143.1:1254879-1264268	q1	q2	NOTEST	1.40593	1.11766	-0.331045	0	1	1	no
ENSONIG00000000612	ENSONIG00000000612	RNF207	GL831191.1:2732787-2763500	q1	q2	NOTEST	1.34163	1.73005	0.366828	0	1	1	no
ENSONIG00000000613	ENSONIG00000000613	FAM13C	GL831135.1:2508575-2540893	q1	q2	OK	7.53666	11.9618	0.666442	2.15	0.00095	0.00500381	yes
ENSONIG00000000614	ENSONIG00000000614	TMEM63A	GL831143.1:1279679-1293847	q1	q2	NOTEST	1.62055	1.32406	-0.291518	0	1	1	no
ENSONIG00000000615	ENSONIG00000000615	RPL22 (2 of 2)	GL831191.1:2732787-2763500	q1	q2	OK	541.077	681.41	0.33269	4.41471	5e-05	0.000373456	yes
ENSONIG00000000616	ENSONIG00000000616	-	GL831312.1:352502-367033	q1	q2	OK	6.59363	9.08957	0.46314	1.56454	0.0055	0.0212206	yes
ENSONIG00000000617	ENSONIG00000000617	LRCH4	GL831474.1:316538-347910	q1	q2	OK	5.09555	7.11827	0.48229	1.18205	0.03585	0.0939811	no
ENSONIG00000000618	ENSONIG00000000618	PHYHIPL (1 of 2)	GL831135.1:2508575-2540893	q1	q2	OK	9.02129	10.5175	0.221383	0.79381	0.1654	0.291618	no
ENSONIG00000000619	ENSONIG00000000619	CHD5	GL831191.1:2770983-2801369	q1	q2	OK	5.22895	8.56137	0.711319	3.75749	5e-05	0.000373456	yes
ENSONIG00000000620	ENSONIG00000000620	BICC1	GL831135.1:2547505-2605318	q1	q2	NOTEST	0.819159	0.989838	0.27305	0	1	1	no
ENSONIG00000000621	ENSONIG00000000621	GPRC6A (2 of 2)	GL831143.1:1298283-1304983	q1	q2	NOTEST	0	0	0	0	1	1	no
ENSONIG00000000622	ENSONIG00000000622	H2AFZ	GL831474.1:360345-362334	q1	q2	OK	19.4766	26.2044	0.428069	1.49355	0.0115	0.038655	yes
ENSONIG00000000623	ENSONIG00000000623	GPRC6A (1 of 2)	GL831143.1:1321972-1328929	q1	q2	NOTEST	0	0	0	0	1	1	no
ENSONIG00000000624	ENSONIG00000000624	GPR113	GL831153.1:847589-853134	q1	q2	NOTEST	0	0	0	0	1	1	no
ENSONIG00000000625	ENSONIG00000000625	SMC6	GL831153.1:880716-895989	q1	q2	NOTEST	0.0913229	0.127424	0.480592	0	1	1	no
ENSONIG00000000626	ENSONIG00000000626	UBE2D1	GL831135.1:2606464-2611710	q1	q2	NOTEST	4.18549	1.956	-1.09749	0	1	1	no
ENSONIG00000000627	ENSONIG00000000627	ARHGEF10L (1 of 2)	GL831191.1:2803179-2915897	q1	q2	NOTEST	3.28452	4.21202	0.35883	0	1	1	no
ENSONIG00000000628	ENSONIG00000000628	FAXC (1 of 2)	GL831143.1:1375767-1386672	q1	q2	NOTEST	2.12357	2.37161	0.159378	0	1	1	no
ENSONIG00000000629	ENSONIG00000000629	-	GL831312.1:370802-373846	q1	q2	OK	753.622	944.752	0.326094	3.78458	5e-05	0.000373456	yes
ENSONIG00000000630	ENSONIG00000000630	RGS7	GL831135.1:2641145-2665895	q1	q2	NOTEST	4.02767	3.45805	-0.219989	0	1	1	no
ENSONIG00000000631	ENSONIG00000000631	CCNC	GL831143.1:1387905-1408295	q1	q2	NOTEST	4.29621	3.05196	-0.49333	0	1	1	no
ENSONIG00000000632	ENSONIG00000000632	SLC18A1	GL831312.1:394768-405537	q1	q2	NOTEST	0	0.211983	inf	0	1	1	no
ENSONIG00000000633	ENSONIG00000000633	VSNL1 (2 of 2)	GL831153.1:901555-908274	q1	q2	NOTEST	0.0633233	0	#NAME?	0	1	1	no
ENSONIG00000000634	ENSONIG00000000634	-	GL831153.1:909276-915431	q1	q2	NOTEST	0.370958	0.264425	-0.488399	0	1	1	no
ENSONIG00000000635	ENSONIG00000000635	-	GL831143.1:1387905-1408295	q1	q2	NOTEST	0.135332	0	#NAME?	0	1	1	no
ENSONIG00000000636	ENSONIG00000000636	LACE1	GL831153.1:916550-928558	q1	q2	NOTEST	0.527876	0.08957	-2.55911	0	1	1	no
ENSONIG00000000637	ENSONIG00000000637	IGSF21	GL831191.1:3048901-3218819	q1	q2	NOTEST	0.0929291	0.564929	2.60387	0	1	1	no
ENSONIG00000000638	ENSONIG00000000638	FOXO3 (2 of 2)	GL831153.1:933294-939885	q1	q2	NOTEST	0	0.219935	inf	0	1	1	no
ENSONIG00000000639	ENSONIG00000000639	C6ORF183	GL831153.1:944878-952928	q1	q2	NOTEST	0	0.150715	inf	0	1	1	no
ENSONIG00000000640	ENSONIG00000000640	AADACL4	GL831191.1:3228910-3240684	q1	q2	NOTEST	0	0.10932	inf	0	1	1	no
ENSONIG00000000641	ENSONIG00000000641	TTI2	GL831312.1:422004-426020	q1	q2	NOTEST	1.89411	2.60822	0.461549	0	1	1	no
ENSONIG00000000642	ENSONIG00000000642	DHRS3	GL831191.1:3228910-3240684	q1	q2	NOTEST	0.823373	0.194614	-2.08093	0	1	1	no
ENSONIG00000000643	ENSONIG00000000643	-	GL831153.1:954505-973362	q1	q2	NOTEST	0.201781	0	#NAME?	0	1	1	no
ENSONIG00000000644	ENSONIG00000000644	PGM3	GL831143.1:1408832-1414622	q1	q2	OK	9.43999	6.64347	-0.506849	-1.69449	0.0043	0.0175261	yes
ENSONIG00000000645	ENSONIG00000000645	C5	GL831312.1:430097-458077	q1	q2	NOTEST	0.0255949	0.0549824	1.10311	0	1	1	no
ENSONIG00000000646	ENSONIG00000000646	ZBTB24	GL831153.1:954505-973362	q1	q2	NOTEST	0.48933	0.0264351	-4.21028	0	1	1	no
ENSONIG00000000647	ENSONIG00000000647	LRRC38	GL831191.1:3271565-3284303	q1	q2	NOTEST	0.43515	2.19679	2.33581	0	1	1	no
ENSONIG00000000648	ENSONIG00000000648	EPHB2 (1 of 2)	GL831191.1:3317731-3435943	q1	q2	NOTEST	1.42536	2.24348	0.654414	0	1	1	no
ENSONIG00000000649	ENSONIG00000000649	DDO	GL831153.1:977191-982475	q1	q2	NOTEST	0.73997	1.79876	1.28146	0	1	1	no
ENSONIG00000000650	ENSONIG00000000650	GREM2	GL831135.1:2672952-2673531	q1	q2	NOTEST	0.93842	0.412727	-1.18505	0	1	1	no
ENSONIG00000000651	ENSONIG00000000651	FMN2 (2 of 2)	GL831135.1:2691174-2711775	q1	q2	NOTEST	0.046076	0.192074	2.05958	0	1	1	no
ENSONIG00000000652	ENSONIG00000000652	SAMD5	GL831153.1:987339-1034981	q1	q2	NOTEST	0.146172	0.969001	2.72883	0	1	1	no
ENSONIG00000000653	ENSONIG00000000653	-	GL831135.1:2818155-2905802	q1	q2	NOTEST	0.0091199	0	#NAME?	0	1	1	no
ENSONIG00000000654	ENSONIG00000000654	STXBP5 (2 of 2)	GL831153.1:1035218-1065834	q1	q2	NOTEST	3.86841	3.97686	0.0398907	0	1	1	no
ENSONIG00000000655	ENSONIG00000000655	SNAP91 (2 of 2)	GL831143.1:1417608-1443264	q1	q2	OK	5.27614	6.71713	0.348363	0.968198	0.08885	0.187572	no
ENSONIG00000000656	ENSONIG00000000656	-	GL831143.1:1466933-1469139	q1	q2	NOTEST	0	0	0	0	1	1	no
ENSONIG00000000657	ENSONIG00000000657	-	GL831143.1:1478691-1480683	q1	q2	NOTEST	0	0	0	0	1	1	no
ENSONIG00000000658	ENSONIG00000000658	-	GL831143.1:1498349-1501071	q1	q2	NOTEST	0	0	0	0	1	1	no
ENSONIG00000000659	ENSONIG00000000659	-	GL831143.1:1537764-1538740	q1	q2	NOTEST	0	0	0	0	1	1	no
ENSONIG00000000660	ENSONIG00000000660	-	GL831143.1:1551549-1552788	q1	q2	NOTEST	0	0	0	0	1	1	no
ENSONIG00000000661	ENSONIG00000000661	PRSS35 (2 of 2)	GL831143.1:1555241-1556939	q1	q2	NOTEST	0	0	0	0	1	1	no
ENSONIG00000000662	ENSONIG00000000662	-	GL831143.1:1558264-1559747	q1	q2	NOTEST	0	0	0	0	1	1	no
ENSONIG00000000663	ENSONIG00000000663	FAM46A (2 of 2)	GL831143.1:1583691-1589809	q1	q2	NOTEST	1.56906	2.02753	0.369826	0	1	1	no
ENSONIG00000000664	ENSONIG00000000664	PRDM12 (2 of 2)	GL831312.1:493995-499973	q1	q2	NOTEST	0	0	0	0	1	1	no
ENSONIG00000000665	ENSONIG00000000665	ELOVL4 (2 of 2)	GL831143.1:1632193-1645331	q1	q2	OK	7.28167	6.99698	-0.0575372	-0.20038	0.7262	0.818618	no
ENSONIG00000000666	ENSONIG00000000666	FUBP3 (2 of 2)	GL831312.1:509652-525612	q1	q2	NOTEST	3.26627	1.92452	-0.763143	0	1	1	no
ENSONIG00000000667	ENSONIG00000000667	-	GL831143.1:1646636-1653969	q1	q2	OK	3.81969	4.98564	0.384326	1.00384	0.0859	0.183065	no
ENSONIG00000000668	ENSONIG00000000668	-	GL831153.1:1070225-1072137	q1	q2	NOTEST	0	0	0	0	1	1	no
ENSONIG00000000669	ENSONIG00000000669	GRM1 (1 of 2)	GL831153.1:1074090-1099836	q1	q2	NOTEST	0	0	0	0	1	1	no
ENSONIG00000000670	ENSONIG00000000670	-	GL831143.1:1678599-1681372	q1	q2	NOTEST	0.374064	0.386084	0.0456286	0	1	1	no
ENSONIG00000000671	ENSONIG00000000671	HDDC2	GL831143.1:1692244-1693696	q1	q2	NOTEST	2.52769	2.09623	-0.270026	0	1	1	no
ENSONIG00000000672	ENSONIG00000000672	TPD52L1	GL831143.1:1696471-1703629	q1	q2	NOTEST	4.4505	1.73475	-1.35924	0	1	1	no
ENSONIG00000000673	ENSONIG00000000673	RNF217	GL831143.1:1710913-1729736	q1	q2	OK	9.59546	11.4485	0.25474	1.57035	0.00665	0.0248496	yes
ENSONIG00000000674	ENSONIG00000000674	NKAIN2	GL831143.1:1730776-1839426	q1	q2	NOTEST	3.10615	2.89938	-0.0993811	0	1	1	no
ENSONIG00000000675	ENSONIG00000000675	LACTBL1 (1 of 2)	GL831191.1:3475487-3496871	q1	q2	NOTEST	0	0	0	0	1	1	no
ENSONIG00000000676	ENSONIG00000000676	-	GL831191.1:3498556-3506536	q1	q2	NOTEST	0	0	0	0	1	1	no
ENSONIG00000000677	ENSONIG00000000677	SURF4 (2 of 2)	GL831312.1:556535-561788	q1	q2	OK	15.4172	9.76361	-0.659056	-1.2765	0.02845	0.0788898	no
ENSONIG00000000678	ENSONIG00000000678	TRDN	GL831143.1:1863497-1888567	q1	q2	NOTEST	0	0	0	0	1	1	no
ENSONIG00000000679	ENSONIG00000000679	-	GL831191.1:3535675-3537457	q1	q2	NOTEST	0	0	0	0	1	1	no
ENSONIG00000000680	ENSONIG00000000680	AKAP7	GL831143.1:1953364-1997365	q1	q2	OK	4.9068	4.17763	-0.232096	-0.645547	0.2535	0.395304	no
ENSONIG00000000681	ENSONIG00000000681	-	GL831191.1:3538980-3568355	q1	q2	NOTEST	0.620144	0.607694	-0.0292578	0	1	1	no
ENSONIG00000000682	ENSONIG00000000682	ALPL	GL831191.1:3589285-3627228	q1	q2	NOTEST	4.48561	3.39613	-0.401411	0	1	1	no
ENSONIG00000000683	ENSONIG00000000683	MED23	GL831143.1:2016371-2035543	q1	q2	NOTEST	2.70745	1.17737	-1.20137	0	1	1	no
ENSONIG00000000684	ENSONIG00000000684	SHPRH	GL831153.1:1101679-1116008	q1	q2	NOTEST	2.66398	1.95522	-0.446255	0	1	1	no
ENSONIG00000000685	ENSONIG00000000685	-	GL831153.1:1120303-1123049	q1	q2	NOTEST	0.341219	0.325557	-0.0677871	0	1	1	no
ENSONIG00000000686	ENSONIG00000000686	KAZALD1	GL831312.1:569055-571529	q1	q2	NOTEST	0	0	0	0	1	1	no
ENSONIG00000000687	ENSONIG00000000687	FBXO30	GL831153.1:1124279-1127702	q1	q2	NOTEST	0.32737	0.311651	-0.070993	0	1	1	no
ENSONIG00000000688	ENSONIG00000000688	-	GL831153.1:1153219-1157927	q1	q2	NOTEST	0	0	0	0	1	1	no
ENSONIG00000000689	ENSONIG00000000689	GRIN1 (2 of 2)	GL831312.1:582905-659712	q1	q2	NOTEST	0.0533555	0	#NAME?	0	1	1	no
ENSONIG00000000690	ENSONIG00000000690	RMND1	GL831153.1:1164619-1169277	q1	q2	NOTEST	2.37974	0.672905	-1.82233	0	1	1	no
ENSONIG00000000691	ENSONIG00000000691	IL20RA	GL831143.1:2036895-2042045	q1	q2	NOTEST	0.157697	0	#NAME?	0	1	1	no
ENSONIG00000000692	ENSONIG00000000692	SYNE1 (1 of 2)	GL831153.1:1173339-1247040	q1	q2	NOTEST	0.0329669	0.0552402	0.744701	0	1	1	no
ENSONIG00000000693	ENSONIG00000000693	EHD3	GL831143.1:2047759-2065655	q1	q2	NOTEST	1.59778	1.3238	-0.271377	0	1	1	no
ENSONIG00000000694	ENSONIG00000000694	ECE1	GL831191.1:3629258-3655949	q1	q2	OK	6.46692	6.00428	-0.107088	-0.38249	0.508	0.643075	no
ENSONIG00000000695	ENSONIG00000000695	C1ORF95	GL831143.1:2104953-2122680	q1	q2	NOTEST	0	0.146195	inf	0	1	1	no
ENSONIG00000000696	ENSONIG00000000696	ADCK3 (2 of 2)	GL831143.1:2131648-2152780	q1	q2	OK	4.80258	2.65563	-0.854756	-1.51472	0.015	0.0479101	yes
ENSONIG00000000697	ENSONIG00000000697	EIF4G3	GL831191.1:3676327-3746935	q1	q2	OK	6.87204	7.38238	0.103347	0.426789	0.45445	0.593816	no
ENSONIG00000000698	ENSONIG00000000698	ITPKB	GL831143.1:2156937-2176395	q1	q2	NOTEST	0.807386	0.880115	0.124433	0	1	1	no
ENSONIG00000000699	ENSONIG00000000699	EPB41L2	GL831143.1:2194820-2244437	q1	q2	OK	4.77614	4.9334	0.0467355	0.127234	0.82995	0.891013	no
ENSONIG00000000700	ENSONIG00000000700	DOK2	GL831312.1:676330-734857	q1	q2	NOTEST	1.17132	0.543359	-1.10815	0	1	1	no
ENSONIG00000000701	ENSONIG00000000701	TSC1 (2 of 2)	GL831312.1:676330-734857	q1	q2	NOTEST	4.31385	4.53148	0.0710063	0	1	1	no
ENSONIG00000000702	ENSONIG00000000702	MYCT1 (2 of 2)	GL831153.1:1250159-1251577	q1	q2	NOTEST	1.14094	0	#NAME?	0	1	1	no
ENSONIG00000000703	ENSONIG00000000703	TULP4 (2 of 2)	GL831153.1:1255187-1264559	q1	q2	NOTEST	0.225951	0.208188	-0.118126	0	1	1	no
ENSONIG00000000704	ENSONIG00000000704	AK8	GL831312.1:676330-734857	q1	q2	NOTEST	1.04481	1.59681	0.611949	0	1	1	no
ENSONIG00000000705	ENSONIG00000000705	HP1BP3	GL831191.1:3750788-3756902	q1	q2	OK	5.39868	4.28295	-0.334002	-0.608931	0.30455	0.450768	no
ENSONIG00000000706	ENSONIG00000000706	-	GL831149.1:6922-40811	q1	q2	OK	14.6179	24.2849	0.732321	4.27523	5e-05	0.000373456	yes
ENSONIG00000000707	ENSONIG00000000707	SLC18B1	GL831153.1:1268309-1274868	q1	q2	NOTEST	2.65291	1.72402	-0.621795	0	1	1	no
ENSONIG00000000708	ENSONIG00000000708	TMEM200A	GL831143.1:2292733-2298923	q1	q2	NOTEST	3.77743	3.98496	0.0771613	0	1	1	no
ENSONIG00000000709	ENSONIG00000000709	KIF17	GL831191.1:3766504-3795383	q1	q2	NOTEST	0.228449	0.143441	-0.671421	0	1	1	no
ENSONIG00000000710	ENSONIG00000000710	KCNH6 (1 of 2)	GL831149.1:6922-40811	q1	q2	OK	14.901	35.4656	1.25102	6.66934	5e-05	0.000373456	yes
ENSONIG00000000711	ENSONIG00000000711	DDX31	GL831312.1:738721-750020	q1	q2	OK	22.9178	24.5315	0.0981671	0.505696	0.38285	0.527667	no
ENSONIG00000000712	ENSONIG00000000712	AHI1	GL831153.1:1284007-1294840	q1	q2	NOTEST	0.422771	0.295731	-0.515592	0	1	1	no
ENSONIG00000000713	ENSONIG00000000713	TMEM244	GL831143.1:2318975-2326725	q1	q2	NOTEST	0	0	0	0	1	1	no
ENSONIG00000000714	ENSONIG00000000714	FKBP6	GL831143.1:2327760-2333596	q1	q2	NOTEST	0.344579	0.361473	0.0690518	0	1	1	no
ENSONIG00000000715	ENSONIG00000000715	ACTN2	GL831135.1:2913440-2932371	q1	q2	NOTEST	0.0924685	0.0307559	-1.5881	0	1	1	no
ENSONIG00000000716	ENSONIG00000000716	C1orf116 (2 of 2)	GL831191.1:3799738-3801508	q1	q2	NOTEST	0	0.152916	inf	0	1	1	no
ENSONIG00000000717	ENSONIG00000000717	ARHGAP18	GL831143.1:2335058-2355306	q1	q2	OK	27.1844	41.8098	0.621062	4.11463	5e-05	0.000373456	yes
ENSONIG00000000718	ENSONIG00000000718	-	GL832635.1:3745-5118	q1	q2	NOTEST	0.367943	0.301805	-0.285863	0	1	1	no
ENSONIG00000000719	ENSONIG00000000719	MAP7 (2 of 2)	GL831153.1:1302554-1310839	q1	q2	NOTEST	0.0543693	0	#NAME?	0	1	1	no
ENSONIG00000000720	ENSONIG00000000720	BARHL1	GL831312.1:751301-757550	q1	q2	NOTEST	0.280552	0	#NAME?	0	1	1	no
ENSONIG00000000721	ENSONIG00000000721	OTOF (2 of 2)	GL831153.1:1317302-1335342	q1	q2	NOTEST	0.0593847	0.0832364	0.487123	0	1	1	no
ENSONIG00000000722	ENSONIG00000000722	SEL1L	GL831143.1:2357773-2369003	q1	q2	OK	10.0464	10.1628	0.016623	0.0812448	0.88615	0.928885	no
ENSONIG00000000723	ENSONIG00000000723	QSOX2	GL831312.1:799823-807286	q1	q2	NOTEST	3.38192	2.4062	-0.491087	0	1	1	no
ENSONIG00000000724	ENSONIG00000000724	GFAP	GL831149.1:45318-52126	q1	q2	OK	21.248	20.9709	-0.0189392	-0.115431	0.84105	0.898818	no
ENSONIG00000000725	ENSONIG00000000725	CHGA	GL831143.1:2387035-2394427	q1	q2	NOTEST	0.186275	0.234185	0.33022	0	1	1	no
ENSONIG00000000726	ENSONIG00000000726	PAK2 (2 of 2)	GL831153.1:1338788-1346340	q1	q2	OK	10.6054	8.66235	-0.291975	-0.773797	0.18395	0.315307	no
ENSONIG00000000727	ENSONIG00000000727	NACC2 (1 of 2)	GL831312.1:821510-830806	q1	q2	NOTEST	1.71346	0.994372	-0.785056	0	1	1	no
ENSONIG00000000728	ENSONIG00000000728	MAP3K3	GL831149.1:57654-79781	q1	q2	OK	3.34002	8.45663	1.34023	4.57916	5e-05	0.000373456	yes
ENSONIG00000000729	ENSONIG00000000729	CTGF	GL831143.1:2396001-2398078	q1	q2	OK	123.176	175.5	0.510747	5.19719	5e-05	0.000373456	yes
ENSONIG00000000730	ENSONIG00000000730	CABLES2 (1 of 2)	GL831387.1:49708-98780	q1	q2	NOTEST	0.864643	1.56683	0.857672	0	1	1	no
ENSONIG00000000731	ENSONIG00000000731	BRD3	GL831312.1:842212-855196	q1	q2	OK	14.366	14.5715	0.0204872	0.143034	0.8061	0.875022	no
ENSONIG00000000732	ENSONIG00000000732	C20ORF160	GL831387.1:103431-115739	q1	q2	NOTEST	2.7581	0.869159	-1.66598	0	1	1	no
ENSONIG00000000733	ENSONIG00000000733	STX7	GL831143.1:2432634-2439487	q1	q2	NOTEST	2.25345	0.78965	-1.51285	0	1	1	no
ENSONIG00000000734	ENSONIG00000000734	DDX42	GL831149.1:96825-106061	q1	q2	OK	10.502	8.32794	-0.334631	-1.5169	0.0096	0.0334299	yes
ENSONIG00000000735	ENSONIG00000000735	XKR7 (2 of 2)	GL831387.1:127966-139422	q1	q2	NOTEST	0.674466	0.566546	-0.251553	0	1	1	no
ENSONIG00000000736	ENSONIG00000000736	CDK16	GL831387.1:265827-281624	q1	q2	OK	3.98449	6.92327	0.797058	2.59201	5e-05	0.000373456	yes
ENSONIG00000000737	ENSONIG00000000737	P4HA1 (1 of 2)	GL831135.1:2932400-2945419	q1	q2	NOTEST	0.847256	0.482303	-0.812858	0	1	1	no
ENSONIG00000000738	ENSONIG00000000738	STRADA	GL831149.1:106285-123112	q1	q2	NOTEST	2.37727	1.595	-0.575747	0	1	1	no
ENSONIG00000000739	ENSONIG00000000739	C6ORF58	GL831143.1:2443082-2446262	q1	q2	NOTEST	0.0926436	0.402223	2.11823	0	1	1	no
ENSONIG00000000740	ENSONIG00000000740	HLTF	GL831153.1:1354292-1368837	q1	q2	NOTEST	1.14832	0.890529	-0.366785	0	1	1	no
ENSONIG00000000741	ENSONIG00000000741	RNF113B	GL831149.1:106285-123112	q1	q2	NOTEST	3.75477	2.76717	-0.440314	0	1	1	no
ENSONIG00000000742	ENSONIG00000000742	DPF3 (1 of 2)	GL831143.1:2449623-2462750	q1	q2	NOTEST	0	0	0	0	1	1	no
ENSONIG00000000743	ENSONIG00000000743	ECD	GL831135.1:2956098-2961064	q1	q2	OK	6.01867	3.5821	-0.748638	-1.46755	0.01085	0.036944	yes
ENSONIG00000000744	ENSONIG00000000744	PPAPDC3 (2 of 2)	GL831312.1:859171-863614	q1	q2	NOTEST	0	0	0	0	1	1	no
ENSONIG00000000745	ENSONIG00000000745	-	GL831312.1:880050-883537	q1	q2	NOTEST	0	0.631062	inf	0	1	1	no
ENSONIG00000000746	ENSONIG00000000746	DCAF4L2	GL831143.1:2472114-2476373	q1	q2	OK	4.55363	6.40752	0.492749	0.924084	0.09565	0.198267	no
ENSONIG00000000747	ENSONIG00000000747	CHEK2	GL831312.1:883968-889780	q1	q2	OK	14.1597	17.3683	0.294665	0.947907	0.10335	0.20906	no
ENSONIG00000000748	ENSONIG00000000748	RUNDC3A (1 of 2)	GL831149.1:124006-137895	q1	q2	OK	5.73574	3.76657	-0.606728	-1.33968	0.0263	0.0747067	no
ENSONIG00000000749	ENSONIG00000000749	GYG1 (2 of 2)	GL831153.1:1371705-1380170	q1	q2	NOTEST	1.0646	2.16247	1.02237	0	1	1	no
ENSONIG00000000750	ENSONIG00000000750	ABT1	GL831387.1:284589-287543	q1	q2	OK	13.1816	10.4755	-0.331506	-0.700895	0.21735	0.355967	no
ENSONIG00000000751	ENSONIG00000000751	FAM149B1	GL831135.1:2962164-2972194	q1	q2	NOTEST	0.672885	1.12659	0.743534	0	1	1	no
ENSONIG00000000752	ENSONIG00000000752	PLS1	GL831153.1:1385528-1421268	q1	q2	NOTEST	3.02827	0.933065	-1.69844	0	1	1	no
ENSONIG00000000753	ENSONIG00000000753	RAD51C	GL831387.1:288341-292511	q1	q2	NOTEST	0.299309	0.0862292	-1.79539	0	1	1	no
ENSONIG00000000754	ENSONIG00000000754	ZFYVE1 (1 of 2)	GL831143.1:2477941-2482196	q1	q2	NOTEST	4.45913	1.98544	-1.16731	0	1	1	no
ENSONIG00000000755	ENSONIG00000000755	GRM6 (2 of 2)	GL831387.1:296697-316577	q1	q2	NOTEST	0	0.399926	inf	0	1	1	no
ENSONIG00000000756	ENSONIG00000000756	DNAJC9	GL831135.1:2972815-2978422	q1	q2	OK	29.1352	31.6166	0.117922	0.440632	0.44545	0.585462	no
ENSONIG00000000757	ENSONIG00000000757	FAM117A (1 of 2)	GL831149.1:139270-147351	q1	q2	NOTEST	0.0876104	0	#NAME?	0	1	1	no
ENSONIG00000000758	ENSONIG00000000758	SLC35B1	GL831149.1:149314-154790	q1	q2	OK	40.9957	26.4141	-0.634166	-2.35443	0.0002	0.00131707	yes
ENSONIG00000000759	ENSONIG00000000759	PIGH	GL831143.1:2483705-2487239	q1	q2	OK	5.59611	3.97253	-0.494368	-0.395217	0.4903	0.627109	no
ENSONIG00000000760	ENSONIG00000000760	-	GL831135.1:2981973-2992715	q1	q2	NOTEST	1.50375	0.339006	-2.14918	0	1	1	no
ENSONIG00000000761	ENSONIG00000000761	FAM190B	GL831135.1:3033355-3071504	q1	q2	NOTEST	0.734692	1.28004	0.800976	0	1	1	no
ENSONIG00000000762	ENSONIG00000000762	RHOV (1 of 2)	GL831143.1:2506042-2508934	q1	q2	NOTEST	0.30226	0.188416	-0.681873	0	1	1	no
ENSONIG00000000763	ENSONIG00000000763	TSR2	GL831387.1:332565-337515	q1	q2	OK	18.103	30.1205	0.734517	1.44132	0.0131	0.0430214	yes
ENSONIG00000000764	ENSONIG00000000764	VPS18	GL831143.1:2509645-2515789	q1	q2	NOTEST	3.74093	1.87875	-0.993622	0	1	1	no
ENSONIG00000000765	ENSONIG00000000765	OLFM1 (2 of 2)	GL831312.1:957117-974597	q1	q2	NOTEST	3.29151	2.47078	-0.413786	0	1	1	no
ENSONIG00000000766	ENSONIG00000000766	NDUFA4	GL831149.1:158751-161790	q1	q2	OK	94.4541	106.712	0.176033	1.68315	0.0032	0.0137371	yes
ENSONIG00000000767	ENSONIG00000000767	-	GL831149.1:201528-295637	q1	q2	NOTEST	0.359795	0.134323	-1.42147	0	1	1	no
ENSONIG00000000768	ENSONIG00000000768	GRID1 (2 of 2)	GL831135.1:3165581-3424215	q1	q2	NOTEST	0	0	0	0	1	1	no
ENSONIG00000000769	ENSONIG00000000769	SRPK3	GL831387.1:340846-348405	q1	q2	OK	6.29956	9.70752	0.623852	2.04003	0.00075	0.0040944	yes
ENSONIG00000000770	ENSONIG00000000770	ATR	GL831153.1:1421992-1440513	q1	q2	NOTEST	0.386457	0.264965	-0.544506	0	1	1	no
ENSONIG00000000771	ENSONIG00000000771	FNBP1 (2 of 2)	GL831312.1:1021495-1101393	q1	q2	NOTEST	1.01009	1.30927	0.374281	0	1	1	no
ENSONIG00000000772	ENSONIG00000000772	INO80	GL831143.1:2516056-2557258	q1	q2	NOTEST	1.99181	1.41155	-0.496805	0	1	1	no
ENSONIG00000000773	ENSONIG00000000773	NXPH3 (1 of 2)	GL831149.1:360392-378176	q1	q2	NOTEST	0.344733	0.130706	-1.39915	0	1	1	no
ENSONIG00000000774	ENSONIG00000000774	-	GL831153.1:1477274-1481768	q1	q2	NOTEST	2.78045	2.14067	-0.377252	0	1	1	no
ENSONIG00000000775	ENSONIG00000000775	NGFR (1 of 2)	GL831149.1:453229-479127	q1	q2	NOTEST	0.0617635	0.151212	1.29175	0	1	1	no
ENSONIG00000000776	ENSONIG00000000776	-	GL831149.1:508024-514593	q1	q2	NOTEST	0	0	0	0	1	1	no
ENSONIG00000000777	ENSONIG00000000777	WAPAL (2 of 2)	GL831135.1:3507559-3524769	q1	q2	NOTEST	3.92819	2.04328	-0.942974	0	1	1	no
ENSONIG00000000778	ENSONIG00000000778	SLC4A1 (2 of 2)	GL831149.1:522606-530973	q1	q2	NOTEST	0.442729	0.995955	1.16966	0	1	1	no
ENSONIG00000000779	ENSONIG00000000779	SLC35G2	GL831153.1:1492217-1493549	q1	q2	OK	11.4703	8.09244	-0.503261	-1.14319	0.0441	0.110058	no
ENSONIG00000000780	ENSONIG00000000780	STAG1	GL831153.1:1504526-1543194	q1	q2	NOTEST	2.46768	2.1512	-0.19801	0	1	1	no
ENSONIG00000000781	ENSONIG00000000781	CHAC1 (2 of 2)	GL831143.1:2558928-2560388	q1	q2	OK	1908.28	1410.62	-0.435945	-12.7145	5e-05	0.000373456	yes
ENSONIG00000000782	ENSONIG00000000782	DLL4 (1 of 2)	GL831143.1:2567728-2575721	q1	q2	OK	5.50829	8.19619	0.57335	1.46715	0.01165	0.0390132	yes
ENSONIG00000000783	ENSONIG00000000783	PLXNB3	GL831387.1:356212-414470	q1	q2	NOTEST	0.98592	1.26011	0.354009	0	1	1	no
ENSONIG00000000784	ENSONIG00000000784	HTRA1 (2 of 2)	GL831135.1:3526278-3558423	q1	q2	NOTEST	0.696512	0.512472	-0.442675	0	1	1	no
ENSONIG00000000785	ENSONIG00000000785	MED27	GL831312.1:1116932-1124005	q1	q2	NOTEST	4.54377	3.07389	-0.563825	0	1	1	no
ENSONIG00000000786	ENSONIG00000000786	SYNDIG1L (2 of 2)	GL831143.1:2776568-2818791	q1	q2	NOTEST	0.0946955	0.0275633	-1.78055	0	1	1	no
ENSONIG00000000787	ENSONIG00000000787	VRTN	GL831143.1:2864853-2872847	q1	q2	NOTEST	0.146349	0.347766	1.2487	0	1	1	no
ENSONIG00000000788	ENSONIG00000000788	SLC25A29 (3 of 3)	GL831143.1:2887059-2895031	q1	q2	NOTEST	0.356777	0.30431	-0.229482	0	1	1	no
ENSONIG00000000789	ENSONIG00000000789	NTNG2 (2 of 2)	GL831312.1:1129454-1145958	q1	q2	NOTEST	0	0	0	0	1	1	no
ENSONIG00000000790	ENSONIG00000000790	PLEKHA1 (1 of 2)	GL831135.1:3562883-3575100	q1	q2	OK	6.8964	5.05542	-0.448013	-0.805412	0.18045	0.311515	no
ENSONIG00000000791	ENSONIG00000000791	SLC25A47	GL831143.1:2904615-2909096	q1	q2	OK	6.56315	8.69364	0.405572	0.936476	0.08805	0.186258	no
ENSONIG00000000792	ENSONIG00000000792	ENDOG	GL831312.1:1210171-1211805	q1	q2	OK	7.39116	4.093	-0.852642	-0.955279	0.13935	0.257681	no
ENSONIG00000000793	ENSONIG00000000793	ABCD1	GL831387.1:454025-474968	q1	q2	NOTEST	1.93894	0.873085	-1.15107	0	1	1	no
ENSONIG00000000794	ENSONIG00000000794	PHACTR2	GL831135.1:3606239-3628244	q1	q2	NOTEST	0.342213	0.107255	-1.67384	0	1	1	no
ENSONIG00000000795	ENSONIG00000000795	PPP2R5C	GL831143.1:3001934-3032071	q1	q2	OK	10.5744	12.249	0.212086	1.04576	0.06365	0.14604	no
ENSONIG00000000796	ENSONIG00000000796	UBTF	GL831149.1:535824-540586	q1	q2	NOTEST	2.49822	3.97864	0.671374	0	1	1	no
ENSONIG00000000797	ENSONIG00000000797	-	GL831312.1:1214240-1215675	q1	q2	NOTEST	0	0	0	0	1	1	no
ENSONIG00000000798	ENSONIG00000000798	PCCB	GL831153.1:1545948-1551098	q1	q2	OK	6.26502	5.0733	-0.304395	-0.640793	0.2527	0.39435	no
ENSONIG00000000799	ENSONIG00000000799	-	GL831312.1:1242574-1246336	q1	q2	NOTEST	0	0	0	0	1	1	no
ENSONIG00000000800	ENSONIG00000000800	CCDC120 (2 of 2)	GL831387.1:486550-493883	q1	q2	NOTEST	0	0	0	0	1	1	no
ENSONIG00000000801	ENSONIG00000000801	HCFC1	GL831387.1:524414-548600	q1	q2	OK	5.66415	4.3469	-0.381874	-1.40552	0.01535	0.0486573	yes
ENSONIG00000000802	ENSONIG00000000802	-	GL831312.1:1251172-1262743	q1	q2	NOTEST	0.872692	0.61401	-0.507211	0	1	1	no
ENSONIG00000000803	ENSONIG00000000803	OPRM1	GL831135.1:3652495-3695124	q1	q2	NOTEST	0.112141	0	#NAME?	0	1	1	no
ENSONIG00000000804	ENSONIG00000000804	RGS17	GL831135.1:3758483-3776873	q1	q2	NOTEST	0.310174	0	#NAME?	0	1	1	no
ENSONIG00000000805	ENSONIG00000000805	HSP90AA1 (1 of 2)	GL831143.1:3033201-3039387	q1	q2	OK	1423.42	2408.87	0.758992	42.8236	5e-05	0.000373456	yes
ENSONIG00000000806	ENSONIG00000000806	IRAK1	GL831387.1:549825-563384	q1	q2	NOTEST	3.95659	4.15197	0.0695384	0	1	1	no
ENSONIG00000000807	ENSONIG00000000807	MSL2 (2 of 2)	GL831153.1:1554783-1559918	q1	q2	NOTEST	4.12025	4.30125	0.0620266	0	1	1	no
ENSONIG00000000808	ENSONIG00000000808	PCNXL2	GL831135.1:3792833-3830917	q1	q2	NOTEST	0.0216902	0.182676	3.07417	0	1	1	no
ENSONIG00000000809	ENSONIG00000000809	MECP2	GL831387.1:568860-591791	q1	q2	NOTEST	0.338222	0.540468	0.676239	0	1	1	no
ENSONIG00000000810	ENSONIG00000000810	TNFSF10 (2 of 2)	GL831153.1:1560336-1565643	q1	q2	NOTEST	0.216437	0.0689403	-1.65052	0	1	1	no
ENSONIG00000000811	ENSONIG00000000811	-	GL831312.1:1276755-1283728	q1	q2	NOTEST	0	0	0	0	1	1	no
ENSONIG00000000812	ENSONIG00000000812	ATXN7L3	GL831149.1:545540-552175	q1	q2	NOTEST	0.521145	0.162242	-1.68354	0	1	1	no
ENSONIG00000000813	ENSONIG00000000813	NCEH1 (2 of 2)	GL831153.1:1569174-1576892	q1	q2	NOTEST	0	0.10199	inf	0	1	1	no
ENSONIG00000000814	ENSONIG00000000814	TMUB2	GL831149.1:556126-557647	q1	q2	OK	25.4228	25.3195	-0.005873	-0.0187066	0.9739	0.97935	no
ENSONIG00000000815	ENSONIG00000000815	PPP2R3A	GL831153.1:1619273-1640441	q1	q2	NOTEST	0.879803	1.07525	0.289426	0	1	1	no
ENSONIG00000000816	ENSONIG00000000816	ASB16	GL831149.1:557656-565267	q1	q2	NOTEST	0	0.142196	inf	0	1	1	no
ENSONIG00000000817	ENSONIG00000000817	FGD1	GL831387.1:635278-645591	q1	q2	NOTEST	0	0	0	0	1	1	no
ENSONIG00000000818	ENSONIG00000000818	PHF19	GL831312.1:1309239-1313126	q1	q2	NOTEST	0	0.0968289	inf	0	1	1	no
ENSONIG00000000819	ENSONIG00000000819	HSP90AA1 (2 of 2)	GL831143.1:3039920-3043080	q1	q2	OK	33.3155	27.7528	-0.263561	-1.4656	0.01135	0.0382325	yes
ENSONIG00000000820	ENSONIG00000000820	-	GL831387.1:655956-669318	q1	q2	OK	8.60641	7.69048	-0.162337	-0.393952	0.4847	0.621717	no
ENSONIG00000000821	ENSONIG00000000821	C17ORF53	GL831149.1:566633-579117	q1	q2	NOTEST	0.0365937	0.0480093	0.391718	0	1	1	no
ENSONIG00000000822	ENSONIG00000000822	ASIC2	GL831149.1:839976-965139	q1	q2	NOTEST	0.102676	0.036505	-1.49194	0	1	1	no
ENSONIG00000000823	ENSONIG00000000823	WDR20 (2 of 2)	GL831143.1:3046511-3058266	q1	q2	OK	12.3587	12.7628	0.0464156	0.148361	0.7868	0.863256	no
ENSONIG00000000824	ENSONIG00000000824	-	GL831135.1:3831375-3860977	q1	q2	OK	3.60722	5.19409	0.525984	1.9065	0.0011	0.00564727	yes
ENSONIG00000000825	ENSONIG00000000825	FNDC3B	GL831153.1:1650384-1740520	q1	q2	OK	6.53053	13.2947	1.02557	6.12456	5e-05	0.000373456	yes
ENSONIG00000000826	ENSONIG00000000826	-	GL831387.1:675243-681153	q1	q2	NOTEST	0.264615	0	#NAME?	0	1	1	no
ENSONIG00000000827	ENSONIG00000000827	MPP3 (1 of 2)	GL831149.1:984260-1009555	q1	q2	NOTEST	0.64367	1.09042	0.760496	0	1	1	no
ENSONIG00000000828	ENSONIG00000000828	CXXC1 (2 of 2)	GL831387.1:697020-709684	q1	q2	NOTEST	1.48	1.37683	-0.104246	0	1	1	no
ENSONIG00000000829	ENSONIG00000000829	RPS29	GL831143.1:3068117-3069269	q1	q2	OK	1812.78	2352.68	0.376104	6.45068	5e-05	0.000373456	yes
ENSONIG00000000830	ENSONIG00000000830	DAB2IP (2 of 2)	GL831312.1:1335814-1349558	q1	q2	NOTEST	0.0485128	0.222559	2.19775	0	1	1	no
ENSONIG00000000831	ENSONIG00000000831	MDGA2 (1 of 2)	GL831143.1:3226738-3408825	q1	q2	NOTEST	0.130421	0	#NAME?	0	1	1	no
ENSONIG00000000832	ENSONIG00000000832	IL22RA1	GL831135.1:3861767-3867672	q1	q2	NOTEST	1.87542	4.05376	1.11204	0	1	1	no
ENSONIG00000000833	ENSONIG00000000833	-	GL831135.1:3874073-3880128	q1	q2	OK	16.5506	19.2	0.214222	0.554592	0.3229	0.469313	no
ENSONIG00000000834	ENSONIG00000000834	GSN (2 of 2)	GL831312.1:1350438-1360981	q1	q2	NOTEST	0.366307	0.0748465	-2.29105	0	1	1	no
ENSONIG00000000835	ENSONIG00000000835	RNF112 (2 of 2)	GL831135.1:3987094-4006602	q1	q2	NOTEST	3.4048	2.84704	-0.258108	0	1	1	no
ENSONIG00000000836	ENSONIG00000000836	HDAC6	GL831387.1:710932-726564	q1	q2	NOTEST	4.26918	3.5941	-0.248328	0	1	1	no
ENSONIG00000000837	ENSONIG00000000837	MUC13	GL831149.1:1017677-1027421	q1	q2	OK	4.98624	5.34381	0.099917	0.285819	0.61005	0.730225	no
ENSONIG00000000838	ENSONIG00000000838	-	GL831149.1:1017677-1027421	q1	q2	NOTEST	2.81139	4.63987	0.722801	0	1	1	no
ENSONIG00000000839	ENSONIG00000000839	ZNF281 (1 of 2)	GL831149.1:1045876-1057121	q1	q2	NOTEST	1.23021	0.221237	-2.47524	0	1	1	no
ENSONIG00000000840	ENSONIG00000000840	-	GL831143.1:3226738-3408825	q1	q2	NOTEST	0	0	0	0	1	1	no
ENSONIG00000000841	ENSONIG00000000841	SLC29A1 (1 of 2)	GL831135.1:4010961-4053733	q1	q2	OK	4.77688	4.69493	-0.0249663	-0.0382287	0.94145	0.964453	no
ENSONIG00000000842	ENSONIG00000000842	GHSR	GL831153.1:1747720-1749106	q1	q2	NOTEST	0.32616	0.296601	-0.137058	0	1	1	no
ENSONIG00000000843	ENSONIG00000000843	PLD1 (2 of 2)	GL831153.1:1764160-1785604	q1	q2	NOTEST	0.521783	0.77698	0.574427	0	1	1	no
ENSONIG00000000844	ENSONIG00000000844	-	GL831149.1:1064473-1083934	q1	q2	NOTEST	0.203453	0.101678	-1.00069	0	1	1	no
ENSONIG00000000845	ENSONIG00000000845	FAM160B2	GL831312.1:1381097-1396480	q1	q2	NOTEST	4.27212	3.28003	-0.381243	0	1	1	no
ENSONIG00000000846	ENSONIG00000000846	TMEM98	GL831149.1:1192543-1209970	q1	q2	NOTEST	1.35637	1.93378	0.511674	0	1	1	no
ENSONIG00000000847	ENSONIG00000000847	-	GL831149.1:1192543-1209970	q1	q2	NOTEST	0	0	0	0	1	1	no
ENSONIG00000000848	ENSONIG00000000848	-	GL831149.1:1222451-1228033	q1	q2	NOTEST	0	0	0	0	1	1	no
ENSONIG00000000849	ENSONIG00000000849	FKBP3	GL831143.1:3494124-3498783	q1	q2	OK	185.606	243.227	0.390064	6.23036	5e-05	0.000373456	yes
ENSONIG00000000850	ENSONIG00000000850	RETSAT	GL831149.1:1228107-1237455	q1	q2	NOTEST	3.30535	1.77596	-0.896207	0	1	1	no
ENSONIG00000000851	ENSONIG00000000851	-	GL831135.1:4061295-4063933	q1	q2	NOTEST	1.17569	0.638744	-0.880193	0	1	1	no
ENSONIG00000000852	ENSONIG00000000852	ADSS	GL831135.1:4067080-4093859	q1	q2	NOTEST	0.216139	0.473493	1.13138	0	1	1	no
ENSONIG00000000853	ENSONIG00000000853	DNM1 (1 of 2)	GL831312.1:1420702-1480290	q1	q2	NOTEST	0.311811	0.86529	1.47251	0	1	1	no
ENSONIG00000000854	ENSONIG00000000854	FAU	GL831143.1:3494124-3498783	q1	q2	OK	647.459	913.909	0.497263	3.99746	5e-05	0.000373456	yes
ENSONIG00000000855	ENSONIG00000000855	NMT1 (1 of 2)	GL831149.1:1237525-1247138	q1	q2	OK	12.1601	8.18466	-0.571164	-2.59908	5e-05	0.000373456	yes
ENSONIG00000000856	ENSONIG00000000856	SYP (3 of 3)	GL831387.1:751171-755622	q1	q2	OK	56.6857	48.7427	-0.217801	-0.816781	0.1608	0.28592	no
ENSONIG00000000857	ENSONIG00000000857	TNIK (2 of 2)	GL831153.1:1787854-1848614	q1	q2	NOTEST	2.66057	2.73184	0.0381406	0	1	1	no
ENSONIG00000000858	ENSONIG00000000858	SYP (2 of 3)	GL831387.1:760212-779573	q1	q2	OK	130.924	126.612	-0.048315	-0.52998	0.35815	0.504232	no
ENSONIG00000000859	ENSONIG00000000859	PRPF39	GL831143.1:3499345-3507281	q1	q2	OK	36.3444	34.3501	-0.0814195	-0.448311	0.4301	0.572102	no
ENSONIG00000000860	ENSONIG00000000860	PLCD3 (1 of 2)	GL831149.1:1247277-1275145	q1	q2	OK	2.82945	5.19635	0.876977	2.44398	5e-05	0.000373456	yes
ENSONIG00000000861	ENSONIG00000000861	-	GL831387.1:785977-819954	q1	q2	NOTEST	0.0152835	0	#NAME?	0	1	1	no
ENSONIG00000000862	ENSONIG00000000862	ZNF238	GL831135.1:4120705-4128739	q1	q2	NOTEST	1.67786	1.3208	-0.345205	0	1	1	no
ENSONIG00000000863	ENSONIG00000000863	AKT3 (1 of 2)	GL831135.1:4191458-4213701	q1	q2	OK	4.92133	4.09843	-0.263977	-0.432659	0.4143	0.557691	no
ENSONIG00000000864	ENSONIG00000000864	-	GL831143.1:3509902-3514881	q1	q2	OK	6.90158	6.66388	-0.0505628	-0.201711	0.72905	0.820021	no
ENSONIG00000000865	ENSONIG00000000865	-	GL831143.1:3520987-3535002	q1	q2	OK	5.83976	6.59111	0.174612	0.699101	0.2235	0.363283	no
ENSONIG00000000866	ENSONIG00000000866	-	GL831143.1:3557360-3558885	q1	q2	NOTEST	0	0	0	0	1	1	no
ENSONIG00000000867	ENSONIG00000000867	SDCCAG8	GL831135.1:4218829-4265974	q1	q2	NOTEST	1.34787	1.77993	0.401141	0	1	1	no
ENSONIG00000000868	ENSONIG00000000868	ARHGAP23 (1 of 2)	GL831149.1:1283847-1309184	q1	q2	OK	2.77812	5.38409	0.954597	2.60148	0.0001	0.000712231	yes
ENSONIG00000000869	ENSONIG00000000869	NAA30	GL831143.1:3574757-3579384	q1	q2	NOTEST	1.30572	1.98646	0.605352	0	1	1	no
ENSONIG00000000870	ENSONIG00000000870	ACTR10	GL831143.1:3593015-3604003	q1	q2	OK	13.3753	16.3432	0.289114	1.23476	0.0338	0.0896534	no
ENSONIG00000000871	ENSONIG00000000871	TNFAIP3	GL831135.1:4272835-4285104	q1	q2	OK	7.04878	9.62699	0.449711	2.01977	0.0006	0.00341175	yes
ENSONIG00000000872	ENSONIG00000000872	SLC2A2	GL831153.1:1849084-1858911	q1	q2	NOTEST	0	0	0	0	1	1	no
ENSONIG00000000873	ENSONIG00000000873	-	GL831312.1:1527638-1544805	q1	q2	NOTEST	0.755509	0.813682	0.107016	0	1	1	no
ENSONIG00000000874	ENSONIG00000000874	-	GL831143.1:3607841-3615565	q1	q2	NOTEST	0.0693928	0	#NAME?	0	1	1	no
ENSONIG00000000875	ENSONIG00000000875	-	GL831143.1:3619212-3627544	q1	q2	NOTEST	2.73412	2.9674	0.118122	0	1	1	no
ENSONIG00000000876	ENSONIG00000000876	ZNF410	GL831143.1:3627919-3641168	q1	q2	OK	9.67259	5.53698	-0.804803	-1.67506	0.0053	0.0206388	yes
ENSONIG00000000877	ENSONIG00000000877	LASP1 (1 of 2)	GL831149.1:1359769-1387290	q1	q2	OK	19.042	24.062	0.337575	0.797385	0.15745	0.281628	no
ENSONIG00000000878	ENSONIG00000000878	ENTPD5 (2 of 2)	GL831143.1:3642051-3647995	q1	q2	OK	3.47038	4.72381	0.444855	0.591167	0.28815	0.43395	no
ENSONIG00000000879	ENSONIG00000000879	-	GL831153.1:1859801-1867945	q1	q2	OK	5.48968	5.42801	-0.0162983	-0.0567793	0.9314	0.959472	no
ENSONIG00000000880	ENSONIG00000000880	PLXDC1 (2 of 2)	GL831149.1:1388506-1399477	q1	q2	NOTEST	3.05327	2.1617	-0.498192	0	1	1	no
ENSONIG00000000881	ENSONIG00000000881	PERP	GL831135.1:4295885-4308001	q1	q2	OK	34.8511	30.5121	-0.191822	-1.31746	0.0237	0.0689405	no
ENSONIG00000000882	ENSONIG00000000882	SLC7A14 (1 of 2)	GL831153.1:1900482-1923745	q1	q2	NOTEST	2.98524	3.71872	0.316958	0	1	1	no
ENSONIG00000000883	ENSONIG00000000883	TMEM26 (2 of 2)	GL831135.1:4313435-4320750	q1	q2	NOTEST	0	0.179958	inf	0	1	1	no
ENSONIG00000000884	ENSONIG00000000884	ALDH6A1 (2 of 2)	GL831143.1:3650352-3659369	q1	q2	NOTEST	3.25496	4.56122	0.486778	0	1	1	no
ENSONIG00000000885	ENSONIG00000000885	-	GL831968.1:19829-21242	q1	q2	NOTEST	0	0	0	0	1	1	no
ENSONIG00000000886	ENSONIG00000000886	TMEM26 (1 of 2)	GL831135.1:4327611-4333778	q1	q2	NOTEST	0	0	0	0	1	1	no
ENSONIG00000000887	ENSONIG00000000887	CLDN11 (1 of 2)	GL831153.1:1930101-1933658	q1	q2	NOTEST	3.16	1.44243	-1.13143	0	1	1	no
ENSONIG00000000888	ENSONIG00000000888	GRIN3B (2 of 2)	GL831153.1:1983895-2045174	q1	q2	NOTEST	0.0426942	0	#NAME?	0	1	1	no
ENSONIG00000000889	ENSONIG00000000889	ARID5B	GL831135.1:4359804-4432415	q1	q2	NOTEST	1.00047	1.31254	0.391679	0	1	1	no
ENSONIG00000000890	ENSONIG00000000890	ARL5C	GL831149.1:1404431-1406449	q1	q2	OK	4.991	4.93657	-0.0158191	-0.0143539	0.92175	0.952182	no
ENSONIG00000000891	ENSONIG00000000891	RTKN2	GL831135.1:4435908-4445484	q1	q2	NOTEST	0	0.0877618	inf	0	1	1	no
ENSONIG00000000892	ENSONIG00000000892	CACNB1	GL831149.1:1411675-1445197	q1	q2	OK	18.5376	24.5564	0.405643	1.73687	0.00305	0.013165	yes
ENSONIG00000000893	ENSONIG00000000893	-	GL831153.1:2051331-2068399	q1	q2	NOTEST	0.0619451	0	#NAME?	0	1	1	no
ENSONIG00000000894	ENSONIG00000000894	LRFN5 (2 of 2)	GL831143.1:3669639-3676636	q1	q2	NOTEST	0.29087	0.304689	0.0669632	0	1	1	no
ENSONIG00000000895	ENSONIG00000000895	CEP170 (1 of 2)	GL831135.1:4448324-4487528	q1	q2	OK	7.14749	9.56861	0.420874	2.37163	0.0001	0.000712231	yes
ENSONIG00000000896	ENSONIG00000000896	-	GL831143.1:3691430-3695555	q1	q2	OK	50.7685	61.4073	0.274477	1.40872	0.01565	0.0494836	yes
ENSONIG00000000897	ENSONIG00000000897	-	GL831153.1:2097098-2103095	q1	q2	NOTEST	1.38191	2.13293	0.62618	0	1	1	no
ENSONIG00000000898	ENSONIG00000000898	EVL (1 of 2)	GL831143.1:3698116-3715110	q1	q2	NOTEST	0.717108	0.143298	-2.32317	0	1	1	no
ENSONIG00000000899	ENSONIG00000000899	PTBP1 (1 of 2)	GL831153.1:2110395-2120595	q1	q2	OK	6.73679	15.0791	1.16242	3.10724	5e-05	0.000373456	yes
ENSONIG00000000900	ENSONIG00000000900	RPL19 (1 of 2)	GL831149.1:1458572-1461650	q1	q2	OK	1479.19	1858.45	0.329288	7.23055	5e-05	0.000373456	yes
ENSONIG00000000901	ENSONIG00000000901	HINT1	GL831135.1:4491570-4493857	q1	q2	OK	27.7526	34.3362	0.307103	0.879574	0.12665	0.240926	no
ENSONIG00000000902	ENSONIG00000000902	-	GL831149.1:1475633-1481576	q1	q2	NOTEST	0	0.484845	inf	0	1	1	no
ENSONIG00000000903	ENSONIG00000000903	DYNC2LI1	GL831135.1:4497696-4517140	q1	q2	NOTEST	0.593208	0.618757	0.0608336	0	1	1	no
ENSONIG00000000904	ENSONIG00000000904	-	GL831143.1:3752312-3755276	q1	q2	NOTEST	0	0.53866	inf	0	1	1	no
ENSONIG00000000905	ENSONIG00000000905	EFNA2 (2 of 2)	GL831153.1:2205083-2211860	q1	q2	NOTEST	0.932028	0	#NAME?	0	1	1	no
ENSONIG00000000906	ENSONIG00000000906	MAPKBP1 (2 of 2)	GL831143.1:3831749-3853285	q1	q2	NOTEST	0	0	0	0	1	1	no
ENSONIG00000000907	ENSONIG00000000907	SNAP23	GL831153.1:2217851-2229509	q1	q2	OK	9.15924	15.0943	0.720703	1.40421	0.01275	0.0420256	yes
ENSONIG00000000908	ENSONIG00000000908	-	GL831387.1:844791-899434	q1	q2	NOTEST	0.0597782	0.151042	1.33726	0	1	1	no
ENSONIG00000000909	ENSONIG00000000909	-	GL831149.1:1544324-1548768	q1	q2	NOTEST	0	0.239237	inf	0	1	1	no
ENSONIG00000000910	ENSONIG00000000910	GJC1 (1 of 3)	GL831149.1:1559175-1560633	q1	q2	NOTEST	0.130779	0	#NAME?	0	1	1	no
ENSONIG00000000911	ENSONIG00000000911	ABCG5	GL831135.1:4497696-4517140	q1	q2	NOTEST	0.0818877	0	#NAME?	0	1	1	no
ENSONIG00000000912	ENSONIG00000000912	EFTUD2	GL831149.1:1607030-1620599	q1	q2	OK	13.5108	8.1056	-0.737124	-2.93121	5e-05	0.000373456	yes
ENSONIG00000000913	ENSONIG00000000913	-	GL831143.1:3854780-3858162	q1	q2	NOTEST	0	0	0	0	1	1	no
ENSONIG00000000914	ENSONIG00000000914	SPTB	GL831153.1:2234500-2270396	q1	q2	NOTEST	0.39228	0.3477	-0.174041	0	1	1	no
ENSONIG00000000915	ENSONIG00000000915	ABCG8	GL831135.1:4517205-4525950	q1	q2	NOTEST	0	0	0	0	1	1	no
ENSONIG00000000916	ENSONIG00000000916	PAK7	GL831143.1:3867006-3935289	q1	q2	NOTEST	0.719679	0.852263	0.243946	0	1	1	no
ENSONIG00000000917	ENSONIG00000000917	LRPPRC	GL831135.1:4526725-4598583	q1	q2	OK	8.16333	7.13743	-0.193754	-0.796731	0.16855	0.295597	no
ENSONIG00000000918	ENSONIG00000000918	LAMP5	GL831143.1:3941379-3945580	q1	q2	NOTEST	1.01908	0.213764	-2.25318	0	1	1	no
ENSONIG00000000919	ENSONIG00000000919	PLCB4	GL831143.1:3954003-3983676	q1	q2	NOTEST	1.69873	2.46543	0.537378	0	1	1	no
ENSONIG00000000920	ENSONIG00000000920	SLC25A29 (1 of 3)	AERX01072772.1:1062-5195	q1	q2	NOTEST	3.08283	0.87966	-1.80924	0	1	1	no
ENSONIG00000000921	ENSONIG00000000921	ZNF652	GL831149.1:1629817-1639437	q1	q2	NOTEST	1.65145	1.57751	-0.0660824	0	1	1	no
ENSONIG00000000922	ENSONIG00000000922	-	GL832571.1:3734-4159	q1	q2	NOTEST	0	0	0	0	1	1	no
ENSONIG00000000923	ENSONIG00000000923	PHB	GL831149.1:1645685-1649195	q1	q2	OK	65.3424	49.5124	-0.400229	-1.70477	0.0036	0.015134	yes
ENSONIG00000000924	ENSONIG00000000924	-	GL831149.1:1653135-1657561	q1	q2	NOTEST	2.41067	1.63449	-0.560592	0	1	1	no
ENSONIG00000000925	ENSONIG00000000925	VAT1 (1 of 2)	GL831149.1:1660107-1691612	q1	q2	OK	19.6889	25.4381	0.369607	1.55824	0.0081	0.0289273	yes
ENSONIG00000000926	ENSONIG00000000926	ZNHIT2	GL831135.1:4600306-4602031	q1	q2	NOTEST	2.38741	0.578163	-2.0459	0	1	1	no
ENSONIG00000000927	ENSONIG00000000927	PPM1B (2 of 2)	GL831135.1:4631071-4634293	q1	q2	OK	8.96294	5.29317	-0.75984	-1.3723	0.0187	0.0568961	no
ENSONIG00000000928	ENSONIG00000000928	SLC3A1	GL831135.1:4643404-4650400	q1	q2	NOTEST	1.0921	1.02378	-0.0931958	0	1	1	no
ENSONIG00000000929	ENSONIG00000000929	SLC19A1	GL831414.1:27276-40882	q1	q2	OK	5.91679	4.83085	-0.292538	-1.0137	0.0782	0.170173	no
ENSONIG00000000930	ENSONIG00000000930	-	GL831153.1:2281911-2292222	q1	q2	NOTEST	0	0	0	0	1	1	no
ENSONIG00000000931	ENSONIG00000000931	CDAN1	GL831153.1:2312912-2326681	q1	q2	NOTEST	0.612437	0.56416	-0.118459	0	1	1	no
ENSONIG00000000932	ENSONIG00000000932	ARPC2	GL831414.1:59855-73040	q1	q2	OK	27.1786	28.4751	0.0672269	0.390552	0.5016	0.637091	no
ENSONIG00000000933	ENSONIG00000000933	PLCB1 (1 of 2)	GL831143.1:4022408-4138224	q1	q2	NOTEST	0.119365	0.186506	0.643842	0	1	1	no
ENSONIG00000000934	ENSONIG00000000934	PREPL	GL831135.1:4650615-4768846	q1	q2	NOTEST	0.998141	0.802903	-0.314018	0	1	1	no
ENSONIG00000000935	ENSONIG00000000935	RND2 (1 of 2)	GL831149.1:1702452-1733615	q1	q2	OK	4.15413	6.37089	0.616947	1.26957	0.03015	0.0825842	no
ENSONIG00000000936	ENSONIG00000000936	MRC2	GL831149.1:1786288-1809902	q1	q2	OK	3.70713	5.76104	0.636028	1.88815	0.00135	0.00670099	yes
ENSONIG00000000937	ENSONIG00000000937	CAMKMT	GL831135.1:4650615-4768846	q1	q2	NOTEST	2.41825	2.56723	0.0862508	0	1	1	no
ENSONIG00000000938	ENSONIG00000000938	-	GL831414.1:73309-82257	q1	q2	NOTEST	0.573371	0.806135	0.491551	0	1	1	no
ENSONIG00000000939	ENSONIG00000000939	SIX3	GL831135.1:4854517-4857141	q1	q2	OK	88.7954	47.1628	-0.912835	-4.28318	5e-05	0.000373456	yes
ENSONIG00000000940	ENSONIG00000000940	TTBK2	GL831153.1:2328573-2349710	q1	q2	NOTEST	3.40008	3.93817	0.211957	0	1	1	no
ENSONIG00000000941	ENSONIG00000000941	SIX2	GL831135.1:4876083-4880480	q1	q2	OK	41.8745	17.4064	-1.26645	-3.82247	5e-05	0.000373456	yes
ENSONIG00000000942	ENSONIG00000000942	-	GL831156.1:21014-22492	q1	q2	NOTEST	0	0	0	0	1	1	no
ENSONIG00000000943	ENSONIG00000000943	-	GL831156.1:42461-43337	q1	q2	NOTEST	0	0	0	0	1	1	no
ENSONIG00000000944	ENSONIG00000000944	-	GL831156.1:55976-59114	q1	q2	NOTEST	0	0	0	0	1	1	no
ENSONIG00000000945	ENSONIG00000000945	SRBD1	GL831135.1:4969569-5023691	q1	q2	NOTEST	0.272822	0.0947654	-1.52553	0	1	1	no
ENSONIG00000000946	ENSONIG00000000946	-	GL831156.1:132062-134800	q1	q2	NOTEST	0	0	0	0	1	1	no
ENSONIG00000000947	ENSONIG00000000947	TMEM62	GL831153.1:2353790-2359191	q1	q2	OK	5.59665	5.5622	-0.00890776	-0.019553	0.96595	0.975254	no
ENSONIG00000000948	ENSONIG00000000948	KRT80	GL831414.1:73309-82257	q1	q2	NOTEST	1.01751	0.796052	-0.354113	0	1	1	no
ENSONIG00000000949	ENSONIG00000000949	PTGR2	GL831153.1:2362762-2368064	q1	q2	NOTEST	1.84189	3.39269	0.881247	0	1	1	no
ENSONIG00000000950	ENSONIG00000000950	-	GL831156.1:144823-176717	q1	q2	NOTEST	0	0	0	0	1	1	no
ENSONIG00000000951	ENSONIG00000000951	CD74 (2 of 2)	GL831135.1:5039642-5043782	q1	q2	OK	64.7207	78.976	0.287186	1.89692	0.00115	0.00587041	yes
ENSONIG00000000952	ENSONIG00000000952	ELMSAN1 (1 of 2)	GL831153.1:2371824-2392161	q1	q2	OK	7.25126	11.2171	0.629395	3.317	5e-05	0.000373456	yes
ENSONIG00000000953	ENSONIG00000000953	-	GL831156.1:144823-176717	q1	q2	NOTEST	0	0	0	0	1	1	no
ENSONIG00000000954	ENSONIG00000000954	-	GL831156.1:144823-176717	q1	q2	NOTEST	0	0	0	0	1	1	no
ENSONIG00000000955	ENSONIG00000000955	CRIP2	GL831153.1:2402051-2451621	q1	q2	OK	5.27959	3.71439	-0.507301	-0.311908	0.51535	0.650288	no
ENSONIG00000000956	ENSONIG00000000956	-	GL831156.1:180701-182964	q1	q2	NOTEST	0	0	0	0	1	1	no
ENSONIG00000000957	ENSONIG00000000957	GPBAR1	GL831414.1:88619-89603	q1	q2	NOTEST	1.61311	1.22294	-0.399498	0	1	1	no
ENSONIG00000000958	ENSONIG00000000958	BMP2	GL831143.1:4168904-4174908	q1	q2	NOTEST	0.378315	0.150575	-1.3291	0	1	1	no
ENSONIG00000000959	ENSONIG00000000959	AAMP	GL831414.1:100341-109051	q1	q2	OK	32.5369	28.5158	-0.190311	-0.8784	0.12605	0.240003	no
ENSONIG00000000960	ENSONIG00000000960	TLK2 (1 of 2)	GL831149.1:1810318-1823708	q1	q2	OK	9.60746	13.5332	0.494279	2.55777	5e-05	0.000373456	yes
ENSONIG00000000961	ENSONIG00000000961	FERMT1	GL831143.1:4198133-4208728	q1	q2	NOTEST	1.25636	1.38416	0.13976	0	1	1	no
ENSONIG00000000962	ENSONIG00000000962	-	GL831156.1:212663-216182	q1	q2	NOTEST	0	0	0	0	1	1	no
ENSONIG00000000963	ENSONIG00000000963	PLD5 (2 of 2)	GL831135.1:5099831-5123701	q1	q2	NOTEST	0	0	0	0	1	1	no
ENSONIG00000000964	ENSONIG00000000964	-	GL831156.1:216665-217746	q1	q2	NOTEST	0	0	0	0	1	1	no
ENSONIG00000000965	ENSONIG00000000965	-	GL831156.1:223770-226364	q1	q2	NOTEST	0	0	0	0	1	1	no
ENSONIG00000000966	ENSONIG00000000966	HDAC4 (1 of 2)	GL831414.1:123054-195983	q1	q2	NOTEST	1.94726	1.83251	-0.0876188	0	1	1	no
ENSONIG00000000967	ENSONIG00000000967	CCDC104	GL831135.1:5127796-5139745	q1	q2	OK	4.9635	5.40463	0.122839	0.216481	0.7023	0.801736	no
ENSONIG00000000968	ENSONIG00000000968	TRMT6	GL831143.1:4211341-4220122	q1	q2	OK	16.4331	14.4069	-0.189847	-0.657281	0.2573	0.39925	no
ENSONIG00000000969	ENSONIG00000000969	MTA1	GL831153.1:2475182-2503653	q1	q2	NOTEST	2.69275	2.80373	0.0582635	0	1	1	no
ENSONIG00000000970	ENSONIG00000000970	-	GL831156.1:228224-230473	q1	q2	NOTEST	0	0	0	0	1	1	no
ENSONIG00000000971	ENSONIG00000000971	-	GL831143.1:4238901-4249429	q1	q2	NOTEST	0	0	0	0	1	1	no
ENSONIG00000000972	ENSONIG00000000972	-	GL831156.1:239901-243549	q1	q2	NOTEST	0	0	0	0	1	1	no
ENSONIG00000000973	ENSONIG00000000973	ZFP36L1	GL831153.1:2610652-2613034	q1	q2	OK	21.1267	22.4031	0.0846326	0.265465	0.64195	0.757311	no
ENSONIG00000000974	ENSONIG00000000974	SMEK2	GL831135.1:5144344-5152961	q1	q2	OK	7.64887	10.142	0.407017	1.28375	0.03155	0.0854028	no
ENSONIG00000000975	ENSONIG00000000975	PLEKHH1	GL831153.1:2680631-2714892	q1	q2	OK	6.54972	9.77921	0.578285	2.32486	0.00015	0.00102427	yes
ENSONIG00000000976	ENSONIG00000000976	-	GL831156.1:256773-260590	q1	q2	NOTEST	0	0	0	0	1	1	no
ENSONIG00000000977	ENSONIG00000000977	METTL2A	GL831149.1:1823803-1827763	q1	q2	OK	13.5195	10.7249	-0.334072	-1.10863	0.0624	0.143696	no
ENSONIG00000000978	ENSONIG00000000978	GPCPD1	GL831143.1:4252181-4266605	q1	q2	OK	14.9405	20.9837	0.490039	2.86109	5e-05	0.000373456	yes
ENSONIG00000000979	ENSONIG00000000979	-	GL831156.1:265405-267212	q1	q2	NOTEST	0	0	0	0	1	1	no
ENSONIG00000000980	ENSONIG00000000980	-	GL831149.1:1832390-1844548	q1	q2	NOTEST	0.607028	0.363608	-0.73938	0	1	1	no
ENSONIG00000000981	ENSONIG00000000981	-	GL831156.1:282243-283859	q1	q2	NOTEST	0	0	0	0	1	1	no
ENSONIG00000000982	ENSONIG00000000982	-	GL831156.1:289316-315308	q1	q2	NOTEST	0.151192	0	#NAME?	0	1	1	no
ENSONIG00000000983	ENSONIG00000000983	PNPT1	GL831135.1:5155719-5163343	q1	q2	NOTEST	0.872588	0.707461	-0.302649	0	1	1	no
ENSONIG00000000984	ENSONIG00000000984	NAPB (1 of 2)	GL831143.1:4269299-4285418	q1	q2	NOTEST	2.33273	2.94339	0.335456	0	1	1	no
ENSONIG00000000985	ENSONIG00000000985	SLC25A21	GL831153.1:2772780-2798980	q1	q2	NOTEST	0.923493	0.789703	-0.225791	0	1	1	no
ENSONIG00000000986	ENSONIG00000000986	-	GL831156.1:289316-315308	q1	q2	NOTEST	0.297909	0	#NAME?	0	1	1	no
ENSONIG00000000987	ENSONIG00000000987	-	GL831156.1:318777-320111	q1	q2	NOTEST	0	0	0	0	1	1	no
ENSONIG00000000988	ENSONIG00000000988	SLIT3	GL831156.1:389216-455558	q1	q2	OK	3.59741	7.20463	1.00197	3.00191	5e-05	0.000373456	yes
ENSONIG00000000989	ENSONIG00000000989	GZF1	GL831143.1:4269299-4285418	q1	q2	OK	6.6293	6.52413	-0.0230705	-0.0932538	0.8678	0.917397	no
ENSONIG00000000990	ENSONIG00000000990	PAX9	GL831153.1:2802772-2811463	q1	q2	NOTEST	0.0822052	0	#NAME?	0	1	1	no
ENSONIG00000000991	ENSONIG00000000991	-	GL831414.1:203069-213249	q1	q2	OK	52.1813	68.8437	0.399792	1.95293	0.00105	0.00541266	yes
ENSONIG00000000992	ENSONIG00000000992	TRIB2	GL831143.1:4328783-4333287	q1	q2	NOTEST	2.04817	3.0624	0.580326	0	1	1	no
ENSONIG00000000993	ENSONIG00000000993	GPM6B (1 of 2)	GL831414.1:273588-281674	q1	q2	NOTEST	0.462752	0.918441	0.988949	0	1	1	no
ENSONIG00000000994	ENSONIG00000000994	NKX2-8	GL831153.1:2824077-2825033	q1	q2	NOTEST	0	0	0	0	1	1	no
ENSONIG00000000995	ENSONIG00000000995	NKX2-1	GL831153.1:2833458-2837641	q1	q2	NOTEST	0.427811	0.139059	-1.62128	0	1	1	no
ENSONIG00000000996	ENSONIG00000000996	KLHL29	GL831143.1:4474749-4597927	q1	q2	NOTEST	1.33588	1.94216	0.539877	0	1	1	no
ENSONIG00000000997	ENSONIG00000000997	MBIP	GL831153.1:2856313-2861649	q1	q2	NOTEST	1.02409	0.33771	-1.60048	0	1	1	no
ENSONIG00000000998	ENSONIG00000000998	TCAP	GL831149.1:1871880-1875212	q1	q2	NOTEST	0.286183	0.268063	-0.0943658	0	1	1	no
ENSONIG00000000999	ENSONIG00000000999	MREG	GL831149.1:1878718-1881652	q1	q2	NOTEST	0.0761999	0.269001	1.81975	0	1	1	no
ENSONIG00000001000	ENSONIG00000001000	ATAD2B	GL831143.1:4598064-4666909	q1	q2	NOTEST	1.63079	1.35624	-0.265949	0	1	1	no
ENSONIG00000001001	ENSONIG00000001001	RPS6KA5	GL831153.1:2905355-2921340	q1	q2	NOTEST	1.03763	1.23309	0.24898	0	1	1	no
ENSONIG00000001002	ENSONIG00000001002	STARD3	GL831149.1:1881827-1893772	q1	q2	OK	6.57684	7.30818	0.152118	0.514399	0.37	0.516292	no
ENSONIG00000001003	ENSONIG00000001003	GEMIN8	GL831414.1:322739-325403	q1	q2	OK	7.60511	7.22602	-0.0737677	-0.195305	0.72825	0.820021	no
ENSONIG00000001004	ENSONIG00000001004	-	GL831414.1:381714-385220	q1	q2	NOTEST	0	0.0691398	inf	0	1	1	no
ENSONIG00000001005	ENSONIG00000001005	CCDC88A (1 of 2)	GL831135.1:5175745-5239065	q1	q2	NOTEST	0.78181	0.548017	-0.512597	0	1	1	no
ENSONIG00000001006	ENSONIG00000001006	-	GL831414.1:477904-481693	q1	q2	OK	11.0814	24.5981	1.15041	4.25241	5e-05	0.000373456	yes
ENSONIG00000001007	ENSONIG00000001007	-	GL831414.1:508379-510183	q1	q2	NOTEST	0	0	0	0	1	1	no
ENSONIG00000001008	ENSONIG00000001008	-	GL831414.1:511363-511941	q1	q2	NOTEST	0	0	0	0	1	1	no
ENSONIG00000001009	ENSONIG00000001009	-	GL831414.1:707022-708842	q1	q2	NOTEST	0	0	0	0	1	1	no
ENSONIG00000001010	ENSONIG00000001010	-	GL831414.1:741009-741692	q1	q2	NOTEST	0	0	0	0	1	1	no
ENSONIG00000001011	ENSONIG00000001011	-	GL831414.1:780402-782575	q1	q2	NOTEST	0	0	0	0	1	1	no
ENSONIG00000001012	ENSONIG00000001012	UBXN2A	GL831143.1:4670364-4676804	q1	q2	NOTEST	2.55598	0.947535	-1.43163	0	1	1	no
ENSONIG00000001013	ENSONIG00000001013	MFSD2B	GL831143.1:4680166-4702284	q1	q2	NOTEST	0	0	0	0	1	1	no
ENSONIG00000001014	ENSONIG00000001014	PPP1R1B (1 of 2)	GL831149.1:1895472-1917616	q1	q2	NOTEST	0.0403816	0.0409096	0.0187396	0	1	1	no
ENSONIG00000001015	ENSONIG00000001015	CDK12	GL831149.1:1963127-1974107	q1	q2	OK	12.7399	9.03472	-0.495803	-2.13435	0.00065	0.00364336	yes
ENSONIG00000001016	ENSONIG00000001016	HADHA (1 of 2)	GL831153.1:2924760-2931688	q1	q2	OK	19.7201	19.4811	-0.0175896	-0.0806785	0.8832	0.926977	no
ENSONIG00000001017	ENSONIG00000001017	C2ORF44	GL831143.1:4680166-4702284	q1	q2	NOTEST	1.43104	0.682424	-1.06833	0	1	1	no
ENSONIG00000001018	ENSONIG00000001018	CAMK2G (2 of 2)	GL831135.1:5246223-5324053	q1	q2	NOTEST	0.383862	0.294686	-0.38141	0	1	1	no
ENSONIG00000001019	ENSONIG00000001019	FBXL20	GL831149.1:1979253-1992011	q1	q2	NOTEST	1.54957	1.89863	0.293094	0	1	1	no
ENSONIG00000001020	ENSONIG00000001020	FKBP1B	GL831143.1:4703514-4713738	q1	q2	OK	6.14586	9.01266	0.552338	0.419198	0.4402	0.580868	no
ENSONIG00000001021	ENSONIG00000001021	MUT	GL831143.1:4715354-4726829	q1	q2	NOTEST	4.09249	2.74929	-0.573921	0	1	1	no
ENSONIG00000001022	ENSONIG00000001022	-	GL831143.1:4732347-4743315	q1	q2	NOTEST	0	0	0	0	1	1	no
ENSONIG00000001023	ENSONIG00000001023	-	GL831135.1:5338546-5341720	q1	q2	NOTEST	0	0	0	0	1	1	no
ENSONIG00000001024	ENSONIG00000001024	-	GL831143.1:4768494-4769512	q1	q2	NOTEST	0	0	0	0	1	1	no
ENSONIG00000001025	ENSONIG00000001025	RUNX2	GL831143.1:4853555-4920895	q1	q2	NOTEST	1.59807	2.38555	0.577992	0	1	1	no
ENSONIG00000001026	ENSONIG00000001026	SYNPO2L (1 of 2)	GL831135.1:5351689-5360857	q1	q2	NOTEST	0	0	0	0	1	1	no
ENSONIG00000001027	ENSONIG00000001027	STAC2 (1 of 2)	GL831149.1:1997911-2025210	q1	q2	NOTEST	0.0354782	0.0733384	1.04764	0	1	1	no
ENSONIG00000001028	ENSONIG00000001028	MYOZ1 (1 of 2)	GL831135.1:5367907-5370624	q1	q2	NOTEST	0	0	0	0	1	1	no
ENSONIG00000001029	ENSONIG00000001029	HHAT	GL831135.1:5372861-5388045	q1	q2	NOTEST	0	0	0	0	1	1	no
ENSONIG00000001030	ENSONIG00000001030	-	GL831149.1:2048450-2052194	q1	q2	NOTEST	0.0557512	0.0607986	0.125033	0	1	1	no
ENSONIG00000001031	ENSONIG00000001031	CLIC5 (1 of 2)	GL831143.1:4926651-4938331	q1	q2	NOTEST	0	0	0	0	1	1	no
ENSONIG00000001032	ENSONIG00000001032	KIF3C (2 of 2)	GL831153.1:2932844-2939004	q1	q2	OK	7.07217	9.4737	0.421776	1.41937	0.01415	0.0457764	yes
ENSONIG00000001033	ENSONIG00000001033	KCNH1 (1 of 2)	GL831135.1:5397244-5445667	q1	q2	NOTEST	0.0501459	0.0681641	0.44288	0	1	1	no
ENSONIG00000001034	ENSONIG00000001034	ADAM11 (2 of 2)	GL831149.1:2055237-2073030	q1	q2	NOTEST	0.0696962	0.202995	1.54229	0	1	1	no
ENSONIG00000001035	ENSONIG00000001035	ENPP5	GL831143.1:4941365-4946235	q1	q2	NOTEST	2.04394	2.05846	0.0102154	0	1	1	no
ENSONIG00000001036	ENSONIG00000001036	ASXL2	GL831153.1:2939139-2952289	q1	q2	NOTEST	0.761541	1.09625	0.525578	0	1	1	no
ENSONIG00000001037	ENSONIG00000001037	PHIP	GL831143.1:4969046-5002687	q1	q2	NOTEST	0.749884	1.22378	0.706602	0	1	1	no
ENSONIG00000001038	ENSONIG00000001038	FGFRL1 (2 of 2)	GL831156.1:676295-741048	q1	q2	NOTEST	2.65409	4.46155	0.749327	0	1	1	no
ENSONIG00000001039	ENSONIG00000001039	-	GL831135.1:5451560-5458978	q1	q2	OK	5.24536	4.51767	-0.215462	-0.399686	0.4918	0.628261	no
ENSONIG00000001040	ENSONIG00000001040	RFFL	GL831203.1:1543-12011	q1	q2	NOTEST	2.40556	2.38553	-0.0120626	0	1	1	no
ENSONIG00000001041	ENSONIG00000001041	DTNB	GL831153.1:2955662-2993288	q1	q2	OK	4.01518	6.10353	0.604177	2.10307	0.0002	0.00131707	yes
ENSONIG00000001042	ENSONIG00000001042	EIF4H	GL831203.1:17077-24192	q1	q2	OK	72.0387	51.6675	-0.479515	-2.04482	0.0007	0.00387186	yes
ENSONIG00000001043	ENSONIG00000001043	-	GL831156.1:759333-761277	q1	q2	NOTEST	0	0	0	0	1	1	no
ENSONIG00000001044	ENSONIG00000001044	SPON2	GL831156.1:762761-770774	q1	q2	NOTEST	0	0	0	0	1	1	no
ENSONIG00000001045	ENSONIG00000001045	ANO7	GL831203.1:26427-39755	q1	q2	NOTEST	2.15937	2.86183	0.406328	0	1	1	no
ENSONIG00000001046	ENSONIG00000001046	CTBP1	GL831156.1:803654-828228	q1	q2	NOTEST	2.31944	3.52985	0.605828	0	1	1	no
ENSONIG00000001047	ENSONIG00000001047	-	GL831203.1:91090-93658	q1	q2	NOTEST	0.236388	0.244951	0.0513378	0	1	1	no
ENSONIG00000001048	ENSONIG00000001048	ECE2	GL831203.1:122928-163089	q1	q2	OK	9.11839	8.40095	-0.118226	-0.561906	0.3109	0.457228	no
ENSONIG00000001049	ENSONIG00000001049	IRAK1BP1	GL831143.1:5011187-5013975	q1	q2	NOTEST	0.910863	1.20476	0.403434	0	1	1	no
ENSONIG00000001050	ENSONIG00000001050	DNMT3A	GL831153.1:2998373-3042127	q1	q2	NOTEST	0.215384	0.412305	0.936802	0	1	1	no
ENSONIG00000001051	ENSONIG00000001051	TBX18	GL831143.1:5076793-5086615	q1	q2	NOTEST	0.418126	0.105923	-1.98092	0	1	1	no
ENSONIG00000001052	ENSONIG00000001052	LEPREL4	GL831149.1:2076288-2081979	q1	q2	NOTEST	0	0.165595	inf	0	1	1	no
ENSONIG00000001053	ENSONIG00000001053	-	GL831143.1:5116287-5130134	q1	q2	NOTEST	0	0	0	0	1	1	no
ENSONIG00000001054	ENSONIG00000001054	MAEA	GL831156.1:831433-847719	q1	q2	OK	8.78568	9.30634	0.0830601	0.360966	0.53315	0.664483	no
ENSONIG00000001055	ENSONIG00000001055	EPT1	GL831143.1:5140271-5147855	q1	q2	NOTEST	0.56571	0.145453	-1.9595	0	1	1	no
ENSONIG00000001056	ENSONIG00000001056	FKBP10 (2 of 2)	GL831149.1:2084331-2102160	q1	q2	NOTEST	2.84571	1.33738	-1.08938	0	1	1	no
ENSONIG00000001057	ENSONIG00000001057	SST	GL831203.1:174359-177711	q1	q2	NOTEST	0	0	0	0	1	1	no
ENSONIG00000001058	ENSONIG00000001058	COL4A3 (2 of 2)	GL831203.1:204192-260460	q1	q2	NOTEST	0.0362465	0.069032	0.929424	0	1	1	no
ENSONIG00000001059	ENSONIG00000001059	KLHL3	GL831156.1:859651-871173	q1	q2	NOTEST	0.577973	0.274277	-1.07537	0	1	1	no
ENSONIG00000001060	ENSONIG00000001060	AGBL5	GL831143.1:5151129-5169571	q1	q2	NOTEST	1.37503	1.05395	-0.383656	0	1	1	no
ENSONIG00000001061	ENSONIG00000001061	NT5C3B (2 of 2)	GL831149.1:2084331-2102160	q1	q2	OK	5.07285	1.41364	-1.84338	-1.74437	0.0295	0.0811573	no
ENSONIG00000001062	ENSONIG00000001062	PAPOLA	GL831143.1:5172346-5181439	q1	q2	NOTEST	0	0	0	0	1	1	no
ENSONIG00000001063	ENSONIG00000001063	DPYSL5 (1 of 2)	GL831153.1:3051037-3071133	q1	q2	NOTEST	0.983705	0.743919	-0.40308	0	1	1	no
ENSONIG00000001064	ENSONIG00000001064	KLHL11	GL831149.1:2105562-2108276	q1	q2	NOTEST	2.17272	0.815617	-1.41354	0	1	1	no
ENSONIG00000001065	ENSONIG00000001065	-	GL831135.1:5461783-5527048	q1	q2	OK	17.1388	11.0435	-0.634066	-2.29213	0.00015	0.00102427	yes
ENSONIG00000001066	ENSONIG00000001066	ACLY (1 of 2)	GL831149.1:2108807-2131026	q1	q2	OK	9.85972	10.3699	0.0727845	0.376046	0.5071	0.642519	no
ENSONIG00000001067	ENSONIG00000001067	BCL11B (2 of 2)	GL831143.1:5309035-5342624	q1	q2	NOTEST	0	0	0	0	1	1	no
ENSONIG00000001068	ENSONIG00000001068	FAM13B	GL831156.1:880835-928207	q1	q2	NOTEST	1.30966	1.19715	-0.129588	0	1	1	no
ENSONIG00000001069	ENSONIG00000001069	CCNK	GL831143.1:5347143-5354103	q1	q2	OK	5.80012	4.31778	-0.425793	-1.19491	0.04195	0.105783	no
ENSONIG00000001070	ENSONIG00000001070	-	GL831135.1:5528411-5534983	q1	q2	NOTEST	2.12678	0.66942	-1.66769	0	1	1	no
ENSONIG00000001071	ENSONIG00000001071	CCDC85C	GL831143.1:5358566-5402078	q1	q2	NOTEST	1.63825	1.84044	0.167887	0	1	1	no
ENSONIG00000001072	ENSONIG00000001072	MAPRE3 (1 of 2)	GL831153.1:3071602-3079928	q1	q2	NOTEST	1.04979	0.719863	-0.544304	0	1	1	no
ENSONIG00000001073	ENSONIG00000001073	CNP	GL831149.1:2132727-2136730	q1	q2	OK	30.1604	23.5614	-0.356233	-1.83702	0.00125	0.00626894	yes
ENSONIG00000001074	ENSONIG00000001074	CYP46A1	GL831143.1:5451069-5456161	q1	q2	NOTEST	2.81496	2.5979	-0.115768	0	1	1	no
ENSONIG00000001075	ENSONIG00000001075	COL4A4 (2 of 2)	GL831203.1:283601-315102	q1	q2	NOTEST	0	0	0	0	1	1	no
ENSONIG00000001076	ENSONIG00000001076	-	GL831149.1:2136951-2144499	q1	q2	NOTEST	3.56562	3.45346	-0.0461133	0	1	1	no
ENSONIG00000001077	ENSONIG00000001077	EIF4E (1 of 2)	GL831156.1:1556343-1562174	q1	q2	NOTEST	2.47016	2.18743	-0.175366	0	1	1	no
ENSONIG00000001078	ENSONIG00000001078	-	GL831156.1:1562563-1568160	q1	q2	OK	23.1814	28.0984	0.277522	1.28565	0.0272	0.0762983	no
ENSONIG00000001079	ENSONIG00000001079	-	GL831153.1:3111619-3116822	q1	q2	NOTEST	0	0.140742	inf	0	1	1	no
ENSONIG00000001080	ENSONIG00000001080	DNAJC7 (2 of 2)	GL831149.1:2144575-2151073	q1	q2	OK	18.2636	16.8756	-0.114031	-0.596612	0.3017	0.447287	no
ENSONIG00000001081	ENSONIG00000001081	NKIRAS2	GL831149.1:2151520-2156191	q1	q2	OK	9.157	8.54216	-0.100274	-0.380218	0.50765	0.643023	no
ENSONIG00000001082	ENSONIG00000001082	ISM2	GL831143.1:5467866-5472122	q1	q2	NOTEST	0.162159	0.266583	0.71718	0	1	1	no
ENSONIG00000001083	ENSONIG00000001083	ZNF385C (1 of 2)	GL831149.1:2159670-2215846	q1	q2	NOTEST	0.721846	0.352043	-1.03594	0	1	1	no
ENSONIG00000001084	ENSONIG00000001084	SPTLC2 (2 of 2)	GL831143.1:5477225-5495861	q1	q2	OK	19.2158	22.4983	0.227525	1.46307	0.0109	0.0370541	yes
ENSONIG00000001085	ENSONIG00000001085	GAR1	GL831156.1:1568972-1574107	q1	q2	OK	6.40543	4.58311	-0.482969	-1.30425	0.02785	0.0776712	no
ENSONIG00000001086	ENSONIG00000001086	-	GL831156.1:1574705-1580173	q1	q2	NOTEST	0	0.245312	inf	0	1	1	no
ENSONIG00000001087	ENSONIG00000001087	EXOC3L2 (2 of 2)	GL831203.1:322729-330187	q1	q2	NOTEST	1.09127	1.69432	0.634701	0	1	1	no
ENSONIG00000001088	ENSONIG00000001088	-	GL831153.1:3233801-3234256	q1	q2	NOTEST	0	0	0	0	1	1	no
ENSONIG00000001089	ENSONIG00000001089	-	GL831153.1:3271110-3272058	q1	q2	NOTEST	0	0	0	0	1	1	no
ENSONIG00000001090	ENSONIG00000001090	DHX58 (2 of 2)	GL831149.1:2316854-2328717	q1	q2	NOTEST	0.412392	0.633616	0.619593	0	1	1	no
ENSONIG00000001091	ENSONIG00000001091	-	GL831153.1:3329276-3330091	q1	q2	NOTEST	0	0	0	0	1	1	no
ENSONIG00000001092	ENSONIG00000001092	-	GL831153.1:3358503-3359194	q1	q2	NOTEST	0	0	0	0	1	1	no
ENSONIG00000001093	ENSONIG00000001093	-	GL831153.1:3417943-3419284	q1	q2	NOTEST	0	0	0	0	1	1	no
ENSONIG00000001094	ENSONIG00000001094	-	GL831153.1:3437383-3451739	q1	q2	NOTEST	0.322777	0	#NAME?	0	1	1	no
ENSONIG00000001095	ENSONIG00000001095	-	GL831153.1:3458964-3461747	q1	q2	NOTEST	1.18947	0.333952	-1.8326	0	1	1	no
ENSONIG00000001096	ENSONIG00000001096	ELAVL1 (1 of 2)	GL831153.1:3469525-3472046	q1	q2	OK	34.078	30.4035	-0.164601	-0.614613	0.28695	0.432972	no
ENSONIG00000001097	ENSONIG00000001097	-	GL831203.1:377780-409156	q1	q2	NOTEST	0	0	0	0	1	1	no
ENSONIG00000001098	ENSONIG00000001098	SNW1	GL831143.1:5506366-5516111	q1	q2	OK	14.4157	14.0334	-0.0387723	-0.188515	0.7374	0.825438	no
ENSONIG00000001099	ENSONIG00000001099	-	GL831153.1:3477338-3485849	q1	q2	NOTEST	0	0.761671	inf	0	1	1	no
ENSONIG00000001100	ENSONIG00000001100	SUPT5H	GL831203.1:377780-409156	q1	q2	OK	45.1091	85.9178	0.92954	8.72392	5e-05	0.000373456	yes
ENSONIG00000001101	ENSONIG00000001101	DHX58 (1 of 2)	GL831149.1:2316854-2328717	q1	q2	NOTEST	2.68312	1.62054	-0.727438	0	1	1	no
ENSONIG00000001102	ENSONIG00000001102	KAT2A	GL831149.1:2333444-2345017	q1	q2	NOTEST	0.90652	0.579477	-0.645587	0	1	1	no
ENSONIG00000001103	ENSONIG00000001103	PPPDE1	GL831135.1:5541813-5552521	q1	q2	NOTEST	1.89918	0.624761	-1.604	0	1	1	no
ENSONIG00000001104	ENSONIG00000001104	MTRF1L	GL831135.1:5570164-5576199	q1	q2	NOTEST	0.476453	0.38132	-0.321331	0	1	1	no
ENSONIG00000001105	ENSONIG00000001105	PITX2	GL831156.1:1739085-1751208	q1	q2	NOTEST	0	0	0	0	1	1	no
ENSONIG00000001106	ENSONIG00000001106	NRXN3	GL831143.1:5694122-5994785	q1	q2	NOTEST	3.64878	3.87558	0.0869965	0	1	1	no
ENSONIG00000001107	ENSONIG00000001107	-	GL831153.1:3489052-3490912	q1	q2	NOTEST	0	0	0	0	1	1	no
ENSONIG00000001108	ENSONIG00000001108	-	GL831153.1:3493058-3499926	q1	q2	NOTEST	3.11765	3.1352	0.00809831	0	1	1	no
ENSONIG00000001109	ENSONIG00000001109	ELOVL6	GL831156.1:1770796-1789327	q1	q2	OK	10.4276	8.01932	-0.378858	-0.645924	0.2857	0.431397	no
ENSONIG00000001110	ENSONIG00000001110	FBXO5	GL831135.1:5579829-5582209	q1	q2	NOTEST	0.211969	0	#NAME?	0	1	1	no
ENSONIG00000001111	ENSONIG00000001111	VIP	GL831135.1:5596587-5602730	q1	q2	NOTEST	0	0.125499	inf	0	1	1	no
ENSONIG00000001112	ENSONIG00000001112	EGF	GL831156.1:1796933-1817668	q1	q2	NOTEST	0	0	0	0	1	1	no
ENSONIG00000001113	ENSONIG00000001113	RAB5C (1 of 2)	GL831149.1:2346604-2352652	q1	q2	OK	22.9602	27.0966	0.238977	1.40445	0.01545	0.0489496	yes
ENSONIG00000001114	ENSONIG00000001114	DIRAS1 (1 of 2)	GL831153.1:3512267-3513178	q1	q2	NOTEST	2.11264	3.22298	0.60935	0	1	1	no
ENSONIG00000001115	ENSONIG00000001115	ANAPC1	GL831135.1:5625046-5680180	q1	q2	NOTEST	0.206347	0.0243023	-3.08591	0	1	1	no
ENSONIG00000001116	ENSONIG00000001116	GADD45B (2 of 3)	GL831153.1:3531475-3533937	q1	q2	OK	46.8657	40.6948	-0.203688	-0.575158	0.3083	0.455034	no
ENSONIG00000001117	ENSONIG00000001117	KCNH4 (2 of 2)	GL831149.1:2359459-2371686	q1	q2	NOTEST	0	0	0	0	1	1	no
ENSONIG00000001118	ENSONIG00000001118	-	GL831203.1:414946-423194	q1	q2	NOTEST	0.168769	0.139778	-0.271919	0	1	1	no
ENSONIG00000001119	ENSONIG00000001119	GPR171	GL831203.1:543906-549836	q1	q2	NOTEST	2.23836	2.57616	0.202778	0	1	1	no
ENSONIG00000001120	ENSONIG00000001120	-	GL831153.1:3534381-3538598	q1	q2	NOTEST	0	0.115	inf	0	1	1	no
ENSONIG00000001121	ENSONIG00000001121	-	GL831203.1:558805-569218	q1	q2	NOTEST	0	0	0	0	1	1	no
ENSONIG00000001122	ENSONIG00000001122	P2RY14	GL831203.1:584029-585043	q1	q2	NOTEST	0	0	0	0	1	1	no
ENSONIG00000001123	ENSONIG00000001123	SHKBP1	GL831203.1:605925-614342	q1	q2	NOTEST	4.02526	4.30457	0.0967858	0	1	1	no
ENSONIG00000001124	ENSONIG00000001124	LRIT3	GL831156.1:1824000-1830651	q1	q2	NOTEST	0	0.0476239	inf	0	1	1	no
ENSONIG00000001125	ENSONIG00000001125	MAP1S (2 of 2)	GL831153.1:3538807-3551561	q1	q2	NOTEST	2.05857	1.7186	-0.260409	0	1	1	no
ENSONIG00000001126	ENSONIG00000001126	SLC16A12 (1 of 2)	GL831135.1:5859894-5873554	q1	q2	NOTEST	0.0832894	0.0565984	-0.557372	0	1	1	no
ENSONIG00000001127	ENSONIG00000001127	GPM6A (1 of 2)	GL831156.1:1835455-1841307	q1	q2	OK	4.71553	3.74738	-0.331537	-0.338216	0.55105	0.679715	no
ENSONIG00000001128	ENSONIG00000001128	HCRT	GL831149.1:2373323-2375009	q1	q2	NOTEST	0	0	0	0	1	1	no
ENSONIG00000001129	ENSONIG00000001129	-	GL831149.1:2377479-2441680	q1	q2	NOTEST	0.243596	0.205445	-0.245734	0	1	1	no
ENSONIG00000001130	ENSONIG00000001130	-	GL831153.1:3551620-3553093	q1	q2	OK	12.1905	10.8643	-0.166162	-0.373245	0.51535	0.650288	no
ENSONIG00000001131	ENSONIG00000001131	STAT5B	GL831149.1:2451929-2500927	q1	q2	NOTEST	0.661617	0.353576	-0.903974	0	1	1	no
ENSONIG00000001132	ENSONIG00000001132	CCDC94	GL831153.1:3554569-3558522	q1	q2	OK	10.9092	8.54337	-0.352669	-0.727986	0.22735	0.368222	no
ENSONIG00000001133	ENSONIG00000001133	CEP128	GL831143.1:6011238-6065760	q1	q2	NOTEST	0.619761	0.743112	0.261869	0	1	1	no
ENSONIG00000001134	ENSONIG00000001134	-	GL831203.1:617238-621517	q1	q2	NOTEST	0	0	0	0	1	1	no
ENSONIG00000001135	ENSONIG00000001135	SHD (2 of 2)	GL831153.1:3561602-3568187	q1	q2	NOTEST	1.08968	0.330079	-1.72302	0	1	1	no
ENSONIG00000001136	ENSONIG00000001136	SPATA4	GL831156.1:1863899-1867833	q1	q2	NOTEST	0.225222	0	#NAME?	0	1	1	no
ENSONIG00000001137	ENSONIG00000001137	PANK1	GL831135.1:5882439-5902479	q1	q2	NOTEST	0.293436	0.422287	0.525181	0	1	1	no
ENSONIG00000001138	ENSONIG00000001138	PPAP2C (2 of 2)	GL831153.1:3606781-3610510	q1	q2	NOTEST	1.07168	0.998269	-0.102377	0	1	1	no
ENSONIG00000001139	ENSONIG00000001139	LTBP4	GL831203.1:624565-686508	q1	q2	NOTEST	0.0895284	0	#NAME?	0	1	1	no
ENSONIG00000001140	ENSONIG00000001140	ASB5	GL831156.1:1868933-1875204	q1	q2	NOTEST	0	0.178272	inf	0	1	1	no
ENSONIG00000001141	ENSONIG00000001141	-	GL831153.1:3613421-3622912	q1	q2	OK	11.1945	8.78886	-0.349041	-1.67628	0.0033	0.0140608	yes
ENSONIG00000001142	ENSONIG00000001142	-	GL831135.1:5906141-5908925	q1	q2	OK	5.29475	2.48599	-1.09074	-0.958325	0.09745	0.200873	no
ENSONIG00000001143	ENSONIG00000001143	TSHR (1 of 2)	GL831143.1:6066322-6111349	q1	q2	NOTEST	0.853532	0.515818	-0.726581	0	1	1	no
ENSONIG00000001144	ENSONIG00000001144	MAL (1 of 3)	GL831135.1:5929054-5935026	q1	q2	NOTEST	0	0.490266	inf	0	1	1	no
ENSONIG00000001145	ENSONIG00000001145	MAL (3 of 3)	GL831135.1:5938092-5945363	q1	q2	NOTEST	0.29601	0.0929375	-1.67131	0	1	1	no
ENSONIG00000001146	ENSONIG00000001146	CTSO	GL831156.1:1875940-1885524	q1	q2	NOTEST	1.93134	1.2514	-0.626064	0	1	1	no
ENSONIG00000001147	ENSONIG00000001147	GNA11 (2 of 2)	GL831153.1:3630418-3648913	q1	q2	NOTEST	1.08395	0.731025	-0.568306	0	1	1	no
ENSONIG00000001148	ENSONIG00000001148	STAT3	GL831149.1:2508097-2520818	q1	q2	OK	91.3037	97.5781	0.0958833	1.29109	0.0206	0.0615456	no
ENSONIG00000001149	ENSONIG00000001149	TDO2	GL831156.1:1886839-1891011	q1	q2	NOTEST	0	0.141663	inf	0	1	1	no
ENSONIG00000001150	ENSONIG00000001150	MRPS5	GL831135.1:5953609-5992118	q1	q2	OK	6.19693	7.38395	0.252839	0.526288	0.3642	0.510351	no
ENSONIG00000001151	ENSONIG00000001151	-	GL831156.1:1894216-2019245	q1	q2	NOTEST	0.0119144	0.0512785	2.10565	0	1	1	no
ENSONIG00000001152	ENSONIG00000001152	-	GL831153.1:3651064-3654475	q1	q2	NOTEST	4.06501	1.21831	-1.73837	0	1	1	no
ENSONIG00000001153	ENSONIG00000001153	SLC8A1 (1 of 2)	GL831135.1:6171788-6287281	q1	q2	NOTEST	0.099658	0	#NAME?	0	1	1	no
ENSONIG00000001154	ENSONIG00000001154	TPGS1	GL831153.1:3655325-3658538	q1	q2	NOTEST	1.12003	1.38389	0.305196	0	1	1	no
ENSONIG00000001155	ENSONIG00000001155	ISYNA1	GL831153.1:3660586-3666146	q1	q2	OK	781.78	1149.16	0.55575	18.6992	5e-05	0.000373456	yes
ENSONIG00000001156	ENSONIG00000001156	GTF2A1	GL831143.1:6066322-6111349	q1	q2	OK	6.56222	5.59421	-0.23025	-0.395452	0.4976	0.633675	no
ENSONIG00000001157	ENSONIG00000001157	PDCD10 (1 of 2)	GL831153.1:3678798-3691779	q1	q2	OK	10.3505	14.8784	0.523525	0.884848	0.14285	0.262149	no
ENSONIG00000001158	ENSONIG00000001158	FOXN3	GL831143.1:6120787-6180431	q1	q2	NOTEST	1.58764	1.60182	0.0128232	0	1	1	no
ENSONIG00000001159	ENSONIG00000001159	ILKAP	GL831203.1:687886-691661	q1	q2	NOTEST	1.6617	0	#NAME?	0	1	1	no
ENSONIG00000001160	ENSONIG00000001160	-	GL831153.1:3806261-3808744	q1	q2	NOTEST	0.943951	0.656449	-0.524028	0	1	1	no
ENSONIG00000001161	ENSONIG00000001161	KCNK13	GL831143.1:6285502-6296174	q1	q2	NOTEST	0	0	0	0	1	1	no
ENSONIG00000001162	ENSONIG00000001162	SLITRK3 (2 of 2)	GL831153.1:3895258-3911308	q1	q2	NOTEST	0.266415	0	#NAME?	0	1	1	no
ENSONIG00000001163	ENSONIG00000001163	PSMC1	GL831143.1:6304967-6314249	q1	q2	OK	37.5267	38.1344	0.0231744	0.137395	0.80615	0.875022	no
ENSONIG00000001164	ENSONIG00000001164	-	GL831203.1:695084-705972	q1	q2	NOTEST	4.52444	2.46516	-0.876057	0	1	1	no
ENSONIG00000001165	ENSONIG00000001165	THUMPD2	GL831135.1:6321439-6328134	q1	q2	NOTEST	1.03524	0.881112	-0.232573	0	1	1	no
ENSONIG00000001166	ENSONIG00000001166	MAP4K3	GL831135.1:6329441-6370095	q1	q2	NOTEST	1.94849	1.81401	-0.103177	0	1	1	no
ENSONIG00000001167	ENSONIG00000001167	NRD1 (2 of 2)	GL831153.1:3915325-3941240	q1	q2	NOTEST	3.33859	2.19587	-0.604444	0	1	1	no
ENSONIG00000001168	ENSONIG00000001168	CALM3	GL831143.1:6322884-6329440	q1	q2	OK	308.713	390.027	0.337309	2.44324	5e-05	0.000373456	yes
ENSONIG00000001169	ENSONIG00000001169	BRMS1L	GL831143.1:6359908-6368591	q1	q2	OK	12.9521	11.5287	-0.167961	-0.658203	0.25545	0.3972	no
ENSONIG00000001170	ENSONIG00000001170	WDR74	GL831203.1:708649-732994	q1	q2	OK	8.52143	9.46483	0.151482	0.387405	0.50005	0.635701	no
ENSONIG00000001171	ENSONIG00000001171	IWS1	GL831203.1:708649-732994	q1	q2	OK	22.4554	22.5687	0.00726205	0.0469884	0.93475	0.961191	no
ENSONIG00000001172	ENSONIG00000001172	PSMA6 (2 of 2)	GL831143.1:6384621-6394900	q1	q2	OK	12.8285	14.27	0.153628	0.721661	0.2006	0.335346	no
ENSONIG00000001173	ENSONIG00000001173	AGA	GL831156.1:2069636-2091234	q1	q2	NOTEST	1.49876	0.905119	-0.727595	0	1	1	no
ENSONIG00000001174	ENSONIG00000001174	GMNC	GL831203.1:756791-763321	q1	q2	NOTEST	0	0	0	0	1	1	no
ENSONIG00000001175	ENSONIG00000001175	IL1RAP	GL831203.1:774901-797717	q1	q2	OK	5.11639	5.81105	0.183672	0.361622	0.5181	0.651797	no
ENSONIG00000001176	ENSONIG00000001176	NEIL3	GL831156.1:2069636-2091234	q1	q2	NOTEST	0.718526	0.226509	-1.66547	0	1	1	no
ENSONIG00000001177	ENSONIG00000001177	PTRF (2 of 2)	GL831149.1:2521159-2537881	q1	q2	NOTEST	2.732	1.74904	-0.643397	0	1	1	no
ENSONIG00000001178	ENSONIG00000001178	NFKBIA (1 of 2)	GL831143.1:6384621-6394900	q1	q2	OK	34.4652	39.1551	0.18406	0.533065	0.3556	0.501765	no
ENSONIG00000001179	ENSONIG00000001179	ATP6V0A1 (2 of 2)	GL831149.1:2540829-2555288	q1	q2	OK	5.99141	6.32907	0.0790965	0.252834	0.661	0.771365	no
ENSONIG00000001180	ENSONIG00000001180	ARHGEF33	GL831135.1:6375607-6394345	q1	q2	NOTEST	0	0	0	0	1	1	no
ENSONIG00000001181	ENSONIG00000001181	SLC17A5	GL831135.1:6405874-6412479	q1	q2	OK	13.9777	12.3755	-0.175634	-0.548783	0.337	0.484466	no
ENSONIG00000001182	ENSONIG00000001182	PDGFC	GL831156.1:2122504-2169082	q1	q2	NOTEST	0.477009	0.621452	0.381626	0	1	1	no
ENSONIG00000001183	ENSONIG00000001183	FAM177A1 (2 of 2)	GL831143.1:6417716-6420667	q1	q2	NOTEST	1.23701	2.52766	1.03095	0	1	1	no
ENSONIG00000001184	ENSONIG00000001184	GLRB (1 of 2)	GL831156.1:2179311-2203904	q1	q2	OK	12.8385	13.7498	0.098931	0.374016	0.513	0.648233	no
ENSONIG00000001185	ENSONIG00000001185	-	GL831143.1:7091544-7096649	q1	q2	NOTEST	0	0	0	0	1	1	no
ENSONIG00000001186	ENSONIG00000001186	-	GL831143.1:7108880-7113506	q1	q2	NOTEST	0	0	0	0	1	1	no
ENSONIG00000001187	ENSONIG00000001187	EEF1A1 (2 of 2)	GL831135.1:6416565-6419357	q1	q2	OK	75.0131	64.5852	-0.215938	-1.40599	0.0149	0.0476876	yes
ENSONIG00000001188	ENSONIG00000001188	FGF12 (2 of 2)	GL831203.1:811406-824841	q1	q2	NOTEST	0	0	0	0	1	1	no
ENSONIG00000001189	ENSONIG00000001189	-	GL831149.1:2566027-2576292	q1	q2	NOTEST	0.840601	1.53873	0.872251	0	1	1	no
ENSONIG00000001190	ENSONIG00000001190	-	GL831143.1:7114733-7116864	q1	q2	NOTEST	0	0	0	0	1	1	no
ENSONIG00000001191	ENSONIG00000001191	FAM163A (2 of 2)	GL831153.1:3960196-3965352	q1	q2	NOTEST	0.120902	0.0816561	-0.566209	0	1	1	no
ENSONIG00000001192	ENSONIG00000001192	-	GL831153.1:3968253-3978197	q1	q2	NOTEST	0	0	0	0	1	1	no
ENSONIG00000001193	ENSONIG00000001193	GRIA2 (1 of 2)	GL831156.1:2213621-2259803	q1	q2	NOTEST	0.212011	0.724773	1.77339	0	1	1	no
ENSONIG00000001194	ENSONIG00000001194	HSD17B1P1	GL831149.1:2597294-2601271	q1	q2	NOTEST	0.0914803	0.605898	2.72754	0	1	1	no
ENSONIG00000001195	ENSONIG00000001195	DDX43	GL831135.1:6429581-6445478	q1	q2	NOTEST	0.215691	0.232323	0.107167	0	1	1	no
ENSONIG00000001196	ENSONIG00000001196	ODF3L2 (2 of 2)	GL831153.1:3968253-3978197	q1	q2	NOTEST	0.0712919	0.0484848	-0.556205	0	1	1	no
ENSONIG00000001197	ENSONIG00000001197	MB21D2	GL831203.1:868680-874548	q1	q2	NOTEST	4.18517	1.92658	-1.11925	0	1	1	no
ENSONIG00000001198	ENSONIG00000001198	EBI3	GL831153.1:3968253-3978197	q1	q2	NOTEST	0.284258	0.310381	0.12684	0	1	1	no
ENSONIG00000001199	ENSONIG00000001199	GLRX5	GL831143.1:7139925-7141491	q1	q2	OK	23.2512	19.0287	-0.289127	-0.508738	0.37325	0.518825	no
ENSONIG00000001200	ENSONIG00000001200	-	GL831149.1:2601754-2606310	q1	q2	NOTEST	0.149829	0.0524474	-1.51437	0	1	1	no
ENSONIG00000001201	ENSONIG00000001201	-	GL831203.1:875690-880502	q1	q2	NOTEST	4.65785	4.36926	-0.0922753	0	1	1	no
ENSONIG00000001202	ENSONIG00000001202	INTS9	GL831143.1:7144491-7150627	q1	q2	NOTEST	3.26754	0.672532	-2.28053	0	1	1	no
ENSONIG00000001203	ENSONIG00000001203	-	GL831149.1:2613483-2627225	q1	q2	NOTEST	0.239704	0.567053	1.24223	0	1	1	no
ENSONIG00000001204	ENSONIG00000001204	CRLF1 (1 of 2)	GL831153.1:3981204-4001583	q1	q2	NOTEST	2.95105	4.27011	0.533041	0	1	1	no
ENSONIG00000001205	ENSONIG00000001205	-	GL831153.1:4022200-4036307	q1	q2	NOTEST	0.24092	0.453011	0.91099	0	1	1	no
ENSONIG00000001206	ENSONIG00000001206	CCDC43	GL831149.1:2650305-2654784	q1	q2	OK	5.11926	3.97418	-0.36528	-0.881002	0.1333	0.250246	no
ENSONIG00000001207	ENSONIG00000001207	CHP2	GL831203.1:885635-894830	q1	q2	NOTEST	0.0881037	0.36191	2.03836	0	1	1	no
ENSONIG00000001208	ENSONIG00000001208	DLL3 (1 of 2)	GL831203.1:981603-998144	q1	q2	NOTEST	3.39237	2.46559	-0.460358	0	1	1	no
ENSONIG00000001209	ENSONIG00000001209	KCNQ5 (2 of 2)	GL831135.1:6448539-6476497	q1	q2	NOTEST	0.129058	0.205571	0.671616	0	1	1	no
ENSONIG00000001210	ENSONIG00000001210	C1QL1 (1 of 2)	GL831149.1:2734112-2753041	q1	q2	NOTEST	0	0	0	0	1	1	no
ENSONIG00000001211	ENSONIG00000001211	EZH1	GL831149.1:2819450-2830588	q1	q2	OK	10.5659	10.3329	-0.0321679	-0.100138	0.86045	0.911926	no
ENSONIG00000001212	ENSONIG00000001212	PLA2G7	GL831143.1:7151932-7157899	q1	q2	NOTEST	4.25598	2.41142	-0.819612	0	1	1	no
ENSONIG00000001213	ENSONIG00000001213	CNRIP1 (2 of 2)	GL831135.1:6561339-6576861	q1	q2	NOTEST	0	0.572495	inf	0	1	1	no
ENSONIG00000001214	ENSONIG00000001214	PPP3R2 (2 of 2)	GL831135.1:6605775-6631781	q1	q2	OK	6.67929	5.60353	-0.25336	-0.583114	0.29975	0.445341	no
ENSONIG00000001215	ENSONIG00000001215	OLA.14269	GL831153.1:4058730-4093010	q1	q2	NOTEST	0	0.141569	inf	0	1	1	no
ENSONIG00000001216	ENSONIG00000001216	TIMM50	GL831203.1:1010555-1048174	q1	q2	OK	13.0413	15.4445	0.244002	0.468428	0.4074	0.550592	no
ENSONIG00000001217	ENSONIG00000001217	-	GL831156.1:2292596-2296055	q1	q2	NOTEST	0	0	0	0	1	1	no
ENSONIG00000001218	ENSONIG00000001218	TDRD6	GL831143.1:7172841-7177788	q1	q2	NOTEST	0.0599214	0	#NAME?	0	1	1	no
ENSONIG00000001219	ENSONIG00000001219	-	GL831143.1:7196201-7201258	q1	q2	OK	14.344	13.4561	-0.0921878	-0.356394	0.5402	0.671274	no
ENSONIG00000001220	ENSONIG00000001220	-	GL831203.1:1087000-1089239	q1	q2	NOTEST	0.120982	0	#NAME?	0	1	1	no
ENSONIG00000001221	ENSONIG00000001221	CLIP3	GL831203.1:1099262-1114073	q1	q2	OK	30.4795	52.6163	0.787669	4.27371	5e-05	0.000373456	yes
ENSONIG00000001222	ENSONIG00000001222	FAM198B	GL831156.1:2360804-2369403	q1	q2	NOTEST	0.572899	1.31596	1.19976	0	1	1	no
ENSONIG00000001223	ENSONIG00000001223	PNO1	GL831135.1:6605775-6631781	q1	q2	OK	261.407	319.409	0.289108	2.85184	5e-05	0.000373456	yes
ENSONIG00000001224	ENSONIG00000001224	TMEM144	GL831156.1:2369913-2379909	q1	q2	NOTEST	0	0	0	0	1	1	no
ENSONIG00000001225	ENSONIG00000001225	VSNL1 (1 of 2)	GL831143.1:7205479-7248564	q1	q2	NOTEST	0.940541	0.315096	-1.5777	0	1	1	no
ENSONIG00000001226	ENSONIG00000001226	ELL (2 of 2)	GL831153.1:4106619-4115756	q1	q2	OK	11.4895	16.9797	0.563498	2.06948	0.00035	0.00213497	yes
ENSONIG00000001227	ENSONIG00000001227	CNTNAP1	GL831149.1:2835146-2847315	q1	q2	NOTEST	0	0.0395577	inf	0	1	1	no
ENSONIG00000001228	ENSONIG00000001228	FAM49A	GL831143.1:7408184-7414461	q1	q2	NOTEST	0.775557	3.16323	2.02809	0	1	1	no
ENSONIG00000001229	ENSONIG00000001229	-	GL831203.1:1249158-1249998	q1	q2	OK	5.0837	3.0484	-0.737828	-0.640429	0.28565	0.431397	no
ENSONIG00000001230	ENSONIG00000001230	FBXO16	GL831143.1:7417114-7422409	q1	q2	NOTEST	0.926619	0.516505	-0.843195	0	1	1	no
ENSONIG00000001231	ENSONIG00000001231	TMEM87A	GL831203.1:1265094-1290384	q1	q2	OK	8.75469	8.34288	-0.0695116	-0.23472	0.678	0.784678	no
ENSONIG00000001232	ENSONIG00000001232	D2HGDH	GL831153.1:4117841-4120280	q1	q2	NOTEST	2.76644	1.9034	-0.53945	0	1	1	no
ENSONIG00000001233	ENSONIG00000001233	C1D	GL831135.1:6646281-6648163	q1	q2	OK	2.03134	5.7576	1.50304	0.87085	0.1133	0.221907	no
ENSONIG00000001234	ENSONIG00000001234	-	GL831143.1:7426179-7442522	q1	q2	OK	11.3538	17.2347	0.602143	2.17687	0.00015	0.00102427	yes
ENSONIG00000001235	ENSONIG00000001235	-	GL831153.1:4120404-4130416	q1	q2	OK	9.12816	6.22782	-0.551597	-1.65354	0.00375	0.0156287	yes
ENSONIG00000001236	ENSONIG00000001236	MEIS1	GL831135.1:6871007-6941142	q1	q2	OK	5.08562	4.37159	-0.218266	-0.338598	0.5736	0.700582	no
ENSONIG00000001237	ENSONIG00000001237	RXFP1	GL831156.1:2496381-2513309	q1	q2	NOTEST	0.100809	0	#NAME?	0	1	1	no
ENSONIG00000001238	ENSONIG00000001238	CDC42BPA	GL831143.1:7446216-7509362	q1	q2	NOTEST	2.30221	1.66036	-0.471524	0	1	1	no
ENSONIG00000001239	ENSONIG00000001239	-	GL831203.1:1292581-1302531	q1	q2	OK	36.9263	40.4197	0.130409	0.470114	0.40805	0.551047	no
ENSONIG00000001240	ENSONIG00000001240	-	GL831153.1:4133757-4140984	q1	q2	NOTEST	0.0490224	0	#NAME?	0	1	1	no
ENSONIG00000001241	ENSONIG00000001241	HS6ST1	GL831153.1:4272856-4327460	q1	q2	NOTEST	0.676097	0.672946	-0.00674068	0	1	1	no
ENSONIG00000001242	ENSONIG00000001242	UGGT1	GL831153.1:4339270-4370028	q1	q2	OK	8.3201	5.36026	-0.634297	-2.56918	0.00015	0.00102427	yes
ENSONIG00000001243	ENSONIG00000001243	SPRED2 (2 of 2)	GL831135.1:7123877-7133876	q1	q2	NOTEST	0	0.43916	inf	0	1	1	no
ENSONIG00000001244	ENSONIG00000001244	PLEKHH3	GL831149.1:2880872-2896794	q1	q2	OK	4.4835	4.73255	0.0779924	0.171056	0.75855	0.841659	no
ENSONIG00000001245	ENSONIG00000001245	ACTR2	GL831135.1:7140215-7154755	q1	q2	OK	27.1827	20.8156	-0.385023	-2.20873	0.0003	0.00186802	yes
ENSONIG00000001246	ENSONIG00000001246	TUBG2	GL831149.1:2898832-2906852	q1	q2	OK	7.58432	3.72366	-1.0263	-2.38049	0.0003	0.00186802	yes
ENSONIG00000001247	ENSONIG00000001247	ETFDH	GL831156.1:2521504-2542530	q1	q2	OK	19.3427	16.0457	-0.269601	-1.16592	0.0459	0.11338	no
ENSONIG00000001248	ENSONIG00000001248	LGALSL	GL831135.1:7187247-7191465	q1	q2	NOTEST	0	0.405051	inf	0	1	1	no
ENSONIG00000001249	ENSONIG00000001249	-	GL831203.1:1307626-1317245	q1	q2	OK	21.0893	19.7795	-0.0925085	-0.199559	0.7289	0.820021	no
ENSONIG00000001250	ENSONIG00000001250	PELI1 (1 of 2)	GL831135.1:7247602-7300602	q1	q2	NOTEST	3.41146	2.15777	-0.660848	0	1	1	no
ENSONIG00000001251	ENSONIG00000001251	FAM134C	GL831149.1:2907457-2916084	q1	q2	OK	8.40286	8.76046	0.0601259	0.246501	0.67145	0.779824	no
ENSONIG00000001252	ENSONIG00000001252	NAIF1 (3 of 3)	GL831203.1:1322875-1329508	q1	q2	OK	5.94146	8.37233	0.494812	0.705774	0.13705	0.254851	no
ENSONIG00000001253	ENSONIG00000001253	LEFTY2	GL831143.1:7519047-7520878	q1	q2	NOTEST	0.465545	0.366183	-0.346357	0	1	1	no
ENSONIG00000001254	ENSONIG00000001254	UGP2 (1 of 2)	GL831135.1:7304177-7338493	q1	q2	OK	11.936	12.9212	0.114429	0.32039	0.5642	0.692072	no
ENSONIG00000001255	ENSONIG00000001255	PPID	GL831156.1:2543312-2549779	q1	q2	OK	15.9795	19.6935	0.301491	1.02902	0.07615	0.166519	no
ENSONIG00000001256	ENSONIG00000001256	LRFN3	GL831203.1:2210347-2256302	q1	q2	NOTEST	0.0786746	0	#NAME?	0	1	1	no
ENSONIG00000001257	ENSONIG00000001257	PSMC3IP	GL831149.1:2916233-2927393	q1	q2	NOTEST	1.93964	0.943197	-1.04016	0	1	1	no
ENSONIG00000001258	ENSONIG00000001258	-	GL831203.1:2289296-2292931	q1	q2	OK	7.70749	11.1867	0.537445	1.21557	0.0377	0.097852	no
ENSONIG00000001259	ENSONIG00000001259	-	GL831203.1:2320991-2327277	q1	q2	NOTEST	0.630695	0.26021	-1.27727	0	1	1	no
ENSONIG00000001260	ENSONIG00000001260	HNRNPU	GL831143.1:7524348-7534604	q1	q2	OK	74.7289	80.1056	0.100238	1.3712	0.01685	0.0525382	no
ENSONIG00000001261	ENSONIG00000001261	-	GL831203.1:2349359-2443582	q1	q2	NOTEST	0	0.201397	inf	0	1	1	no
ENSONIG00000001262	ENSONIG00000001262	SP3 (2 of 2)	GL831153.1:4371562-4377569	q1	q2	OK	5.99236	5.37983	-0.155564	-0.361391	0.52695	0.659763	no
ENSONIG00000001263	ENSONIG00000001263	RPS3	GL831203.1:2453754-2460189	q1	q2	OK	768.563	938.457	0.288127	6.18883	5e-05	0.000373456	yes
ENSONIG00000001264	ENSONIG00000001264	MDH1 (2 of 2)	GL831135.1:7341365-7346499	q1	q2	OK	6.38195	1.2054	-2.40448	-1.9236	0.01	0.0345549	yes
ENSONIG00000001265	ENSONIG00000001265	-	GL831153.1:4380961-4389343	q1	q2	OK	20.6512	20.6275	-0.00165844	-0.00627904	0.9824	0.984485	no
ENSONIG00000001266	ENSONIG00000001266	RAPGEF2	GL831156.1:2560496-2665781	q1	q2	NOTEST	1.48221	1.93835	0.387077	0	1	1	no
ENSONIG00000001267	ENSONIG00000001267	MLX	GL831149.1:2916233-2927393	q1	q2	NOTEST	2.21088	1.29094	-0.776197	0	1	1	no
ENSONIG00000001268	ENSONIG00000001268	KCTD14	GL831203.1:2461144-2466094	q1	q2	NOTEST	0.787882	0.488523	-0.689554	0	1	1	no
ENSONIG00000001269	ENSONIG00000001269	KIF26B (2 of 2)	GL831143.1:7542409-7572703	q1	q2	NOTEST	0.143938	0.0572917	-1.32905	0	1	1	no
ENSONIG00000001270	ENSONIG00000001270	-	GL831203.1:2469239-2472885	q1	q2	NOTEST	0.0667927	0	#NAME?	0	1	1	no
ENSONIG00000001271	ENSONIG00000001271	WDPCP	GL831135.1:7371501-7434799	q1	q2	NOTEST	0.0258436	0.0282917	0.130572	0	1	1	no
ENSONIG00000001272	ENSONIG00000001272	INTS4	GL831203.1:2473531-2483648	q1	q2	NOTEST	2.32123	1.89803	-0.290386	0	1	1	no
ENSONIG00000001273	ENSONIG00000001273	FMNL1 (2 of 2)	GL831149.1:2928907-2941149	q1	q2	NOTEST	0.645689	0.553199	-0.22304	0	1	1	no
ENSONIG00000001274	ENSONIG00000001274	-	GL831153.1:4380961-4389343	q1	q2	OK	12.9373	7.4988	-0.786809	-1.23248	0.045	0.111683	no
ENSONIG00000001275	ENSONIG00000001275	CNST (1 of 2)	GL831143.1:7574118-7595267	q1	q2	NOTEST	0.907656	1.31356	0.533264	0	1	1	no
ENSONIG00000001276	ENSONIG00000001276	SNAP25 (1 of 2)	GL831143.1:7616394-7652600	q1	q2	OK	8.44858	8.69196	0.040973	0.0585949	0.9146	0.948326	no
ENSONIG00000001277	ENSONIG00000001277	PCNT	GL831153.1:4403308-4437597	q1	q2	NOTEST	1.82915	2.41835	0.402847	0	1	1	no
ENSONIG00000001278	ENSONIG00000001278	OTX1	GL831135.1:7440096-7444135	q1	q2	NOTEST	0	0	0	0	1	1	no
ENSONIG00000001279	ENSONIG00000001279	SRCIN1 (1 of 2)	GL831149.1:2947280-2987565	q1	q2	NOTEST	0.779507	1.46555	0.910808	0	1	1	no
ENSONIG00000001280	ENSONIG00000001280	C11ORF67	GL831203.1:2484646-2485484	q1	q2	OK	7.78215	5.69501	-0.450471	-0.336836	0.57125	0.69854	no
ENSONIG00000001281	ENSONIG00000001281	EHBP1	GL831135.1:7451305-7608504	q1	q2	NOTEST	1.6191	1.56047	-0.0532148	0	1	1	no
ENSONIG00000001282	ENSONIG00000001282	ANKRD5	GL831143.1:7689762-7701874	q1	q2	NOTEST	0.302581	0.257274	-0.234016	0	1	1	no
ENSONIG00000001283	ENSONIG00000001283	EIF3K	GL831203.1:2508928-2514410	q1	q2	OK	65.9664	86.6925	0.394175	3.13406	5e-05	0.000373456	yes
ENSONIG00000001284	ENSONIG00000001284	CAPN12	GL831203.1:2516304-2537596	q1	q2	NOTEST	1.2914	2.19212	0.763391	0	1	1	no
ENSONIG00000001285	ENSONIG00000001285	ATG9A	GL831153.1:4441418-4451821	q1	q2	OK	4.74386	5.02617	0.0833979	0.270338	0.6402	0.75631	no
ENSONIG00000001286	ENSONIG00000001286	-	GL831149.1:3063534-3072451	q1	q2	OK	76.0945	62.1514	-0.292004	-2.87676	5e-05	0.000373456	yes
ENSONIG00000001287	ENSONIG00000001287	FSTL5	GL831156.1:2821157-2935520	q1	q2	NOTEST	2.33422	2.64722	0.181537	0	1	1	no
ENSONIG00000001288	ENSONIG00000001288	WNT9B	GL831149.1:3074404-3080582	q1	q2	NOTEST	0.0491824	0	#NAME?	0	1	1	no
ENSONIG00000001289	ENSONIG00000001289	-	GL831135.1:7796263-7884553	q1	q2	NOTEST	0.123631	0.0637487	-0.955569	0	1	1	no
ENSONIG00000001290	ENSONIG00000001290	EMILIN1 (2 of 2)	GL831143.1:7706713-7735563	q1	q2	NOTEST	0.746825	0.73224	-0.0284544	0	1	1	no
ENSONIG00000001291	ENSONIG00000001291	GOSR2	GL831149.1:3090561-3094576	q1	q2	OK	10.0005	9.91476	-0.0124276	-0.030714	0.9691	0.977073	no
ENSONIG00000001292	ENSONIG00000001292	GPATCH8	GL831149.1:3096890-3123837	q1	q2	OK	25.816	23.7731	-0.118932	-0.900223	0.11645	0.225826	no
ENSONIG00000001293	ENSONIG00000001293	STMN4 (1 of 2)	GL831143.1:7789287-7793686	q1	q2	NOTEST	0	0	0	0	1	1	no
ENSONIG00000001294	ENSONIG00000001294	-	GL831143.1:7795945-7799447	q1	q2	NOTEST	0	0	0	0	1	1	no
ENSONIG00000001295	ENSONIG00000001295	MCM3	GL831143.1:7802373-7809726	q1	q2	NOTEST	0.385743	0.178132	-1.11469	0	1	1	no
ENSONIG00000001296	ENSONIG00000001296	QDPR	GL831156.1:3059977-3071342	q1	q2	OK	30.8272	25.9853	-0.246508	-1.27827	0.0272	0.0762983	no
ENSONIG00000001297	ENSONIG00000001297	MAP3K14	GL831149.1:3135027-3153607	q1	q2	OK	14.0577	16.4219	0.224267	0.79551	0.1696	0.297024	no
ENSONIG00000001298	ENSONIG00000001298	-	GL831153.1:4470838-4507985	q1	q2	NOTEST	0.55382	0.40274	-0.459571	0	1	1	no
ENSONIG00000001299	ENSONIG00000001299	BAX	GL831149.1:3135027-3153607	q1	q2	OK	14.9415	18.3981	0.300232	0.288768	0.61985	0.738582	no
ENSONIG00000001300	ENSONIG00000001300	RPS11	GL831149.1:3135027-3153607	q1	q2	OK	407.977	664.682	0.704176	13.6873	5e-05	0.000373456	yes
ENSONIG00000001301	ENSONIG00000001301	LDB2	GL831156.1:3164913-3199725	q1	q2	OK	5.30311	3.69802	-0.520086	-0.607433	0.30525	0.451592	no
ENSONIG00000001302	ENSONIG00000001302	TAPT1 (2 of 2)	GL831156.1:3203486-3225813	q1	q2	NOTEST	0.203298	0.340743	0.745091	0	1	1	no
ENSONIG00000001303	ENSONIG00000001303	ZNF395 (2 of 2)	GL831143.1:7826454-7852728	q1	q2	NOTEST	0.321067	0.283978	-0.177093	0	1	1	no
ENSONIG00000001304	ENSONIG00000001304	LFNG	GL831149.1:3189850-3199658	q1	q2	NOTEST	2.70689	3.18037	0.232562	0	1	1	no
ENSONIG00000001305	ENSONIG00000001305	PNOC (2 of 2)	GL831143.1:7826454-7852728	q1	q2	NOTEST	0.953566	0	#NAME?	0	1	1	no
ENSONIG00000001306	ENSONIG00000001306	-	GL831143.1:7875024-7884102	q1	q2	NOTEST	0.303895	0.137899	-1.13996	0	1	1	no
ENSONIG00000001307	ENSONIG00000001307	ELP3	GL831143.1:7889607-7942559	q1	q2	OK	5.7149	3.77287	-0.599067	-0.995093	0.07775	0.169311	no
ENSONIG00000001308	ENSONIG00000001308	PROM1 (1 of 2)	GL831156.1:3232299-3316030	q1	q2	NOTEST	0.282036	0.503911	0.837291	0	1	1	no
ENSONIG00000001309	ENSONIG00000001309	TTYH3 (1 of 2)	GL831149.1:3211575-3237661	q1	q2	OK	5.17333	4.37841	-0.240687	-0.750614	0.1891	0.321506	no
ENSONIG00000001310	ENSONIG00000001310	FAM96B	GL831135.1:7935053-7937096	q1	q2	OK	4.76758	1.0426	-2.19307	-1.0994	0.25515	0.396991	no
ENSONIG00000001311	ENSONIG00000001311	KIF13B (2 of 2)	GL831143.1:7889607-7942559	q1	q2	NOTEST	0.291882	0.334761	0.197744	0	1	1	no
ENSONIG00000001312	ENSONIG00000001312	-	GL831153.1:4520488-4521874	q1	q2	OK	30.9192	22.4472	-0.461967	-0.522804	0.3422	0.489781	no
ENSONIG00000001313	ENSONIG00000001313	WIPF1	GL831135.1:7940667-7966285	q1	q2	NOTEST	0.979395	1.74869	0.836309	0	1	1	no
ENSONIG00000001314	ENSONIG00000001314	SNX8	GL831149.1:3238519-3254507	q1	q2	NOTEST	0.623255	1.25136	1.0056	0	1	1	no
ENSONIG00000001315	ENSONIG00000001315	TSPEAR (2 of 2)	GL831153.1:4525660-4532448	q1	q2	NOTEST	0	0	0	0	1	1	no
ENSONIG00000001316	ENSONIG00000001316	ACTN4	GL831203.1:2542676-2601710	q1	q2	OK	27.4183	26.994	-0.0225004	-0.125556	0.82015	0.884266	no
ENSONIG00000001317	ENSONIG00000001317	GPR155	GL831135.1:7967187-7975491	q1	q2	NOTEST	0.323483	0.400348	0.307567	0	1	1	no
ENSONIG00000001318	ENSONIG00000001318	USP40	GL831153.1:4533401-4547454	q1	q2	NOTEST	4.30425	4.28866	-0.00523778	0	1	1	no
ENSONIG00000001319	ENSONIG00000001319	NUDT1	GL831149.1:3238519-3254507	q1	q2	NOTEST	0.880181	0.992082	0.172659	0	1	1	no
ENSONIG00000001320	ENSONIG00000001320	TMEM41A (2 of 2)	GL831135.1:7982605-7987795	q1	q2	NOTEST	0.214529	0.275492	0.360837	0	1	1	no
ENSONIG00000001321	ENSONIG00000001321	FTSJ2	GL831149.1:3255704-3260009	q1	q2	NOTEST	0.402139	0.153053	-1.39367	0	1	1	no
ENSONIG00000001322	ENSONIG00000001322	PSMG3	GL831149.1:3480884-3485603	q1	q2	NOTEST	1.31136	1.55387	0.244805	0	1	1	no
ENSONIG00000001323	ENSONIG00000001323	TMEM184A	GL831149.1:3486942-3505073	q1	q2	OK	5.25161	6.04104	0.202038	0.450112	0.4203	0.562756	no
ENSONIG00000001324	ENSONIG00000001324	CDH5	GL831135.1:8054040-8073365	q1	q2	OK	4.44813	8.03169	0.852504	2.12015	0.00105	0.00541266	yes
ENSONIG00000001325	ENSONIG00000001325	FGFBP2	GL831156.1:3322292-3324367	q1	q2	NOTEST	0	0	0	0	1	1	no
ENSONIG00000001326	ENSONIG00000001326	FABP7	GL831153.1:4548630-4550235	q1	q2	OK	9.01431	15.0347	0.738002	1.72352	0.00485	0.0192926	yes
ENSONIG00000001327	ENSONIG00000001327	ANXA5 (1 of 2)	GL831156.1:3333324-3351928	q1	q2	NOTEST	2.77707	1.39207	-0.996331	0	1	1	no
ENSONIG00000001328	ENSONIG00000001328	HMBOX1 (1 of 2)	GL831143.1:7952980-7974617	q1	q2	NOTEST	0.350747	0.623008	0.828821	0	1	1	no
ENSONIG00000001329	ENSONIG00000001329	MAFK	GL831149.1:3510414-3517232	q1	q2	OK	8.54692	11.2333	0.394305	0.703572	0.2389	0.382204	no
ENSONIG00000001330	ENSONIG00000001330	DISP1	GL831143.1:8036775-8079517	q1	q2	NOTEST	2.61062	3.57906	0.455187	0	1	1	no
ENSONIG00000001331	ENSONIG00000001331	INTS1	GL831149.1:3522492-3540310	q1	q2	NOTEST	1.81591	1.35065	-0.427034	0	1	1	no
ENSONIG00000001332	ENSONIG00000001332	MTX2	GL831135.1:8122247-8127962	q1	q2	NOTEST	2.33595	1.24009	-0.913566	0	1	1	no
ENSONIG00000001333	ENSONIG00000001333	TLR5 (2 of 2)	GL831143.1:8096489-8123594	q1	q2	NOTEST	0.243204	0.251023	0.0456531	0	1	1	no
ENSONIG00000001334	ENSONIG00000001334	-	GL831153.1:4570274-4572177	q1	q2	NOTEST	1.35327	0.277951	-2.28354	0	1	1	no
ENSONIG00000001335	ENSONIG00000001335	FYN	GL831153.1:4590428-4599386	q1	q2	NOTEST	3.38738	1.50039	-1.17484	0	1	1	no
ENSONIG00000001336	ENSONIG00000001336	BROX	GL831143.1:8269624-8284566	q1	q2	OK	12.2556	12.7732	0.0596706	0.154072	0.7892	0.864382	no
ENSONIG00000001337	ENSONIG00000001337	-	GL831203.1:2614486-2621420	q1	q2	NOTEST	0	0.277198	inf	0	1	1	no
ENSONIG00000001338	ENSONIG00000001338	CCNA2	GL831156.1:3361896-3366311	q1	q2	NOTEST	0.0914366	0	#NAME?	0	1	1	no
ENSONIG00000001339	ENSONIG00000001339	-	GL831153.1:4612140-4614926	q1	q2	NOTEST	1.05598	0.304105	-1.79594	0	1	1	no
ENSONIG00000001340	ENSONIG00000001340	COL10A1 (2 of 2)	GL831153.1:4619934-4625155	q1	q2	NOTEST	0.0493712	0	#NAME?	0	1	1	no
ENSONIG00000001341	ENSONIG00000001341	-	GL831135.1:8132811-8134214	q1	q2	NOTEST	0	0	0	0	1	1	no
ENSONIG00000001342	ENSONIG00000001342	-	GL831153.1:4644454-4649142	q1	q2	NOTEST	0	0.0596307	inf	0	1	1	no
ENSONIG00000001343	ENSONIG00000001343	-	GL831135.1:8150584-8154870	q1	q2	NOTEST	0.0480445	0	#NAME?	0	1	1	no
ENSONIG00000001344	ENSONIG00000001344	MEP1A (2 of 2)	GL831143.1:8290815-8320674	q1	q2	NOTEST	0	0	0	0	1	1	no
ENSONIG00000001345	ENSONIG00000001345	SLC8A2 (1 of 2)	GL831203.1:2796217-2839993	q1	q2	NOTEST	0.357584	0.603715	0.755585	0	1	1	no
ENSONIG00000001346	ENSONIG00000001346	KIAA1715 (2 of 2)	GL831135.1:8175061-8183782	q1	q2	NOTEST	2.69334	2.72843	0.0186747	0	1	1	no
ENSONIG00000001347	ENSONIG00000001347	FHL5	GL831153.1:4649671-4652105	q1	q2	NOTEST	0.117219	0.122052	0.0582887	0	1	1	no
ENSONIG00000001348	ENSONIG00000001348	-	GL831149.1:3547804-3551917	q1	q2	NOTEST	0.144053	0.104963	-0.456718	0	1	1	no
ENSONIG00000001349	ENSONIG00000001349	MICALL2	GL831149.1:3551986-3564832	q1	q2	NOTEST	0.325741	0.597622	0.875508	0	1	1	no
ENSONIG00000001350	ENSONIG00000001350	MEP1A (1 of 2)	GL831143.1:8330057-8333365	q1	q2	NOTEST	0	0	0	0	1	1	no
ENSONIG00000001351	ENSONIG00000001351	MANEA	GL831153.1:4672677-4675833	q1	q2	NOTEST	1.49843	1.50504	0.0063525	0	1	1	no
ENSONIG00000001352	ENSONIG00000001352	UNCX	GL831149.1:3638261-3645832	q1	q2	NOTEST	0	0.0244964	inf	0	1	1	no
ENSONIG00000001353	ENSONIG00000001353	CHRNA1 (2 of 2)	GL831135.1:8188261-8196382	q1	q2	NOTEST	0	0	0	0	1	1	no
ENSONIG00000001354	ENSONIG00000001354	BBS7	GL831156.1:3369307-3376177	q1	q2	NOTEST	1.12153	0.218402	-2.36042	0	1	1	no
ENSONIG00000001355	ENSONIG00000001355	ZFAND2A	GL831149.1:3656159-3662538	q1	q2	OK	42.6975	85.4302	1.0006	6.78437	5e-05	0.000373456	yes
ENSONIG00000001356	ENSONIG00000001356	PPP1CB (1 of 2)	GL831153.1:4681057-4692038	q1	q2	OK	11.0701	5.36984	-1.04372	-1.76637	0.0049	0.0194423	yes
ENSONIG00000001357	ENSONIG00000001357	-	GL831203.1:2863435-2866240	q1	q2	NOTEST	0	0	0	0	1	1	no
ENSONIG00000001358	ENSONIG00000001358	YPEL5	GL831153.1:4711966-4712452	q1	q2	OK	33.8785	38.8765	0.198528	0.37523	0.5215	0.655612	no
ENSONIG00000001359	ENSONIG00000001359	-	GL831149.1:3677396-3687747	q1	q2	NOTEST	0.338022	0.261864	-0.368297	0	1	1	no
ENSONIG00000001360	ENSONIG00000001360	SRSF7	GL831203.1:2876137-2888252	q1	q2	OK	55.8526	68.9306	0.303521	0.907838	0.1042	0.210103	no
ENSONIG00000001361	ENSONIG00000001361	LCLAT1	GL831153.1:4718304-4733806	q1	q2	NOTEST	4.31819	3.45118	-0.323336	0	1	1	no
ENSONIG00000001362	ENSONIG00000001362	AXIN1 (1 of 2)	GL831149.1:3699223-3720676	q1	q2	NOTEST	0	0.256479	inf	0	1	1	no
ENSONIG00000001363	ENSONIG00000001363	TMEM33	GL831156.1:3376827-3382276	q1	q2	OK	36.5145	35.8779	-0.0253729	-0.156942	0.7793	0.857421	no
ENSONIG00000001364	ENSONIG00000001364	CDH11	GL831135.1:8295087-8345098	q1	q2	NOTEST	2.28941	2.37511	0.0530203	0	1	1	no
ENSONIG00000001365	ENSONIG00000001365	LBH	GL831153.1:4738949-4748514	q1	q2	OK	36.5517	44.311	0.277724	1.88379	0.001	0.00520613	yes
ENSONIG00000001366	ENSONIG00000001366	BMP4	GL831153.1:4801392-4807027	q1	q2	OK	8.74434	9.23347	0.0785236	0.227032	0.702	0.80171	no
ENSONIG00000001367	ENSONIG00000001367	DDHD1 (1 of 2)	GL831153.1:4864272-4886312	q1	q2	OK	5.16164	10.2669	0.992095	4.44593	5e-05	0.000373456	yes
ENSONIG00000001368	ENSONIG00000001368	PLA2G10	GL831149.1:3735546-3740220	q1	q2	NOTEST	0	0.0703613	inf	0	1	1	no
ENSONIG00000001369	ENSONIG00000001369	PHOX2B	GL831156.1:3425740-3429260	q1	q2	NOTEST	0.0598649	0.0783183	0.38764	0	1	1	no
ENSONIG00000001370	ENSONIG00000001370	VSTM5	GL831203.1:2918390-2925487	q1	q2	OK	22.1771	14.3271	-0.630323	-1.08473	0.06135	0.141745	no
ENSONIG00000001371	ENSONIG00000001371	LIMCH1 (1 of 2)	GL831156.1:3432474-3517322	q1	q2	NOTEST	1.73215	2.39198	0.465645	0	1	1	no
ENSONIG00000001372	ENSONIG00000001372	MED17	GL831203.1:2927185-2937010	q1	q2	NOTEST	3.78838	1.97682	-0.938398	0	1	1	no
ENSONIG00000001373	ENSONIG00000001373	ZC3H7A	GL831149.1:3745926-3768933	q1	q2	OK	8.52441	9.77942	0.198148	0.721292	0.2095	0.345887	no
ENSONIG00000001374	ENSONIG00000001374	FERMT2	GL831153.1:4887976-4926140	q1	q2	OK	16.1342	26.0002	0.688404	3.23416	5e-05	0.000373456	yes
ENSONIG00000001375	ENSONIG00000001375	-	GL831203.1:2989283-2997328	q1	q2	NOTEST	0	0	0	0	1	1	no
ENSONIG00000001376	ENSONIG00000001376	-	GL831385.1:3546-21034	q1	q2	OK	13.426	15.5496	0.211846	1.36561	0.0186	0.0567291	no
ENSONIG00000001377	ENSONIG00000001377	-	GL831156.1:3776452-3779706	q1	q2	NOTEST	0	0	0	0	1	1	no
ENSONIG00000001378	ENSONIG00000001378	PCGF1	GL831156.1:3783742-3793720	q1	q2	NOTEST	1.42264	1.03461	-0.45949	0	1	1	no
ENSONIG00000001379	ENSONIG00000001379	MCM8	GL831135.1:9045408-9053296	q1	q2	NOTEST	0.0600279	0.202249	1.75243	0	1	1	no
ENSONIG00000001380	ENSONIG00000001380	RMI2	GL831149.1:3745926-3768933	q1	q2	NOTEST	0	0	0	0	1	1	no
ENSONIG00000001381	ENSONIG00000001381	UBFD1	GL831149.1:3770377-3774185	q1	q2	OK	8.53866	8.46657	-0.0122314	-0.0205459	0.95215	0.968559	no
ENSONIG00000001382	ENSONIG00000001382	-	GL831385.1:37331-39042	q1	q2	NOTEST	0.155118	0.161993	0.0625622	0	1	1	no
ENSONIG00000001383	ENSONIG00000001383	TMEM79 (2 of 2)	GL831385.1:66805-69823	q1	q2	OK	13.9693	14.3047	0.0342327	0.117743	0.8397	0.897955	no
ENSONIG00000001384	ENSONIG00000001384	ARHGEF2 (1 of 2)	GL831385.1:79140-109578	q1	q2	OK	7.45851	6.34206	-0.233935	-0.917273	0.10455	0.210472	no
ENSONIG00000001385	ENSONIG00000001385	-	GL831156.1:3849206-3862099	q1	q2	NOTEST	2.45407	2.30085	-0.0930138	0	1	1	no
ENSONIG00000001386	ENSONIG00000001386	JMJD5	GL831149.1:3795310-3799979	q1	q2	NOTEST	0.94326	0.615213	-0.616569	0	1	1	no
ENSONIG00000001387	ENSONIG00000001387	GJD2	GL831153.1:5090161-5095398	q1	q2	OK	16.7444	15.2361	-0.136181	-0.809961	0.15965	0.284592	no
ENSONIG00000001388	ENSONIG00000001388	HS3ST4	GL831149.1:3937744-4024269	q1	q2	NOTEST	0.0304834	0	#NAME?	0	1	1	no
ENSONIG00000001389	ENSONIG00000001389	ACTC1 (5 of 5)	GL831153.1:5096196-5100931	q1	q2	OK	9.45012	10.8613	0.200796	0.58175	0.3224	0.468695	no
ENSONIG00000001390	ENSONIG00000001390	HS3ST2 (1 of 2)	GL831149.1:4083503-4115191	q1	q2	NOTEST	0	0	0	0	1	1	no
ENSONIG00000001391	ENSONIG00000001391	PLCB1 (2 of 2)	GL831135.1:9073227-9104048	q1	q2	NOTEST	0	0	0	0	1	1	no
ENSONIG00000001392	ENSONIG00000001392	USP31 (2 of 2)	GL831149.1:4155718-4168531	q1	q2	NOTEST	0	0	0	0	1	1	no
ENSONIG00000001393	ENSONIG00000001393	ZCCHC3	GL831203.1:2997400-3002441	q1	q2	NOTEST	0	0	0	0	1	1	no
ENSONIG00000001394	ENSONIG00000001394	FAM222B (2 of 2)	GL831203.1:3100193-3106597	q1	q2	NOTEST	1.77402	1.28726	-0.462717	0	1	1	no
ENSONIG00000001395	ENSONIG00000001395	AQR	GL831153.1:5112979-5159291	q1	q2	NOTEST	3.66026	2.36142	-0.632295	0	1	1	no
ENSONIG00000001396	ENSONIG00000001396	FLOT2 (1 of 2)	GL831203.1:3109459-3121985	q1	q2	OK	11.7224	11.4564	-0.0331157	-0.0837275	0.89605	0.936038	no
ENSONIG00000001397	ENSONIG00000001397	-	GL831156.1:3887031-3901385	q1	q2	NOTEST	1.09873	0.667808	-0.71833	0	1	1	no
ENSONIG00000001398	ENSONIG00000001398	-	GL831385.1:121528-128621	q1	q2	OK	43.4825	41.7879	-0.0573504	-0.201973	0.7207	0.815161	no
ENSONIG00000001399	ENSONIG00000001399	BAIAP3	GL831149.1:4200918-4222157	q1	q2	OK	8.51773	12.8337	0.591399	3.74693	5e-05	0.000373456	yes
ENSONIG00000001400	ENSONIG00000001400	ATPBD4	GL831153.1:5163337-5222088	q1	q2	NOTEST	0.840599	1.09585	0.382562	0	1	1	no
ENSONIG00000001401	ENSONIG00000001401	-	GL831203.1:3175839-3213168	q1	q2	NOTEST	0.163265	0.149841	-0.123788	0	1	1	no
ENSONIG00000001402	ENSONIG00000001402	-	GL831156.1:3907278-3918084	q1	q2	NOTEST	0.0880155	0	#NAME?	0	1	1	no
ENSONIG00000001403	ENSONIG00000001403	MEIS2	GL831153.1:5378193-5453549	q1	q2	NOTEST	0.828729	1.50455	0.860365	0	1	1	no
ENSONIG00000001404	ENSONIG00000001404	PMVK	GL831385.1:130019-131936	q1	q2	OK	7.94757	8.51444	0.0993975	0.18341	0.75565	0.839181	no
ENSONIG00000001405	ENSONIG00000001405	ADAD1	GL831156.1:3991618-4007668	q1	q2	NOTEST	0	0	0	0	1	1	no
ENSONIG00000001406	ENSONIG00000001406	-	GL831156.1:4035921-4038795	q1	q2	NOTEST	0	0	0	0	1	1	no
ENSONIG00000001407	ENSONIG00000001407	DECR1	GL831385.1:132208-138363	q1	q2	OK	13.9354	16.1273	0.210744	0.599457	0.30325	0.449161	no
ENSONIG00000001408	ENSONIG00000001408	-	GL831385.1:234122-277932	q1	q2	NOTEST	0	0	0	0	1	1	no
ENSONIG00000001409	ENSONIG00000001409	-	GL831156.1:4050384-4054289	q1	q2	OK	4.86526	4.92999	0.0190681	0.0143888	0.93	0.958812	no
ENSONIG00000001410	ENSONIG00000001410	IQGAP3	GL831385.1:377197-400945	q1	q2	NOTEST	0.134423	0.124983	-0.105052	0	1	1	no
ENSONIG00000001411	ENSONIG00000001411	UNKL	GL831149.1:4282778-4295338	q1	q2	NOTEST	0.181906	0.410236	1.17326	0	1	1	no
ENSONIG00000001412	ENSONIG00000001412	SPRED1	GL831153.1:5580936-5612002	q1	q2	NOTEST	0.12521	0.423472	1.75792	0	1	1	no
ENSONIG00000001413	ENSONIG00000001413	NAPB (2 of 2)	GL831135.1:9112625-9122799	q1	q2	OK	5.86014	4.24057	-0.466679	-0.554585	0.3559	0.502034	no
ENSONIG00000001414	ENSONIG00000001414	FGF2	GL831156.1:4062108-4207716	q1	q2	NOTEST	0.58617	1.45115	1.3078	0	1	1	no
ENSONIG00000001415	ENSONIG00000001415	FAM98B	GL831153.1:5619873-5641038	q1	q2	NOTEST	4.11133	1.83297	-1.16542	0	1	1	no
ENSONIG00000001416	ENSONIG00000001416	NUDT6	GL831156.1:4062108-4207716	q1	q2	OK	6.28507	8.06159	0.359138	1.68397	0.00395	0.0164079	yes
ENSONIG00000001417	ENSONIG00000001417	SHISA9	GL831149.1:4326794-4349618	q1	q2	NOTEST	0.0446157	0	#NAME?	0	1	1	no
ENSONIG00000001418	ENSONIG00000001418	PTPN21	GL831153.1:5619873-5641038	q1	q2	NOTEST	3.52167	3.75964	0.0943339	0	1	1	no
ENSONIG00000001419	ENSONIG00000001419	MKL2 (2 of 2)	GL831149.1:4383777-4392200	q1	q2	OK	5.45885	5.87123	0.105065	0.285049	0.6214	0.739868	no
ENSONIG00000001420	ENSONIG00000001420	CDC5L	GL831135.1:9128672-9148981	q1	q2	OK	9.6571	7.2804	-0.407572	-1.53516	0.0101	0.0348049	yes
ENSONIG00000001421	ENSONIG00000001421	SPATA5	GL831156.1:4062108-4207716	q1	q2	OK	13.8291	21.2152	0.617387	3.70486	5e-05	0.000373456	yes
ENSONIG00000001422	ENSONIG00000001422	GDPD4 (2 of 2)	GL831203.1:3223885-3259868	q1	q2	NOTEST	2.16968	2.34238	0.110496	0	1	1	no
ENSONIG00000001423	ENSONIG00000001423	SNRNP25	GL831149.1:4399382-4402789	q1	q2	NOTEST	0.410991	0.798763	0.958661	0	1	1	no
ENSONIG00000001424	ENSONIG00000001424	POLR3K	GL831149.1:4403183-4405819	q1	q2	OK	16.6725	9.31894	-0.839231	-0.693032	0.2096	0.345887	no
ENSONIG00000001425	ENSONIG00000001425	C16ORF5	GL831149.1:4409356-4412695	q1	q2	OK	32.5935	39.8557	0.290203	0.834584	0.15045	0.272282	no
ENSONIG00000001426	ENSONIG00000001426	KCNK10 (1 of 2)	GL831153.1:5648848-5668433	q1	q2	NOTEST	0.125531	0.105541	-0.250236	0	1	1	no
ENSONIG00000001427	ENSONIG00000001427	ANKRD50	GL831156.1:4371519-4410265	q1	q2	NOTEST	1.78856	1.936	0.114276	0	1	1	no
ENSONIG00000001428	ENSONIG00000001428	MGRN1	GL831149.1:4422070-4428020	q1	q2	OK	14.8883	13.4456	-0.147045	-0.475615	0.40915	0.552058	no
ENSONIG00000001429	ENSONIG00000001429	-	GL831156.1:4470152-4475085	q1	q2	NOTEST	0.0416224	0	#NAME?	0	1	1	no
ENSONIG00000001430	ENSONIG00000001430	PAK1	GL831203.1:3279695-3348632	q1	q2	NOTEST	0.577936	0.882304	0.610367	0	1	1	no
ENSONIG00000001431	ENSONIG00000001431	FAT4	GL831156.1:4514670-4613571	q1	q2	NOTEST	0.278944	0.368367	0.401166	0	1	1	no
ENSONIG00000001432	ENSONIG00000001432	SUPT3H	GL831135.1:9128672-9148981	q1	q2	NOTEST	2.24028	1.79462	-0.320002	0	1	1	no
ENSONIG00000001433	ENSONIG00000001433	BDKRB2 (3 of 4)	GL831153.1:5683274-5686178	q1	q2	NOTEST	3.16136	3.32393	0.0723469	0	1	1	no
ENSONIG00000001434	ENSONIG00000001434	BDKRB1	GL831153.1:5807758-5809222	q1	q2	NOTEST	0	0.238345	inf	0	1	1	no
ENSONIG00000001435	ENSONIG00000001435	BDKRB2 (1 of 4)	GL831153.1:5816705-5820336	q1	q2	NOTEST	0.376877	0.212944	-0.823616	0	1	1	no
ENSONIG00000001436	ENSONIG00000001436	-	GL831135.1:9128672-9148981	q1	q2	NOTEST	0	0	0	0	1	1	no
ENSONIG00000001437	ENSONIG00000001437	FSTL1 (2 of 2)	GL831135.1:9149922-9152869	q1	q2	NOTEST	0	0	0	0	1	1	no
ENSONIG00000001438	ENSONIG00000001438	-	GL831153.1:5839400-5840227	q1	q2	NOTEST	0	0	0	0	1	1	no
ENSONIG00000001439	ENSONIG00000001439	AANAT (3 of 3)	GL831149.1:4435272-4436199	q1	q2	NOTEST	1.33957	3.99345	1.57586	0	1	1	no
ENSONIG00000001440	ENSONIG00000001440	GJA5 (2 of 2)	GL831135.1:9161431-9173282	q1	q2	NOTEST	0.0395938	0	#NAME?	0	1	1	no
ENSONIG00000001441	ENSONIG00000001441	-	GL831149.1:4437226-4446041	q1	q2	OK	4.97217	6.43276	0.371563	0.959974	0.0911	0.191103	no
ENSONIG00000001442	ENSONIG00000001442	LEPROTL1	GL831156.1:4862590-4866877	q1	q2	NOTEST	3.84785	2.67778	-0.523013	0	1	1	no
ENSONIG00000001443	ENSONIG00000001443	AQP11 (1 of 2)	GL831203.1:3471333-3474118	q1	q2	NOTEST	0.759616	0.484107	-0.649944	0	1	1	no
ENSONIG00000001444	ENSONIG00000001444	CLNS1A (1 of 2)	GL831203.1:3480260-3484592	q1	q2	OK	12.9697	11.1537	-0.217625	-0.396828	0.48205	0.619582	no
ENSONIG00000001445	ENSONIG00000001445	-	GL832064.1:1598-23991	q1	q2	NOTEST	2.63863	3.12512	0.244122	0	1	1	no
ENSONIG00000001446	ENSONIG00000001446	SRP72	GL831156.1:4867435-4876260	q1	q2	OK	29.1429	28.4592	-0.0342525	-0.178277	0.75415	0.838404	no
ENSONIG00000001447	ENSONIG00000001447	-	GL832145.1:6053-7211	q1	q2	NOTEST	0	0	0	0	1	1	no
ENSONIG00000001448	ENSONIG00000001448	-	GL831135.1:9446036-9451137	q1	q2	OK	72.378	97.45	0.429112	4.02096	5e-05	0.000373456	yes
ENSONIG00000001449	ENSONIG00000001449	-	GL832145.1:9873-12614	q1	q2	NOTEST	0	0	0	0	1	1	no
ENSONIG00000001450	ENSONIG00000001450	RBM45	GL831135.1:9452968-9460045	q1	q2	OK	14.752	17.9113	0.279955	1.00696	0.068	0.152678	no
ENSONIG00000001451	ENSONIG00000001451	TTC24	GL831385.1:402110-405728	q1	q2	NOTEST	0	0	0	0	1	1	no
ENSONIG00000001452	ENSONIG00000001452	-	GL831385.1:412606-417843	q1	q2	NOTEST	1.71915	2.17837	0.341556	0	1	1	no
ENSONIG00000001453	ENSONIG00000001453	MPG	GL831149.1:4473635-4476354	q1	q2	NOTEST	3.08176	0.657278	-2.22918	0	1	1	no
ENSONIG00000001454	ENSONIG00000001454	NPRL3	GL831149.1:4477313-4490287	q1	q2	OK	7.46786	7.12837	-0.0671227	-0.16222	0.77815	0.856865	no
ENSONIG00000001455	ENSONIG00000001455	-	GL831385.1:427917-434938	q1	q2	NOTEST	0.0783931	0.0821503	0.0675389	0	1	1	no
ENSONIG00000001456	ENSONIG00000001456	ZC3H15	GL831135.1:9461482-9474734	q1	q2	OK	17.0259	21.7071	0.350434	1.444	0.01315	0.043118	yes
ENSONIG00000001457	ENSONIG00000001457	-	GL831149.1:4494466-4495263	q1	q2	OK	243.387	334.299	0.457886	2.84247	5e-05	0.000373456	yes
ENSONIG00000001458	ENSONIG00000001458	-	GL831491.1:46977-48214	q1	q2	NOTEST	0.964378	1.0079	0.0636787	0	1	1	no
ENSONIG00000001459	ENSONIG00000001459	-	GL831491.1:59151-60829	q1	q2	NOTEST	0.306941	0.312651	0.0265922	0	1	1	no
ENSONIG00000001460	ENSONIG00000001460	POLR3GL	GL831385.1:443926-446061	q1	q2	OK	12.2285	18.2622	0.578612	1.08991	0.06055	0.140464	no
ENSONIG00000001461	ENSONIG00000001461	-	GL831491.1:130050-131172	q1	q2	NOTEST	0.584965	0.203884	-1.5206	0	1	1	no
ENSONIG00000001462	ENSONIG00000001462	-	GL831491.1:146105-154502	q1	q2	NOTEST	0.554677	0.353381	-0.650426	0	1	1	no
ENSONIG00000001463	ENSONIG00000001463	DUSP19 (1 of 2)	GL831135.1:9692828-9751031	q1	q2	NOTEST	0.426897	0.324673	-0.394898	0	1	1	no
ENSONIG00000001464	ENSONIG00000001464	-	GL831491.1:162987-184135	q1	q2	NOTEST	0.648523	0.460475	-0.494037	0	1	1	no
ENSONIG00000001465	ENSONIG00000001465	EPDR1	GL831491.1:189724-193262	q1	q2	OK	8.03619	14.4036	0.841846	1.21923	0.0532	0.127166	no
ENSONIG00000001466	ENSONIG00000001466	MICA	GL831385.1:447961-465059	q1	q2	NOTEST	1.07352	1.26481	0.236567	0	1	1	no
ENSONIG00000001467	ENSONIG00000001467	TXNIP (2 of 2)	GL831385.1:488878-491413	q1	q2	NOTEST	3.55205	2.81232	-0.33689	0	1	1	no
ENSONIG00000001468	ENSONIG00000001468	NCKAP1	GL831135.1:9692828-9751031	q1	q2	OK	8.77812	8.80213	0.00394053	0.0144706	0.98	0.983177	no
ENSONIG00000001469	ENSONIG00000001469	NOL7	GL831491.1:194122-199359	q1	q2	OK	7.76671	6.27619	-0.307413	-0.362059	0.5647	0.692415	no
ENSONIG00000001470	ENSONIG00000001470	-	GL831149.1:4499185-4530460	q1	q2	OK	5.90671	6.38285	0.111845	0.257272	0.5823	0.7073	no
ENSONIG00000001471	ENSONIG00000001471	RANBP9	GL831491.1:206005-232772	q1	q2	OK	6.74565	9.67742	0.520664	1.31797	0.0231	0.0673509	no
ENSONIG00000001472	ENSONIG00000001472	-	GL831341.1:10976-170622	q1	q2	NOTEST	0.103114	0	#NAME?	0	1	1	no
ENSONIG00000001473	ENSONIG00000001473	-	GL831149.1:4499185-4530460	q1	q2	NOTEST	0	0	0	0	1	1	no
ENSONIG00000001474	ENSONIG00000001474	BNIPL (1 of 2)	GL831385.1:497648-507527	q1	q2	NOTEST	0.637404	0.165043	-1.94936	0	1	1	no
ENSONIG00000001475	ENSONIG00000001475	-	GL831341.1:173461-175222	q1	q2	NOTEST	0	0.193825	inf	0	1	1	no
ENSONIG00000001476	ENSONIG00000001476	MAG	GL831341.1:185511-192579	q1	q2	NOTEST	0.264613	0.259318	-0.0291642	0	1	1	no
ENSONIG00000001477	ENSONIG00000001477	SNAPC1 (2 of 2)	GL831156.1:4879413-4880648	q1	q2	NOTEST	0.15869	0	#NAME?	0	1	1	no
ENSONIG00000001478	ENSONIG00000001478	ARL9	GL831156.1:4882062-4886969	q1	q2	NOTEST	4.06645	2.49066	-0.707241	0	1	1	no
ENSONIG00000001479	ENSONIG00000001479	LSR	GL831341.1:208456-219268	q1	q2	OK	17.3066	12.5732	-0.460968	-1.61772	0.00455	0.0183547	yes
ENSONIG00000001480	ENSONIG00000001480	-	GL831149.1:4499185-4530460	q1	q2	NOTEST	0	0	0	0	1	1	no
ENSONIG00000001481	ENSONIG00000001481	PPP1R1C	GL831135.1:9758165-9772749	q1	q2	NOTEST	0	0	0	0	1	1	no
ENSONIG00000001482	ENSONIG00000001482	HOPX	GL831156.1:4905906-4913497	q1	q2	NOTEST	1.71962	2.49843	0.538934	0	1	1	no
ENSONIG00000001483	ENSONIG00000001483	SEC24B	GL831156.1:4931302-4958301	q1	q2	OK	4.70324	4.95416	0.0749851	0.216747	0.70795	0.805554	no
ENSONIG00000001484	ENSONIG00000001484	PRUNE	GL831385.1:510813-520491	q1	q2	OK	7.4721	9.15222	0.292608	0.616101	0.2735	0.418375	no
ENSONIG00000001485	ENSONIG00000001485	PLEKHA3	GL831135.1:9781278-9792508	q1	q2	NOTEST	0.691016	0.767219	0.150919	0	1	1	no
ENSONIG00000001486	ENSONIG00000001486	-	GL831341.1:350750-427825	q1	q2	NOTEST	0.240612	0.33214	0.465082	0	1	1	no
ENSONIG00000001487	ENSONIG00000001487	FAM134B	GL831491.1:244108-272094	q1	q2	OK	12.7899	12.0391	-0.0872706	-0.538416	0.34625	0.49322	no
ENSONIG00000001488	ENSONIG00000001488	-	GL831149.1:4499185-4530460	q1	q2	NOTEST	0.143052	0	#NAME?	0	1	1	no
ENSONIG00000001489	ENSONIG00000001489	-	GL831149.1:4538183-4538912	q1	q2	OK	932.574	1200.18	0.363961	4.37636	5e-05	0.000373456	yes
ENSONIG00000001490	ENSONIG00000001490	MYO1E	GL831385.1:526657-539850	q1	q2	NOTEST	0.476685	0.664877	0.480051	0	1	1	no
ENSONIG00000001491	ENSONIG00000001491	-	GL831135.1:9793266-9794772	q1	q2	NOTEST	0	0	0	0	1	1	no
ENSONIG00000001492	ENSONIG00000001492	-	GL831491.1:275500-285128	q1	q2	NOTEST	0.186642	0.191332	0.0358015	0	1	1	no
ENSONIG00000001493	ENSONIG00000001493	CGB1	GL831135.1:9799939-9802946	q1	q2	OK	2464.68	1280.37	-0.944841	-24.2863	5e-05	0.000373456	yes
ENSONIG00000001494	ENSONIG00000001494	CCNE2 (1 of 2)	GL831341.1:441281-449099	q1	q2	NOTEST	0	0.240159	inf	0	1	1	no
ENSONIG00000001495	ENSONIG00000001495	COX20	GL831135.1:9804394-9807367	q1	q2	OK	50.2483	43.6333	-0.203647	-1.15671	0.0494	0.120324	no
ENSONIG00000001496	ENSONIG00000001496	-	GL831135.1:9811269-9822297	q1	q2	NOTEST	0	0	0	0	1	1	no
ENSONIG00000001497	ENSONIG00000001497	SLC22A7 (1 of 4)	GL831135.1:9811269-9822297	q1	q2	NOTEST	0	0	0	0	1	1	no
ENSONIG00000001498	ENSONIG00000001498	-	GL831491.1:395027-439649	q1	q2	NOTEST	1.20204	1.28091	0.0916866	0	1	1	no
ENSONIG00000001499	ENSONIG00000001499	-	GL831491.1:395027-439649	q1	q2	NOTEST	1.69073	1.18344	-0.514664	0	1	1	no
ENSONIG00000001500	ENSONIG00000001500	TSTD2	GL831156.1:4984512-5001129	q1	q2	NOTEST	3.34779	2.64388	-0.340554	0	1	1	no
ENSONIG00000001501	ENSONIG00000001501	TP53INP1	GL831341.1:458227-466075	q1	q2	NOTEST	3.01339	1.98078	-0.605316	0	1	1	no
ENSONIG00000001502	ENSONIG00000001502	NCBP1	GL831156.1:4984512-5001129	q1	q2	OK	5.05235	3.95453	-0.353447	-0.802164	0.1629	0.28843	no
ENSONIG00000001503	ENSONIG00000001503	NAGPA	GL831341.1:486459-505727	q1	q2	OK	6.18757	4.56777	-0.437884	-0.842584	0.15295	0.275222	no
ENSONIG00000001504	ENSONIG00000001504	-	GL831149.1:4539759-4541291	q1	q2	OK	296.852	420.29	0.501644	6.8868	5e-05	0.000373456	yes
ENSONIG00000001505	ENSONIG00000001505	EPAS1	GL831135.1:9840160-9890262	q1	q2	OK	16.0502	22.8725	0.511021	4.46018	5e-05	0.000373456	yes
ENSONIG00000001506	ENSONIG00000001506	C8ORF38	GL831341.1:506040-530335	q1	q2	NOTEST	1.19669	0.347806	-1.7827	0	1	1	no
ENSONIG00000001507	ENSONIG00000001507	-	GL831341.1:586938-587709	q1	q2	NOTEST	0	0	0	0	1	1	no
ENSONIG00000001508	ENSONIG00000001508	WDR73	GL831341.1:695342-706823	q1	q2	NOTEST	0.152816	0.287765	0.913093	0	1	1	no
ENSONIG00000001509	ENSONIG00000001509	SORCS2	GL831419.1:1059-383477	q1	q2	NOTEST	0.570188	0.499326	-0.191455	0	1	1	no
ENSONIG00000001510	ENSONIG00000001510	PI4KB	GL831385.1:556079-565164	q1	q2	OK	11.8359	8.16533	-0.535583	-1.79519	0.00355	0.0149738	yes
ENSONIG00000001511	ENSONIG00000001511	C8ORF37	GL831341.1:718086-731275	q1	q2	NOTEST	2.48181	1.45324	-0.772121	0	1	1	no
ENSONIG00000001512	ENSONIG00000001512	-	GL831341.1:734333-738786	q1	q2	NOTEST	3.33445	4.30616	0.368955	0	1	1	no
ENSONIG00000001513	ENSONIG00000001513	SELENBP1	GL831385.1:570291-574667	q1	q2	NOTEST	1.03778	1.65303	0.671604	0	1	1	no
ENSONIG00000001514	ENSONIG00000001514	COL19A1	GL831341.1:747341-779030	q1	q2	NOTEST	0	0	0	0	1	1	no
ENSONIG00000001515	ENSONIG00000001515	-	GL831149.1:4551747-4552404	q1	q2	NOTEST	0	0.535632	inf	0	1	1	no
ENSONIG00000001516	ENSONIG00000001516	GRPEL1	GL831419.1:404818-420507	q1	q2	OK	30.2552	29.6535	-0.0289817	-0.152161	0.788	0.864271	no
ENSONIG00000001517	ENSONIG00000001517	-	GL831149.1:4552838-4553559	q1	q2	NOTEST	0	0	0	0	1	1	no
ENSONIG00000001518	ENSONIG00000001518	-	GL831385.1:598159-608010	q1	q2	NOTEST	0	0	0	0	1	1	no
ENSONIG00000001519	ENSONIG00000001519	TADA2B	GL831419.1:420965-433701	q1	q2	NOTEST	1.61558	1.27795	-0.338225	0	1	1	no
ENSONIG00000001520	ENSONIG00000001520	SNRNP48	GL831341.1:779580-786758	q1	q2	OK	4.42285	5.0384	0.187989	0.362587	0.5331	0.664483	no
ENSONIG00000001521	ENSONIG00000001521	-	GL831385.1:612775-710383	q1	q2	NOTEST	0.674695	1.61006	1.25481	0	1	1	no
ENSONIG00000001522	ENSONIG00000001522	CCDC96	GL831419.1:420965-433701	q1	q2	NOTEST	0.61443	0.645884	0.0720274	0	1	1	no
ENSONIG00000001523	ENSONIG00000001523	TBC1D14	GL831419.1:474127-514061	q1	q2	OK	3.34665	5.48243	0.712098	1.35227	0.02425	0.0701187	no
ENSONIG00000001524	ENSONIG00000001524	KANK2	GL831149.1:4560785-4567780	q1	q2	NOTEST	1.17917	1.46486	0.31299	0	1	1	no
ENSONIG00000001525	ENSONIG00000001525	MFSD7	GL831156.1:5003383-5021187	q1	q2	OK	6.27111	11.4513	0.868715	2.28859	0.00025	0.00159944	yes
ENSONIG00000001526	ENSONIG00000001526	DOCK6	GL831149.1:4581945-4612551	q1	q2	OK	15.9122	13.9279	-0.19215	-1.2779	0.0274	0.0767908	no
ENSONIG00000001527	ENSONIG00000001527	-	GL831341.1:799980-801780	q1	q2	NOTEST	0	0	0	0	1	1	no
ENSONIG00000001528	ENSONIG00000001528	PRKCE	GL831135.1:9897196-9987190	q1	q2	NOTEST	0.221911	0.386165	0.799234	0	1	1	no
ENSONIG00000001529	ENSONIG00000001529	-	GL831341.1:869867-886560	q1	q2	OK	11.741	14.7331	0.3275	1.47953	0.0082	0.0292015	yes
ENSONIG00000001530	ENSONIG00000001530	KIAA0232	GL831419.1:518645-528855	q1	q2	NOTEST	1.14548	1.15114	0.007112	0	1	1	no
ENSONIG00000001531	ENSONIG00000001531	-	GL831341.1:897977-899759	q1	q2	NOTEST	3.86302	1.79358	-1.10689	0	1	1	no
ENSONIG00000001532	ENSONIG00000001532	PCGF3	GL831156.1:5025510-5087573	q1	q2	NOTEST	1.08226	2.0202	0.900451	0	1	1	no
ENSONIG00000001533	ENSONIG00000001533	-	GL831341.1:905789-907648	q1	q2	NOTEST	3.86098	1.33819	-1.52869	0	1	1	no
ENSONIG00000001534	ENSONIG00000001534	ISG20L2	GL831341.1:919321-929277	q1	q2	NOTEST	1.87638	1.8403	-0.0280091	0	1	1	no
ENSONIG00000001535	ENSONIG00000001535	S100P (2 of 2)	GL831419.1:547532-548631	q1	q2	NOTEST	3.97268	0.579975	-2.77605	0	1	1	no
ENSONIG00000001536	ENSONIG00000001536	S100P (1 of 2)	GL831419.1:548786-549934	q1	q2	NOTEST	0	0	0	0	1	1	no
ENSONIG00000001537	ENSONIG00000001537	RRNAD1	GL831341.1:919321-929277	q1	q2	NOTEST	1.383	0.680131	-1.02391	0	1	1	no
ENSONIG00000001538	ENSONIG00000001538	ELAVL3	GL831149.1:4627692-4632875	q1	q2	NOTEST	0.660803	1.0462	0.662862	0	1	1	no
ENSONIG00000001539	ENSONIG00000001539	CPLX1 (2 of 2)	GL831156.1:5218697-5224993	q1	q2	OK	11.9346	8.09903	-0.559332	-0.538298	0.4011	0.545056	no
ENSONIG00000001540	ENSONIG00000001540	SLC29A2 (1 of 2)	GL831419.1:598776-611498	q1	q2	OK	37.3514	31.4017	-0.250321	-1.81928	0.0017	0.00818629	yes
ENSONIG00000001541	ENSONIG00000001541	SMU1	GL831156.1:5379152-5388303	q1	q2	OK	6.6062	4.25659	-0.634121	-1.73829	0.00325	0.0138948	yes
ENSONIG00000001542	ENSONIG00000001542	PRKCSH	GL831149.1:4639766-4644231	q1	q2	OK	47.3738	44.2915	-0.0970576	-0.603654	0.29565	0.441125	no
ENSONIG00000001543	ENSONIG00000001543	BCAN (1 of 2)	GL831341.1:941327-968612	q1	q2	NOTEST	0.245912	0.449292	0.86951	0	1	1	no
ENSONIG00000001544	ENSONIG00000001544	-	GL831419.1:613677-621182	q1	q2	OK	18.705	24.1157	0.366552	1.38749	0.01705	0.052978	no
ENSONIG00000001545	ENSONIG00000001545	RELA	GL831419.1:641269-651271	q1	q2	OK	17.5874	16.5488	-0.0878146	-0.343763	0.54935	0.678488	no
ENSONIG00000001546	ENSONIG00000001546	DRAP1	GL831419.1:654563-660882	q1	q2	OK	9.94919	2.6969	-1.88328	-1.60569	0.04615	0.113908	no
ENSONIG00000001547	ENSONIG00000001547	HAPLN2	GL831341.1:971729-976703	q1	q2	NOTEST	0	0	0	0	1	1	no
ENSONIG00000001548	ENSONIG00000001548	-	GL831149.1:4645296-4693310	q1	q2	OK	3.51737	5.0495	0.521646	1.59351	0.00525	0.0205587	yes
ENSONIG00000001549	ENSONIG00000001549	CPXM1 (1 of 2)	GL831156.1:5388591-5415791	q1	q2	NOTEST	0.686224	0.640587	-0.099286	0	1	1	no
ENSONIG00000001550	ENSONIG00000001550	RHBG	GL831341.1:988692-999039	q1	q2	NOTEST	0.269421	0	#NAME?	0	1	1	no
ENSONIG00000001551	ENSONIG00000001551	MAP3K11	GL831419.1:666283-708447	q1	q2	NOTEST	0.0592063	0	#NAME?	0	1	1	no
ENSONIG00000001552	ENSONIG00000001552	ATRNL1 (1 of 2)	GL831135.1:9999068-10201266	q1	q2	NOTEST	0.218852	0.13071	-0.743583	0	1	1	no
ENSONIG00000001553	ENSONIG00000001553	DEK	GL831385.1:719474-724854	q1	q2	OK	6.4105	4.0884	-0.648901	-0.933131	0.10205	0.207163	no
ENSONIG00000001554	ENSONIG00000001554	MEF2D (2 of 2)	GL831341.1:1118172-1178520	q1	q2	NOTEST	0.725435	1.94778	1.42491	0	1	1	no
ENSONIG00000001555	ENSONIG00000001555	IKBKAP	GL831156.1:5388591-5415791	q1	q2	OK	10.2155	8.98053	-0.185882	-0.864473	0.13255	0.249359	no
ENSONIG00000001556	ENSONIG00000001556	KCNV1	GL831385.1:731965-737862	q1	q2	NOTEST	0	0	0	0	1	1	no
ENSONIG00000001557	ENSONIG00000001557	-	GL831385.1:783308-795046	q1	q2	NOTEST	1.33542	2.26341	0.761205	0	1	1	no
ENSONIG00000001558	ENSONIG00000001558	GFRA1 (1 of 2)	GL831135.1:10354007-10454431	q1	q2	NOTEST	1.83663	2.1751	0.244016	0	1	1	no
ENSONIG00000001559	ENSONIG00000001559	RAVER1	GL831149.1:4718873-4728779	q1	q2	NOTEST	0.0794543	0	#NAME?	0	1	1	no
ENSONIG00000001560	ENSONIG00000001560	-	GL831341.1:1212863-1215007	q1	q2	NOTEST	0	0	0	0	1	1	no
ENSONIG00000001561	ENSONIG00000001561	TYK2	GL831149.1:4732870-4742119	q1	q2	OK	19.7663	23.3371	0.239583	1.45596	0.01145	0.0385075	yes
ENSONIG00000001562	ENSONIG00000001562	C10ORF96	GL831135.1:10457822-10474840	q1	q2	NOTEST	0	0	0	0	1	1	no
ENSONIG00000001563	ENSONIG00000001563	ANP32E (1 of 2)	GL831385.1:798680-807627	q1	q2	OK	35.8755	37.939	0.0806831	0.562264	0.32465	0.470986	no
ENSONIG00000001564	ENSONIG00000001564	-	GL831135.1:10476969-10483000	q1	q2	NOTEST	0	0	0	0	1	1	no
ENSONIG00000001565	ENSONIG00000001565	PLEKHO1 (1 of 2)	GL831385.1:810442-822289	q1	q2	NOTEST	3.05209	2.72803	-0.16194	0	1	1	no
ENSONIG00000001566	ENSONIG00000001566	-	GL831135.1:11199908-11203543	q1	q2	OK	5.9311	2.29519	-1.36969	-1.24074	0.0529	0.12669	no
ENSONIG00000001567	ENSONIG00000001567	CREB3L4	GL831385.1:825022-829079	q1	q2	OK	12.6632	10.7331	-0.23858	-0.607228	0.29125	0.436944	no
ENSONIG00000001568	ENSONIG00000001568	CDC37	GL831149.1:4745556-4749602	q1	q2	OK	59.6622	80.6681	0.435182	2.52136	5e-05	0.000373456	yes
ENSONIG00000001569	ENSONIG00000001569	TGFBI	GL831156.1:5420566-5441560	q1	q2	NOTEST	0.466449	0.567618	0.283199	0	1	1	no
ENSONIG00000001570	ENSONIG00000001570	-	GL831385.1:832573-835379	q1	q2	OK	3.67069	11.8169	1.68673	2.32777	0.00145	0.00712983	yes
ENSONIG00000001571	ENSONIG00000001571	SLC39A1	GL831385.1:837686-845312	q1	q2	OK	19.415	20.342	0.0672881	0.230218	0.6776	0.784562	no
ENSONIG00000001572	ENSONIG00000001572	-	GL831135.1:11209684-11214121	q1	q2	NOTEST	0.28058	0	#NAME?	0	1	1	no
ENSONIG00000001573	ENSONIG00000001573	-	GL831149.1:4756921-4772407	q1	q2	OK	9.04017	9.18145	0.0223729	0.0651624	0.9173	0.949873	no
ENSONIG00000001574	ENSONIG00000001574	DNMT1 (1 of 2)	GL831149.1:4841570-4854459	q1	q2	NOTEST	0.644593	0.390115	-0.724488	0	1	1	no
ENSONIG00000001575	ENSONIG00000001575	-	GL831135.1:11250426-11252987	q1	q2	NOTEST	1.04719	0.936663	-0.160919	0	1	1	no
ENSONIG00000001576	ENSONIG00000001576	CRTC2	GL831385.1:847152-876654	q1	q2	OK	14.5685	21.1196	0.535736	3.95147	5e-05	0.000373456	yes
ENSONIG00000001577	ENSONIG00000001577	-	GL831135.1:11254409-11259484	q1	q2	OK	15.527	5.68787	-1.44882	-2.20916	0.00165	0.00798219	yes
ENSONIG00000001578	ENSONIG00000001578	KLHDC8B	GL831362.1:136933-303477	q1	q2	NOTEST	0.311455	1.12929	1.85832	0	1	1	no
ENSONIG00000001579	ENSONIG00000001579	USP19	GL831362.1:366725-390533	q1	q2	OK	10.7138	9.8227	-0.125281	-0.708231	0.209	0.345531	no
ENSONIG00000001580	ENSONIG00000001580	SETD4	GL831135.1:11259491-11265940	q1	q2	NOTEST	3.0072	2.46646	-0.285981	0	1	1	no
ENSONIG00000001581	ENSONIG00000001581	CRYZL1	GL831135.1:11266858-11272759	q1	q2	NOTEST	2.46048	0.812869	-1.59785	0	1	1	no
ENSONIG00000001582	ENSONIG00000001582	DENND4B	GL831385.1:877798-904723	q1	q2	NOTEST	2.79808	3.47902	0.314241	0	1	1	no
ENSONIG00000001583	ENSONIG00000001583	EXOSC3	GL831156.1:5447395-5451091	q1	q2	OK	6.5015	4.5923	-0.501555	-1.4292	0.01675	0.0523042	no
ENSONIG00000001584	ENSONIG00000001584	LAMB2	GL831362.1:390543-439111	q1	q2	OK	4.63145	5.97773	0.368134	1.50031	0.00855	0.0302764	yes
ENSONIG00000001585	ENSONIG00000001585	B4GALT1	GL831156.1:5509885-5516984	q1	q2	NOTEST	4.07378	3.24039	-0.330201	0	1	1	no
ENSONIG00000001586	ENSONIG00000001586	ITSN1	GL831135.1:11273682-11321684	q1	q2	NOTEST	0.433249	1.07707	1.31384	0	1	1	no
ENSONIG00000001587	ENSONIG00000001587	ALDH5A1	GL831385.1:914340-916386	q1	q2	NOTEST	3.06852	3.08274	0.00667095	0	1	1	no
ENSONIG00000001588	ENSONIG00000001588	PDXK (2 of 2)	GL831135.1:11336649-11358799	q1	q2	NOTEST	0.619287	0.491849	-0.332392	0	1	1	no
ENSONIG00000001589	ENSONIG00000001589	REST	GL831156.1:5556098-5564558	q1	q2	NOTEST	2.20869	2.14417	-0.0427711	0	1	1	no
ENSONIG00000001590	ENSONIG00000001590	NOA1	GL831156.1:5568235-5573431	q1	q2	OK	9.96964	8.04521	-0.309411	-0.977428	0.088	0.186215	no
ENSONIG00000001591	ENSONIG00000001591	-	GL831149.1:4905825-4906785	q1	q2	NOTEST	0	0	0	0	1	1	no
ENSONIG00000001592	ENSONIG00000001592	EIF3G	GL831149.1:4941031-4944999	q1	q2	OK	140.978	157.626	0.161036	1.16362	0.0451	0.111887	no
ENSONIG00000001593	ENSONIG00000001593	-	GL831897.1:12-4440	q1	q2	NOTEST	0	0	0	0	1	1	no
ENSONIG00000001594	ENSONIG00000001594	-	GL831897.1:44353-45856	q1	q2	NOTEST	0.857464	1.85083	1.11002	0	1	1	no
ENSONIG00000001595	ENSONIG00000001595	NIPSNAP3A	GL831156.1:5573610-5576533	q1	q2	NOTEST	1.27656	1.54166	0.272231	0	1	1	no
ENSONIG00000001596	ENSONIG00000001596	PAX7 (2 of 2)	GL831662.1:22637-112929	q1	q2	NOTEST	0.203065	0.467804	1.20397	0	1	1	no
ENSONIG00000001597	ENSONIG00000001597	-	GL831362.1:441417-494863	q1	q2	NOTEST	0.63611	0.595116	-0.0961051	0	1	1	no
ENSONIG00000001598	ENSONIG00000001598	PPAN	GL831149.1:4949117-4952699	q1	q2	OK	35.4155	38.2256	0.110156	0.564366	0.32895	0.47536	no
ENSONIG00000001599	ENSONIG00000001599	ABCA1 (1 of 2)	GL831156.1:5579389-5619099	q1	q2	NOTEST	1.00546	1.05634	0.0712161	0	1	1	no
ENSONIG00000001600	ENSONIG00000001600	MAP3K7	GL831328.1:209412-237954	q1	q2	OK	5.48192	5.70602	0.0578038	0.182505	0.74085	0.82805	no
ENSONIG00000001601	ENSONIG00000001601	ANGPTL6	GL831149.1:4955242-4959264	q1	q2	NOTEST	0.324178	0.111255	-1.54292	0	1	1	no
ENSONIG00000001602	ENSONIG00000001602	-	GL831149.1:5026859-5031291	q1	q2	NOTEST	0	0	0	0	1	1	no
ENSONIG00000001603	ENSONIG00000001603	-	GL831149.1:5039332-5040659	q1	q2	NOTEST	0	0	0	0	1	1	no
ENSONIG00000001604	ENSONIG00000001604	TRIP10 (1 of 2)	GL831149.1:5048261-5068409	q1	q2	OK	10.8494	12.1465	0.162927	0.743006	0.18775	0.31947	no
ENSONIG00000001605	ENSONIG00000001605	-	GL831362.1:502849-523853	q1	q2	NOTEST	0.0308602	0.0405154	0.392725	0	1	1	no
ENSONIG00000001606	ENSONIG00000001606	BACH2	GL831328.1:308404-340357	q1	q2	NOTEST	0.19749	0.288039	0.544489	0	1	1	no
ENSONIG00000001607	ENSONIG00000001607	MFN2	GL831662.1:155407-182817	q1	q2	OK	8.65438	7.5644	-0.194205	-0.565079	0.32615	0.472182	no
ENSONIG00000001608	ENSONIG00000001608	GJA10 (1 of 2)	GL831328.1:348517-353334	q1	q2	NOTEST	0	0	0	0	1	1	no
ENSONIG00000001609	ENSONIG00000001609	-	GL831328.1:357617-373224	q1	q2	NOTEST	0.897772	0.298926	-1.58656	0	1	1	no
ENSONIG00000001610	ENSONIG00000001610	MDN1	GL831328.1:373266-424685	q1	q2	NOTEST	2.20406	2.77809	0.333931	0	1	1	no
ENSONIG00000001611	ENSONIG00000001611	TNNC2 (2 of 2)	GL831362.1:538017-544902	q1	q2	NOTEST	0.578736	0	#NAME?	0	1	1	no
ENSONIG00000001612	ENSONIG00000001612	TNNC2 (1 of 2)	GL831362.1:546830-549605	q1	q2	OK	3.3711	5.28948	0.649907	0.430863	0.43035	0.572314	no
ENSONIG00000001613	ENSONIG00000001613	OLFM2 (1 of 2)	GL831149.1:5124494-5155043	q1	q2	OK	7.57226	3.43839	-1.13899	-2.31835	0.00045	0.00267238	yes
ENSONIG00000001614	ENSONIG00000001614	COL5A3 (1 of 2)	GL831149.1:5191405-5237228	q1	q2	NOTEST	2.44633	2.24114	-0.126382	0	1	1	no
ENSONIG00000001615	ENSONIG00000001615	COL20A1	GL831362.1:554251-600327	q1	q2	NOTEST	0.892142	0.826408	-0.110419	0	1	1	no
ENSONIG00000001616	ENSONIG00000001616	ANKRD6	GL831328.1:435336-477762	q1	q2	OK	4.99949	4.38291	-0.189891	-0.680279	0.2401	0.383441	no
ENSONIG00000001617	ENSONIG00000001617	PLAGL2 (2 of 2)	GL831662.1:191398-192703	q1	q2	NOTEST	0.989805	0.300966	-1.71754	0	1	1	no
ENSONIG00000001618	ENSONIG00000001618	-	GL832102.1:7411-8225	q1	q2	NOTEST	0	0	0	0	1	1	no
ENSONIG00000001619	ENSONIG00000001619	DPM1	GL831362.1:610088-616549	q1	q2	OK	14.816	13.1441	-0.172739	-0.618185	0.2925	0.437984	no
ENSONIG00000001620	ENSONIG00000001620	ZNF292 (1 of 2)	GL831328.1:531284-549024	q1	q2	NOTEST	2.28835	2.14726	-0.0918097	0	1	1	no
ENSONIG00000001621	ENSONIG00000001621	-	GL831804.1:50948-52410	q1	q2	NOTEST	0	0	0	0	1	1	no
ENSONIG00000001622	ENSONIG00000001622	-	GL831804.1:90282-97376	q1	q2	NOTEST	2.4831	3.4086	0.457034	0	1	1	no
ENSONIG00000001623	ENSONIG00000001623	ADNP (1 of 2)	GL831362.1:617593-629537	q1	q2	NOTEST	4.16247	3.03956	-0.453576	0	1	1	no
ENSONIG00000001624	ENSONIG00000001624	GJB7	GL831328.1:551559-554457	q1	q2	NOTEST	0	0	0	0	1	1	no
ENSONIG00000001625	ENSONIG00000001625	PARD6B	GL831362.1:641957-659683	q1	q2	NOTEST	3.91281	2.72843	-0.520137	0	1	1	no
ENSONIG00000001626	ENSONIG00000001626	C6ORF162	GL831328.1:557868-558758	q1	q2	OK	29.634	23.3476	-0.343982	-0.391932	0.5153	0.650288	no
ENSONIG00000001627	ENSONIG00000001627	DDX51	GL831328.1:559950-565458	q1	q2	OK	9.91983	9.57395	-0.0512001	-0.152853	0.79125	0.865543	no
ENSONIG00000001628	ENSONIG00000001628	ARFGEF2	GL831362.1:663111-687186	q1	q2	OK	4.77825	5.2583	0.138114	0.49857	0.37305	0.518822	no
ENSONIG00000001629	ENSONIG00000001629	TILRAD51	GL831328.1:599138-606559	q1	q2	NOTEST	0	0	0	0	1	1	no
ENSONIG00000001630	ENSONIG00000001630	FAM82A2	GL831328.1:607446-616058	q1	q2	OK	4.75499	3.05831	-0.63671	-1.1311	0.05145	0.124068	no
ENSONIG00000001631	ENSONIG00000001631	SLC44A1 (2 of 2)	GL831156.1:5633323-5654133	q1	q2	NOTEST	0.928114	0.440006	-1.07678	0	1	1	no
ENSONIG00000001632	ENSONIG00000001632	BCL2L1 (1 of 2)	GL831362.1:693487-719018	q1	q2	OK	9.59315	13.556	0.498856	0.850603	0.14575	0.266228	no
ENSONIG00000001633	ENSONIG00000001633	COX4I2	GL831362.1:724479-727584	q1	q2	OK	38.8318	42.7092	0.137309	0.811772	0.15475	0.277509	no
ENSONIG00000001634	ENSONIG00000001634	-	GL831328.1:626762-634974	q1	q2	NOTEST	0.217673	0.257939	0.244872	0	1	1	no
ENSONIG00000001635	ENSONIG00000001635	C6ORF165	GL831328.1:637675-650996	q1	q2	NOTEST	0.0835559	0.17501	1.06663	0	1	1	no
ENSONIG00000001636	ENSONIG00000001636	FAM110A (1 of 2)	GL831362.1:783121-784504	q1	q2	NOTEST	1.48002	2.1642	0.548214	0	1	1	no
ENSONIG00000001637	ENSONIG00000001637	NSFL1C	GL831362.1:851418-864041	q1	q2	OK	14.5888	12.7474	-0.194657	-0.429269	0.45555	0.594882	no
ENSONIG00000001638	ENSONIG00000001638	KCNK10 (2 of 2)	GL831328.1:652324-685509	q1	q2	NOTEST	0	0	0	0	1	1	no
ENSONIG00000001639	ENSONIG00000001639	-	GL831328.1:708395-722693	q1	q2	NOTEST	0	0	0	0	1	1	no
ENSONIG00000001640	ENSONIG00000001640	-	GL831362.1:864594-874895	q1	q2	NOTEST	1.18273	0.666221	-0.828048	0	1	1	no
ENSONIG00000001641	ENSONIG00000001641	SDCBP2	GL831362.1:894733-917445	q1	q2	OK	133.535	187.739	0.491514	3.70273	5e-05	0.000373456	yes
ENSONIG00000001642	ENSONIG00000001642	RDH8 (1 of 2)	GL831149.1:5247121-5252387	q1	q2	OK	4.83186	2.59815	-0.895095	-1.13376	0.05695	0.133791	no
ENSONIG00000001643	ENSONIG00000001643	SNPH (1 of 2)	GL831362.1:925384-929034	q1	q2	OK	5.56247	10.0758	0.857097	1.79296	0.0035	0.0148026	yes
ENSONIG00000001644	ENSONIG00000001644	-	GL831362.1:952692-954293	q1	q2	NOTEST	1.95947	1.00321	-0.965849	0	1	1	no
ENSONIG00000001645	ENSONIG00000001645	NOTCH3	GL831149.1:5285204-5313571	q1	q2	NOTEST	3.5857	3.14687	-0.188336	0	1	1	no
ENSONIG00000001646	ENSONIG00000001646	-	GL831592.1:3120-4684	q1	q2	NOTEST	0	0.11852	inf	0	1	1	no
ENSONIG00000001647	ENSONIG00000001647	-	GL831592.1:147986-149838	q1	q2	NOTEST	0	0	0	0	1	1	no
ENSONIG00000001648	ENSONIG00000001648	STXBP6	GL831328.1:755018-774965	q1	q2	NOTEST	0.0842558	0.0849025	0.0110313	0	1	1	no
ENSONIG00000001649	ENSONIG00000001649	-	GL831592.1:169781-171312	q1	q2	NOTEST	0.35105	0.282882	-0.311477	0	1	1	no
ENSONIG00000001650	ENSONIG00000001650	-	GL831592.1:183850-191176	q1	q2	NOTEST	0.300142	0.436061	0.538885	0	1	1	no
ENSONIG00000001651	ENSONIG00000001651	-	GL831592.1:281214-289062	q1	q2	NOTEST	1.19293	0.911061	-0.38889	0	1	1	no
ENSONIG00000001652	ENSONIG00000001652	DDHD1 (2 of 2)	GL831328.1:802498-840877	q1	q2	NOTEST	0.77348	0.696735	-0.150753	0	1	1	no
ENSONIG00000001653	ENSONIG00000001653	CLCC1	GL831140.1:28556-32500	q1	q2	NOTEST	1.8116	1.38194	-0.390563	0	1	1	no
ENSONIG00000001654	ENSONIG00000001654	FTSJ3	GL831140.1:33670-41126	q1	q2	OK	20.4565	19.6558	-0.057602	-0.296427	0.6071	0.727387	no
ENSONIG00000001655	ENSONIG00000001655	CGRRF1	GL831328.1:846449-857061	q1	q2	OK	5.69066	5.18379	-0.134589	-0.447901	0.44085	0.581482	no
ENSONIG00000001656	ENSONIG00000001656	AGL	GL831546.1:39086-100480	q1	q2	OK	6.07015	6.12176	0.0122138	0.050691	0.9383	0.963369	no
ENSONIG00000001657	ENSONIG00000001657	PSMC6	GL831328.1:857155-864700	q1	q2	OK	16.0184	25.4687	0.668997	2.53267	5e-05	0.000373456	yes
ENSONIG00000001658	ENSONIG00000001658	HRASLS	GL831140.1:46189-50120	q1	q2	NOTEST	0.469038	0	#NAME?	0	1	1	no
ENSONIG00000001659	ENSONIG00000001659	MFN1 (1 of 2)	GL831140.1:67398-80172	q1	q2	OK	11.8079	9.69899	-0.28385	-1.09577	0.06	0.139497	no
ENSONIG00000001660	ENSONIG00000001660	-	GL831546.1:104833-140505	q1	q2	NOTEST	0.0670845	0.181964	1.4396	0	1	1	no
ENSONIG00000001661	ENSONIG00000001661	NUS1	GL831328.1:872285-880592	q1	q2	OK	12.4989	9.93798	-0.330779	-0.94021	0.10865	0.215893	no
ENSONIG00000001662	ENSONIG00000001662	LAS1L (3 of 5)	GL831166.1:4038-5064	q1	q2	NOTEST	0.376017	0	#NAME?	0	1	1	no
ENSONIG00000001663	ENSONIG00000001663	RAD54L2 (1 of 2)	GL831166.1:46925-76369	q1	q2	NOTEST	1.88098	3.37231	0.842255	0	1	1	no
ENSONIG00000001664	ENSONIG00000001664	SLC35F1	GL831328.1:881845-904847	q1	q2	NOTEST	1.39774	0.254516	-2.45726	0	1	1	no
ENSONIG00000001665	ENSONIG00000001665	BRF1 (2 of 3)	GL831232.1:8911-115850	q1	q2	NOTEST	0.902879	1.1463	0.344378	0	1	1	no
ENSONIG00000001666	ENSONIG00000001666	SERINC1	GL831328.1:907627-917114	q1	q2	OK	89.1665	84.7354	-0.0735358	-0.82624	0.1533	0.275695	no
ENSONIG00000001667	ENSONIG00000001667	-	GL831149.1:5314034-5315691	q1	q2	NOTEST	1.24343	0	#NAME?	0	1	1	no
ENSONIG00000001668	ENSONIG00000001668	RNF2	GL831546.1:184428-202013	q1	q2	OK	9.47207	11.0862	0.22702	1.19016	0.03885	0.100134	no
ENSONIG00000001669	ENSONIG00000001669	TMEM115	GL831166.1:88962-99018	q1	q2	OK	5.03894	4.90097	-0.0400522	-0.0984143	0.8406	0.898612	no
ENSONIG00000001670	ENSONIG00000001670	-	GL831166.1:99620-111837	q1	q2	OK	12.6263	20.6856	0.712199	2.06756	0.00085	0.00456503	yes
ENSONIG00000001671	ENSONIG00000001671	GNB4	GL831140.1:85905-98430	q1	q2	OK	8.51413	6.09885	-0.481321	-1.30036	0.0258	0.073619	no
ENSONIG00000001672	ENSONIG00000001672	BTBD6 (1 of 2)	GL831232.1:8911-115850	q1	q2	OK	11.137	9.79625	-0.18506	-0.486182	0.3943	0.538141	no
ENSONIG00000001673	ENSONIG00000001673	-	GL831149.1:5320175-5321676	q1	q2	OK	6.86375	5.89926	-0.218464	-0.250753	0.69755	0.798779	no
ENSONIG00000001674	ENSONIG00000001674	ARPC5 (2 of 2)	GL831546.1:202259-210530	q1	q2	OK	42.225	49.51	0.229622	1.35836	0.01975	0.0596866	no
ENSONIG00000001675	ENSONIG00000001675	-	GL831166.1:123317-171848	q1	q2	NOTEST	0.068502	0.144277	1.07462	0	1	1	no
ENSONIG00000001676	ENSONIG00000001676	JAG2 (1 of 2)	GL831232.1:304435-355927	q1	q2	OK	9.67297	17.4181	0.848557	5.57859	5e-05	0.000373456	yes
ENSONIG00000001677	ENSONIG00000001677	HSF2	GL831328.1:921189-937312	q1	q2	NOTEST	0.550733	1.38445	1.32988	0	1	1	no
ENSONIG00000001678	ENSONIG00000001678	ACTL6A	GL831140.1:112526-175699	q1	q2	OK	5.32563	4.44179	-0.261813	-0.682853	0.23345	0.375971	no
ENSONIG00000001679	ENSONIG00000001679	-	GL831166.1:195241-215001	q1	q2	NOTEST	0	0	0	0	1	1	no
ENSONIG00000001680	ENSONIG00000001680	-	GL832585.1:679-5861	q1	q2	NOTEST	0	0	0	0	1	1	no
ENSONIG00000001681	ENSONIG00000001681	MCM9	GL831328.1:1109105-1141905	q1	q2	NOTEST	0.116263	0.0481213	-1.27265	0	1	1	no
ENSONIG00000001682	ENSONIG00000001682	-	AERX01076373.2:20-1308	q1	q2	NOTEST	1.68987	0.310129	-2.44597	0	1	1	no
ENSONIG00000001683	ENSONIG00000001683	MRPL47	GL831140.1:112526-175699	q1	q2	NOTEST	2.7658	1.74961	-0.66066	0	1	1	no
ENSONIG00000001684	ENSONIG00000001684	CEP85L	GL831328.1:1178082-1197016	q1	q2	NOTEST	1.31683	0.718134	-0.874748	0	1	1	no
ENSONIG00000001685	ENSONIG00000001685	XPC	GL831166.1:275092-287093	q1	q2	NOTEST	3.53067	3.30468	-0.0954353	0	1	1	no
ENSONIG00000001686	ENSONIG00000001686	-	GL831149.1:5323358-5327510	q1	q2	NOTEST	0.908645	1.00917	0.151383	0	1	1	no
ENSONIG00000001687	ENSONIG00000001687	NDUFB5	GL831140.1:112526-175699	q1	q2	OK	18.7832	17.7164	-0.084361	-0.106878	0.84835	0.902601	no
ENSONIG00000001688	ENSONIG00000001688	GOPC	GL831328.1:1201842-1220323	q1	q2	OK	18.2629	22.2681	0.28606	0.97583	0.0933	0.194421	no
ENSONIG00000001689	ENSONIG00000001689	UBE2J1	GL831328.1:1234472-1260739	q1	q2	OK	6.86396	10.4605	0.607839	1.10491	0.0568	0.133588	no
ENSONIG00000001690	ENSONIG00000001690	CAMSAP3	GL831149.1:5329305-5352277	q1	q2	NOTEST	3.45635	4.26946	0.304804	0	1	1	no
ENSONIG00000001691	ENSONIG00000001691	GABRR2 (1 of 2)	GL831328.1:1265893-1285345	q1	q2	NOTEST	2.12922	2.25556	0.0831569	0	1	1	no
ENSONIG00000001692	ENSONIG00000001692	USP13	GL831140.1:177089-213170	q1	q2	OK	5.89786	5.95637	0.0142415	0.0363212	0.9551	0.969749	no
ENSONIG00000001693	ENSONIG00000001693	ARIH2	GL831166.1:293401-302921	q1	q2	OK	9.75261	8.49526	-0.199131	-0.48966	0.39185	0.53596	no
ENSONIG00000001694	ENSONIG00000001694	RECQL	GL831328.1:1302131-1312595	q1	q2	NOTEST	1.13238	1.46433	0.370886	0	1	1	no
ENSONIG00000001695	ENSONIG00000001695	XAB2	GL831149.1:5353635-5361107	q1	q2	OK	5.86601	4.38548	-0.419645	-1.30639	0.02665	0.0754284	no
ENSONIG00000001696	ENSONIG00000001696	IMPDH2	GL831166.1:307884-325822	q1	q2	OK	12.2022	11.9492	-0.03023	-0.105547	0.8479	0.90258	no
ENSONIG00000001697	ENSONIG00000001697	GOLT1B (1 of 2)	GL831328.1:1317802-1325483	q1	q2	OK	15.8334	8.19494	-0.950163	-0.964081	0.09195	0.192373	no
ENSONIG00000001698	ENSONIG00000001698	GYS2	GL831328.1:1337843-1351456	q1	q2	NOTEST	0	0.0754912	inf	0	1	1	no
ENSONIG00000001699	ENSONIG00000001699	DALRD3	GL831166.1:339440-347006	q1	q2	NOTEST	2.09633	1.98545	-0.0784056	0	1	1	no
ENSONIG00000001700	ENSONIG00000001700	PEX5L (1 of 2)	GL831140.1:221455-277442	q1	q2	NOTEST	0.188721	0.0861783	-1.13086	0	1	1	no
ENSONIG00000001701	ENSONIG00000001701	CELSR3	GL831166.1:387454-501904	q1	q2	NOTEST	1.20657	1.22076	0.0168697	0	1	1	no
ENSONIG00000001702	ENSONIG00000001702	-	GL831149.1:5363874-5374552	q1	q2	NOTEST	0	0	0	0	1	1	no
ENSONIG00000001703	ENSONIG00000001703	ABR	GL831223.1:6073-79927	q1	q2	OK	24.571	30.1311	0.294299	1.68707	0.00405	0.0167239	yes
ENSONIG00000001704	ENSONIG00000001704	KISS2	GL831328.1:1353903-1355714	q1	q2	NOTEST	1.53999	0.374358	-2.04043	0	1	1	no
ENSONIG00000001705	ENSONIG00000001705	LDHB (1 of 2)	GL831328.1:1356076-1366470	q1	q2	OK	67	80.5879	0.266401	3.22014	5e-05	0.000373456	yes
ENSONIG00000001706	ENSONIG00000001706	GP5	GL831140.1:396224-400385	q1	q2	NOTEST	0.283701	0.125331	-1.17862	0	1	1	no
ENSONIG00000001707	ENSONIG00000001707	UTS2D	GL831140.1:401917-403185	q1	q2	NOTEST	0.486284	0	#NAME?	0	1	1	no
ENSONIG00000001708	ENSONIG00000001708	CCDC50	GL831140.1:406493-423319	q1	q2	OK	6.96028	6.57651	-0.0818235	-0.199563	0.72545	0.81792	no
ENSONIG00000001709	ENSONIG00000001709	-	GL831140.1:433808-434800	q1	q2	NOTEST	0.407559	0	#NAME?	0	1	1	no
ENSONIG00000001710	ENSONIG00000001710	ESR2 (1 of 2)	GL831232.1:519071-548925	q1	q2	NOTEST	0.674785	1.02876	0.608406	0	1	1	no
ENSONIG00000001711	ENSONIG00000001711	-	GL831140.1:440621-442850	q1	q2	NOTEST	0	0.0914246	inf	0	1	1	no
ENSONIG00000001712	ENSONIG00000001712	SLC25A3	GL831328.1:1374849-1381018	q1	q2	OK	213.623	248.253	0.216748	2.26743	0.00025	0.00159944	yes
ENSONIG00000001713	ENSONIG00000001713	ASPA	GL831223.1:124511-135033	q1	q2	NOTEST	1.74151	0.765076	-1.18667	0	1	1	no
ENSONIG00000001714	ENSONIG00000001714	LEPREL1	GL831140.1:445209-495059	q1	q2	NOTEST	1.79788	1.68496	-0.0935843	0	1	1	no
ENSONIG00000001715	ENSONIG00000001715	C11ORF54	GL831223.1:174076-176851	q1	q2	NOTEST	0.717321	0.466963	-0.619311	0	1	1	no
ENSONIG00000001716	ENSONIG00000001716	WDR6	GL831166.1:512008-517808	q1	q2	NOTEST	1.80788	0.801043	-1.17435	0	1	1	no
ENSONIG00000001717	ENSONIG00000001717	AKAP10	GL831223.1:177562-194834	q1	q2	NOTEST	3.12667	2.99289	-0.06309	0	1	1	no
ENSONIG00000001718	ENSONIG00000001718	SLC26A6 (1 of 3)	GL831166.1:551326-570701	q1	q2	NOTEST	0	0	0	0	1	1	no
ENSONIG00000001719	ENSONIG00000001719	AK7 (1 of 2)	GL831432.1:23601-46963	q1	q2	OK	9.89872	9.58768	-0.0460602	-0.14174	0.80455	0.873738	no
ENSONIG00000001720	ENSONIG00000001720	C1ORF114	GL831140.1:445209-495059	q1	q2	NOTEST	0.870769	0.0836816	-3.37931	0	1	1	no
ENSONIG00000001721	ENSONIG00000001721	CPOX	GL831140.1:502187-507200	q1	q2	OK	11.1282	9.02367	-0.302437	-0.952958	0.1043	0.210103	no
ENSONIG00000001722	ENSONIG00000001722	-	GL831232.1:552988-674318	q1	q2	NOTEST	0.0156161	0.0398571	1.3518	0	1	1	no
ENSONIG00000001723	ENSONIG00000001723	SPATA22	GL831223.1:302593-310553	q1	q2	NOTEST	0.0231381	0	#NAME?	0	1	1	no
ENSONIG00000001724	ENSONIG00000001724	PRRG1	GL831140.1:509021-511467	q1	q2	OK	8.41039	7.80811	-0.107198	-0.135195	0.8107	0.878512	no
ENSONIG00000001725	ENSONIG00000001725	STIP1	GL831223.1:316111-320015	q1	q2	OK	95.9402	131.754	0.457639	4.13067	5e-05	0.000373456	yes
ENSONIG00000001726	ENSONIG00000001726	TMEM47 (1 of 2)	GL831140.1:517125-521710	q1	q2	NOTEST	0	0	0	0	1	1	no
ENSONIG00000001727	ENSONIG00000001727	-	GL831432.1:79373-117129	q1	q2	OK	3.15162	4.93714	0.647582	0.77792	0.247	0.389905	no
ENSONIG00000001728	ENSONIG00000001728	TAB3	GL831140.1:522578-532045	q1	q2	OK	4.81147	2.28159	-1.07644	-2.09001	0.0004	0.00240497	yes
ENSONIG00000001729	ENSONIG00000001729	SLC3A2 (1 of 3)	GL831432.1:119383-125936	q1	q2	NOTEST	3.78167	2.32101	-0.704271	0	1	1	no
ENSONIG00000001730	ENSONIG00000001730	NEXN	GL831140.1:537144-546223	q1	q2	NOTEST	0	0	0	0	1	1	no
ENSONIG00000001731	ENSONIG00000001731	RPS6KA4	GL831223.1:321580-333435	q1	q2	NOTEST	2.28207	2.74052	0.264106	0	1	1	no
ENSONIG00000001732	ENSONIG00000001732	-	GL831149.1:5403889-5407863	q1	q2	NOTEST	0	0	0	0	1	1	no
ENSONIG00000001733	ENSONIG00000001733	MDGA2 (2 of 2)	GL831432.1:299282-491593	q1	q2	NOTEST	2.31316	1.51222	-0.613192	0	1	1	no
ENSONIG00000001734	ENSONIG00000001734	FAM188B	GL831140.1:552190-562053	q1	q2	NOTEST	3.31932	2.82742	-0.231399	0	1	1	no
ENSONIG00000001735	ENSONIG00000001735	-	GL831149.1:5412127-5414877	q1	q2	NOTEST	0	0	0	0	1	1	no
ENSONIG00000001736	ENSONIG00000001736	-	GL831149.1:5427711-5430755	q1	q2	NOTEST	0	0	0	0	1	1	no
ENSONIG00000001737	ENSONIG00000001737	-	GL831149.1:5435994-5438828	q1	q2	NOTEST	0	0	0	0	1	1	no
ENSONIG00000001738	ENSONIG00000001738	ZFPL1	GL831223.1:425081-430273	q1	q2	OK	23.779	21.4454	-0.149018	-0.74241	0.18965	0.322267	no
ENSONIG00000001739	ENSONIG00000001739	-	GL831149.1:5559431-5570033	q1	q2	NOTEST	0	0	0	0	1	1	no
ENSONIG00000001740	ENSONIG00000001740	FAM150A	GL831140.1:566894-575073	q1	q2	NOTEST	0.17061	0	#NAME?	0	1	1	no
ENSONIG00000001741	ENSONIG00000001741	IQCA1	GL831140.1:576716-584448	q1	q2	NOTEST	0.0776124	0	#NAME?	0	1	1	no
ENSONIG00000001742	ENSONIG00000001742	ROM1 (1 of 2)	GL831223.1:444222-448135	q1	q2	NOTEST	0	0	0	0	1	1	no
ENSONIG00000001743	ENSONIG00000001743	DHRS13 (3 of 3)	GL831432.1:519642-524543	q1	q2	NOTEST	0.62317	0.898277	0.527533	0	1	1	no
ENSONIG00000001744	ENSONIG00000001744	FRMD8	GL831223.1:451852-462612	q1	q2	OK	8.13506	10.3087	0.341641	1.36315	0.0146	0.0469184	yes
ENSONIG00000001745	ENSONIG00000001745	-	GL831140.1:590670-605447	q1	q2	NOTEST	0	0	0	0	1	1	no
ENSONIG00000001746	ENSONIG00000001746	-	GL831232.1:692842-697669	q1	q2	NOTEST	0	0	0	0	1	1	no
ENSONIG00000001747	ENSONIG00000001747	-	GL831140.1:611077-626000	q1	q2	NOTEST	0.149382	0.507006	1.763	0	1	1	no
ENSONIG00000001748	ENSONIG00000001748	KCNH5 (1 of 2)	GL831232.1:718103-899474	q1	q2	NOTEST	0.0453515	0.0616845	0.443758	0	1	1	no
ENSONIG00000001749	ENSONIG00000001749	PIK3R1 (1 of 2)	GL831432.1:602718-624052	q1	q2	OK	13.0883	13.7097	0.0669258	0.25049	0.65825	0.768896	no
ENSONIG00000001750	ENSONIG00000001750	GUK1 (1 of 2)	GL831140.1:627027-631870	q1	q2	NOTEST	0	0	0	0	1	1	no
ENSONIG00000001751	ENSONIG00000001751	C11ORF2	GL831223.1:462810-469799	q1	q2	OK	5.21856	3.71484	-0.490352	-1.36726	0.02265	0.0662231	no
ENSONIG00000001752	ENSONIG00000001752	PPP2R5E	GL831232.1:920243-961481	q1	q2	OK	9.32237	6.9717	-0.419187	-1.70324	0.00425	0.0173899	yes
ENSONIG00000001753	ENSONIG00000001753	RNF220 (2 of 2)	GL831140.1:633282-661278	q1	q2	NOTEST	0	0	0	0	1	1	no
ENSONIG00000001754	ENSONIG00000001754	TM7SF2	GL831223.1:470850-479747	q1	q2	NOTEST	0.419589	0.129668	-1.69416	0	1	1	no
ENSONIG00000001755	ENSONIG00000001755	CNIH2	GL831223.1:489059-499441	q1	q2	NOTEST	0	0	0	0	1	1	no
ENSONIG00000001756	ENSONIG00000001756	DMAP1	GL831140.1:682570-687824	q1	q2	OK	8.53047	5.67594	-0.587766	-1.64335	0.0048	0.01913	yes
ENSONIG00000001757	ENSONIG00000001757	-	GL831223.1:517471-540599	q1	q2	NOTEST	0.161129	0.203081	0.333841	0	1	1	no
ENSONIG00000001758	ENSONIG00000001758	HNRNPM	GL831140.1:687842-695286	q1	q2	OK	15.2411	12.6103	-0.273365	-0.981599	0.08745	0.185363	no
ENSONIG00000001759	ENSONIG00000001759	MGLL	GL831166.1:575580-606072	q1	q2	NOTEST	0.233549	0	#NAME?	0	1	1	no
ENSONIG00000001760	ENSONIG00000001760	PRKAR2A (1 of 2)	GL831166.1:617399-658763	q1	q2	OK	7.19383	5.0198	-0.51913	-0.886826	0.1326	0.249378	no
ENSONIG00000001761	ENSONIG00000001761	-	GL831432.1:647905-662204	q1	q2	OK	102.91	106.156	0.0448083	0.455686	0.42445	0.566985	no
ENSONIG00000001762	ENSONIG00000001762	-	GL831223.1:565934-571186	q1	q2	NOTEST	0	0	0	0	1	1	no
ENSONIG00000001763	ENSONIG00000001763	SGPP1 (1 of 2)	GL831232.1:982339-1010505	q1	q2	NOTEST	1.81381	1.38016	-0.394188	0	1	1	no
ENSONIG00000001764	ENSONIG00000001764	SYT16	GL831232.1:1025587-1058884	q1	q2	NOTEST	1.34429	1.80453	0.424771	0	1	1	no
ENSONIG00000001765	ENSONIG00000001765	SNAPC1 (1 of 2)	GL831232.1:1059215-1063791	q1	q2	NOTEST	1.69203	1.23726	-0.451607	0	1	1	no
ENSONIG00000001766	ENSONIG00000001766	GNG3	GL831223.1:584837-587283	q1	q2	OK	15.5406	11.9137	-0.383424	-0.236006	0.71585	0.811126	no
ENSONIG00000001767	ENSONIG00000001767	BANF1	GL831223.1:590212-590905	q1	q2	OK	5.73281	5.3458	-0.100836	-0.0409546	0.89465	0.935199	no
ENSONIG00000001768	ENSONIG00000001768	PRDX5	GL831223.1:592308-594761	q1	q2	OK	45.6334	48.9306	0.100646	0.315688	0.57935	0.704609	no
ENSONIG00000001769	ENSONIG00000001769	NAT6	GL831166.1:664570-665380	q1	q2	NOTEST	0	0.778084	inf	0	1	1	no
ENSONIG00000001770	ENSONIG00000001770	-	GL832206.1:7107-8117	q1	q2	NOTEST	0	0	0	0	1	1	no
ENSONIG00000001771	ENSONIG00000001771	HYAL3	GL831166.1:667250-669157	q1	q2	NOTEST	0.153621	0.284403	0.888563	0	1	1	no
ENSONIG00000001772	ENSONIG00000001772	TIMM44 (1 of 2)	GL831140.1:696148-702635	q1	q2	OK	5.13154	3.88668	-0.400853	-0.656398	0.27075	0.415203	no
ENSONIG00000001773	ENSONIG00000001773	YIPF6	GL831232.1:1065031-1068929	q1	q2	OK	24.6643	20.6253	-0.258011	-1.50287	0.009	0.031656	yes
ENSONIG00000001774	ENSONIG00000001774	-	AERX01073953.1:1353-3202	q1	q2	NOTEST	2.38932	2.73097	0.19281	0	1	1	no
ENSONIG00000001775	ENSONIG00000001775	-	GL831232.1:1074496-1078962	q1	q2	NOTEST	1.58714	0.536629	-1.56443	0	1	1	no
ENSONIG00000001776	ENSONIG00000001776	C14ORF126	GL831232.1:1095921-1099354	q1	q2	NOTEST	0.063111	0.196279	1.63694	0	1	1	no
ENSONIG00000001777	ENSONIG00000001777	FBN3	GL831140.1:741461-804368	q1	q2	NOTEST	0.172956	0.251111	0.537923	0	1	1	no
ENSONIG00000001778	ENSONIG00000001778	ESRRA	GL831223.1:609983-626683	q1	q2	OK	3.54165	8.80614	1.31409	2.79262	5e-05	0.000373456	yes
ENSONIG00000001779	ENSONIG00000001779	NUBPL	GL831232.1:1115354-1124470	q1	q2	NOTEST	3.45694	2.26471	-0.610169	0	1	1	no
ENSONIG00000001780	ENSONIG00000001780	CLDND1 (1 of 2)	GL831497.1:39450-45639	q1	q2	NOTEST	2.90561	1.76406	-0.719945	0	1	1	no
ENSONIG00000001781	ENSONIG00000001781	AMT	GL831166.1:675137-681893	q1	q2	NOTEST	0.729174	0	#NAME?	0	1	1	no
ENSONIG00000001782	ENSONIG00000001782	ACY3 (2 of 2)	GL831497.1:49410-52775	q1	q2	NOTEST	0	0	0	0	1	1	no
ENSONIG00000001783	ENSONIG00000001783	KCNK4 (1 of 2)	GL831223.1:632752-640716	q1	q2	NOTEST	0	0	0	0	1	1	no
ENSONIG00000001784	ENSONIG00000001784	OSBP (1 of 2)	GL831497.1:53698-66961	q1	q2	OK	15.5988	16.7312	0.101103	0.462584	0.4096	0.552429	no
ENSONIG00000001785	ENSONIG00000001785	ARHGAP5	GL831232.1:1160493-1212360	q1	q2	NOTEST	3.3835	3.80256	0.168456	0	1	1	no
ENSONIG00000001786	ENSONIG00000001786	IFRD2	GL831166.1:689461-693056	q1	q2	OK	13.2081	12.6769	-0.0592226	-0.161615	0.7803	0.857881	no
ENSONIG00000001787	ENSONIG00000001787	-	GL831223.1:647004-655023	q1	q2	OK	19.4379	17.2373	-0.173341	-0.834293	0.152	0.274298	no
ENSONIG00000001788	ENSONIG00000001788	-	GL831166.1:696284-702574	q1	q2	NOTEST	0.0753722	0.0790138	0.0680724	0	1	1	no
ENSONIG00000001789	ENSONIG00000001789	AKAP6	GL831232.1:1241285-1433737	q1	q2	OK	6.62015	8.46535	0.354707	2.34192	0.0002	0.00131707	yes
ENSONIG00000001790	ENSONIG00000001790	-	GL831497.1:71056-80543	q1	q2	NOTEST	0.665721	0.456383	-0.544671	0	1	1	no
ENSONIG00000001791	ENSONIG00000001791	KIF4A	GL831223.1:665132-683276	q1	q2	NOTEST	0.116572	0.0315906	-1.88365	0	1	1	no
ENSONIG00000001792	ENSONIG00000001792	SEMA3B	GL831166.1:814325-839224	q1	q2	NOTEST	0.95575	0.620915	-0.622238	0	1	1	no
ENSONIG00000001793	ENSONIG00000001793	DTX4 (2 of 2)	GL831497.1:88345-101010	q1	q2	NOTEST	1.0708	0.585631	-0.870628	0	1	1	no
ENSONIG00000001794	ENSONIG00000001794	MSANTD1	GL831497.1:105726-108628	q1	q2	NOTEST	0.332823	0.450045	0.435314	0	1	1	no
ENSONIG00000001795	ENSONIG00000001795	CERS4 (2 of 2)	GL831140.1:842256-854334	q1	q2	NOTEST	1.70796	1.26547	-0.432593	0	1	1	no
ENSONIG00000001796	ENSONIG00000001796	RGS12 (2 of 2)	GL831497.1:111454-153925	q1	q2	NOTEST	2.11043	2.30244	0.125625	0	1	1	no
ENSONIG00000001797	ENSONIG00000001797	HGFAC	GL831497.1:155192-174211	q1	q2	NOTEST	0.30114	0.712966	1.2434	0	1	1	no
ENSONIG00000001798	ENSONIG00000001798	AMMECR1	GL831223.1:690360-700685	q1	q2	NOTEST	0.387352	0.75963	0.971654	0	1	1	no
ENSONIG00000001799	ENSONIG00000001799	NPAS3	GL831232.1:1732017-1787665	q1	q2	NOTEST	0.061376	0.412684	2.74929	0	1	1	no
ENSONIG00000001800	ENSONIG00000001800	-	GL831140.1:857282-859261	q1	q2	NOTEST	0	0	0	0	1	1	no
ENSONIG00000001801	ENSONIG00000001801	LSM7	GL831140.1:859555-861029	q1	q2	OK	13.1217	6.06324	-1.11379	-0.820637	0.1809	0.31195	no
ENSONIG00000001802	ENSONIG00000001802	TMEM164	GL831223.1:716038-735811	q1	q2	NOTEST	1.69848	1.08457	-0.647115	0	1	1	no
ENSONIG00000001803	ENSONIG00000001803	TMPRSS9	GL831140.1:863528-869102	q1	q2	NOTEST	0.128914	0	#NAME?	0	1	1	no
ENSONIG00000001804	ENSONIG00000001804	GABRA3	GL831223.1:756342-823385	q1	q2	NOTEST	0.116175	0.384306	1.72596	0	1	1	no
ENSONIG00000001805	ENSONIG00000001805	-	GL831140.1:869804-873743	q1	q2	NOTEST	0	0	0	0	1	1	no
ENSONIG00000001806	ENSONIG00000001806	TIMM13	GL831140.1:869804-873743	q1	q2	OK	5.5716	3.68728	-0.595534	-1.43003	0.01565	0.0494836	yes
ENSONIG00000001807	ENSONIG00000001807	EGLN3	GL831232.1:1816100-1824699	q1	q2	NOTEST	1.82754	2.68299	0.553935	0	1	1	no
ENSONIG00000001808	ENSONIG00000001808	-	GL831140.1:877587-890778	q1	q2	OK	5.03494	4.76898	-0.0782949	-0.282774	0.6266	0.744369	no
ENSONIG00000001809	ENSONIG00000001809	EAPP	GL831232.1:1843734-1848788	q1	q2	OK	5.02756	4.6695	-0.106591	-0.150068	0.8024	0.872633	no
ENSONIG00000001810	ENSONIG00000001810	-	GL831140.1:908171-920364	q1	q2	NOTEST	0.924136	0.59161	-0.643459	0	1	1	no
ENSONIG00000001811	ENSONIG00000001811	INSR (2 of 2)	GL831140.1:955263-1026089	q1	q2	NOTEST	0.353995	0.458061	0.371813	0	1	1	no
ENSONIG00000001812	ENSONIG00000001812	DOK7 (1 of 2)	GL831497.1:176064-220456	q1	q2	NOTEST	0	0.0264059	inf	0	1	1	no
ENSONIG00000001813	ENSONIG00000001813	GABRQ	GL831223.1:913078-961681	q1	q2	NOTEST	0.488292	0.756723	0.632021	0	1	1	no
ENSONIG00000001814	ENSONIG00000001814	PRKD1	GL831232.1:1964055-2034090	q1	q2	NOTEST	0	0.0353196	inf	0	1	1	no
ENSONIG00000001815	ENSONIG00000001815	-	GL831497.1:290992-294792	q1	q2	NOTEST	0.424915	0.249464	-0.768342	0	1	1	no
ENSONIG00000001816	ENSONIG00000001816	HMX1	GL831497.1:313104-316636	q1	q2	NOTEST	1.446	1.79257	0.309956	0	1	1	no
ENSONIG00000001817	ENSONIG00000001817	-	GL831497.1:317113-319047	q1	q2	NOTEST	0.596022	0.394106	-0.596781	0	1	1	no
ENSONIG00000001818	ENSONIG00000001818	CPZ (1 of 2)	GL831497.1:359015-368637	q1	q2	NOTEST	0.838902	0.462731	-0.858327	0	1	1	no
ENSONIG00000001819	ENSONIG00000001819	SEMA3G	GL831166.1:863063-920200	q1	q2	NOTEST	0.164549	0.363155	1.14207	0	1	1	no
ENSONIG00000001820	ENSONIG00000001820	VSIG1	GL831223.1:976628-982162	q1	q2	NOTEST	0	0.251735	inf	0	1	1	no
ENSONIG00000001821	ENSONIG00000001821	GPR78 (1 of 2)	GL831497.1:372320-380302	q1	q2	NOTEST	0.61872	0.388553	-0.671177	0	1	1	no
ENSONIG00000001822	ENSONIG00000001822	METTL19	GL831497.1:411637-429720	q1	q2	NOTEST	1.65354	1.00399	-0.719812	0	1	1	no
ENSONIG00000001823	ENSONIG00000001823	TMLHE	GL831223.1:983414-1004119	q1	q2	NOTEST	1.44499	1.46262	0.017488	0	1	1	no
ENSONIG00000001824	ENSONIG00000001824	TNK1	GL831497.1:443988-458965	q1	q2	OK	6.94157	9.62915	0.472145	2.24059	5e-05	0.000373456	yes
ENSONIG00000001825	ENSONIG00000001825	MPP1	GL831223.1:1015317-1027973	q1	q2	OK	7.76469	10.2128	0.395386	1.80958	0.00245	0.0110294	yes
ENSONIG00000001826	ENSONIG00000001826	NAF1	GL831884.1:42893-57376	q1	q2	OK	11.8294	13.4867	0.189163	0.664606	0.25445	0.396491	no
ENSONIG00000001827	ENSONIG00000001827	PCOLCE (1 of 2)	GL831223.1:1040763-1047922	q1	q2	OK	4.29152	6.0658	0.499208	0.830131	0.11355	0.222316	no
ENSONIG00000001828	ENSONIG00000001828	CLMN	GL831232.1:2295760-2406165	q1	q2	NOTEST	0.0975501	0.0848268	-0.201623	0	1	1	no
ENSONIG00000001829	ENSONIG00000001829	USE1	GL831140.1:1050823-1059184	q1	q2	OK	7.82477	5.77485	-0.438264	-1.13652	0.053	0.126833	no
ENSONIG00000001830	ENSONIG00000001830	MYO9B (1 of 2)	GL831140.1:1069594-1115503	q1	q2	NOTEST	2.0564	2.67202	0.377809	0	1	1	no
ENSONIG00000001831	ENSONIG00000001831	-	GL831378.1:128155-130021	q1	q2	NOTEST	0.250582	0	#NAME?	0	1	1	no
ENSONIG00000001832	ENSONIG00000001832	-	GL831140.1:1125082-1126270	q1	q2	NOTEST	0.333389	0.451676	0.438083	0	1	1	no
ENSONIG00000001833	ENSONIG00000001833	NCLN	GL831140.1:1212313-1226509	q1	q2	OK	9.62467	7.81666	-0.300186	-0.777988	0.1751	0.304452	no
ENSONIG00000001834	ENSONIG00000001834	-	GL831378.1:260864-262273	q1	q2	OK	3.8216	4.6986	0.298055	0.378393	0.49215	0.628581	no
ENSONIG00000001835	ENSONIG00000001835	TMEM88 (2 of 2)	GL831223.1:1049667-1050704	q1	q2	NOTEST	4.8812	4.596	-0.0868572	0	1	1	no
ENSONIG00000001836	ENSONIG00000001836	-	GL831378.1:822722-824469	q1	q2	NOTEST	0	0.224505	inf	0	1	1	no
ENSONIG00000001837	ENSONIG00000001837	KDM6B (2 of 2)	GL831223.1:1060231-1074497	q1	q2	OK	3.82305	6.24122	0.707103	2.4932	5e-05	0.000373456	yes
ENSONIG00000001838	ENSONIG00000001838	-	GL831378.1:902741-903618	q1	q2	NOTEST	0	0.341744	inf	0	1	1	no
ENSONIG00000001839	ENSONIG00000001839	-	GL831378.1:919272-920984	q1	q2	NOTEST	0	0	0	0	1	1	no
ENSONIG00000001840	ENSONIG00000001840	-	GL831378.1:943230-962717	q1	q2	NOTEST	0	0.142277	inf	0	1	1	no
ENSONIG00000001841	ENSONIG00000001841	-	GL831166.1:966555-972482	q1	q2	NOTEST	0.854694	0.937873	0.133985	0	1	1	no
ENSONIG00000001842	ENSONIG00000001842	-	GL831223.1:1083636-1084752	q1	q2	NOTEST	0	0	0	0	1	1	no
ENSONIG00000001843	ENSONIG00000001843	NLGN2 (2 of 2)	GL831223.1:1092980-1131103	q1	q2	NOTEST	1.92651	3.42295	0.82925	0	1	1	no
ENSONIG00000001844	ENSONIG00000001844	ACTR8	GL831166.1:1020786-1028905	q1	q2	NOTEST	4.19758	3.79008	-0.147331	0	1	1	no
ENSONIG00000001845	ENSONIG00000001845	CERS1	GL831140.1:1231466-1262427	q1	q2	NOTEST	1.17378	2.05675	0.809207	0	1	1	no
ENSONIG00000001846	ENSONIG00000001846	-	GL831166.1:1020786-1028905	q1	q2	OK	23.7879	20.2676	-0.231048	-0.905378	0.114	0.222862	no
ENSONIG00000001847	ENSONIG00000001847	COPE	GL831140.1:1263834-1271834	q1	q2	OK	44.0495	45.0893	0.0336591	0.137985	0.8116	0.878512	no
ENSONIG00000001848	ENSONIG00000001848	CHDH	GL831166.1:1040954-1047599	q1	q2	NOTEST	0.258849	0.0813844	-1.66929	0	1	1	no
ENSONIG00000001849	ENSONIG00000001849	EHD4	GL831232.1:2409908-2459291	q1	q2	OK	8.838	11.7378	0.409369	2.27831	5e-05	0.000373456	yes
ENSONIG00000001850	ENSONIG00000001850	CACNA1D (2 of 2)	GL831166.1:1052840-1130784	q1	q2	NOTEST	0.390251	0.390079	-0.000635367	0	1	1	no
ENSONIG00000001851	ENSONIG00000001851	CHN1 (1 of 2)	GL831327.1:5602-30353	q1	q2	NOTEST	2.43096	3.67137	0.59479	0	1	1	no
ENSONIG00000001852	ENSONIG00000001852	TNFAIP8L1	GL831140.1:1289444-1294482	q1	q2	OK	5.63525	9.64202	0.774855	2.44163	0.00025	0.00159944	yes
ENSONIG00000001853	ENSONIG00000001853	STXBP2	GL831149.1:5577381-5586384	q1	q2	OK	20.1041	18.273	-0.137782	-0.675222	0.23925	0.382569	no
ENSONIG00000001854	ENSONIG00000001854	C19ORF10	GL831140.1:1312151-1323759	q1	q2	OK	29.5	23.9799	-0.298891	-1.74076	0.003	0.0130028	yes
ENSONIG00000001855	ENSONIG00000001855	FGF11 (2 of 2)	GL831223.1:1183860-1217114	q1	q2	NOTEST	0	0	0	0	1	1	no
ENSONIG00000001856	ENSONIG00000001856	CLDN7 (1 of 2)	GL831223.1:1235667-1239489	q1	q2	OK	66.6273	69.4547	0.0599585	0.439041	0.44665	0.586549	no
ENSONIG00000001857	ENSONIG00000001857	G2E3	GL831232.1:2462395-2477935	q1	q2	NOTEST	0.134805	0.0906281	-0.572844	0	1	1	no
ENSONIG00000001858	ENSONIG00000001858	FARP1 (2 of 2)	GL831327.1:71617-105382	q1	q2	OK	5.65419	7.23619	0.35591	1.05011	0.06805	0.152736	no
ENSONIG00000001859	ENSONIG00000001859	-	GL831140.1:1330876-1335093	q1	q2	NOTEST	0.273647	0.28448	0.0560143	0	1	1	no
ENSONIG00000001860	ENSONIG00000001860	NPM1	GL831223.1:1242837-1247804	q1	q2	OK	57.6064	66.7386	0.212292	1.2486	0.0304	0.0831965	no
ENSONIG00000001861	ENSONIG00000001861	NMRK2 (1 of 2)	GL831140.1:1341939-1345347	q1	q2	NOTEST	3.859	4.28934	0.152526	0	1	1	no
ENSONIG00000001862	ENSONIG00000001862	SCFD1	GL831232.1:2480358-2515713	q1	q2	OK	13.6162	12.429	-0.131619	-0.439812	0.4393	0.580289	no
ENSONIG00000001863	ENSONIG00000001863	-	GL831327.1:107929-115755	q1	q2	NOTEST	0.233373	0.240007	0.0404355	0	1	1	no
ENSONIG00000001864	ENSONIG00000001864	ARL13B	GL831327.1:159847-168406	q1	q2	OK	4.76111	3.01073	-0.661185	-0.881002	0.1172	0.226861	no
ENSONIG00000001865	ENSONIG00000001865	KCNIP1 (1 of 2)	GL831223.1:1250745-1259816	q1	q2	NOTEST	2.94864	0.931501	-1.66242	0	1	1	no
ENSONIG00000001866	ENSONIG00000001866	NCAM2	GL831327.1:710714-831868	q1	q2	NOTEST	0.156684	0.220953	0.495877	0	1	1	no
ENSONIG00000001867	ENSONIG00000001867	BRD4 (1 of 2)	GL831149.1:5592766-5627306	q1	q2	OK	21.8944	35.7609	0.707819	7.25558	5e-05	0.000373456	yes
ENSONIG00000001868	ENSONIG00000001868	ATCAY (1 of 2)	GL831140.1:1348088-1360739	q1	q2	NOTEST	3.72968	2.71341	-0.458943	0	1	1	no
ENSONIG00000001869	ENSONIG00000001869	HRH2 (2 of 2)	GL831223.1:1280390-1288238	q1	q2	NOTEST	0.0663975	0	#NAME?	0	1	1	no
ENSONIG00000001870	ENSONIG00000001870	-	GL831223.1:1319978-1364063	q1	q2	NOTEST	2.18409	2.32345	0.0892338	0	1	1	no
ENSONIG00000001871	ENSONIG00000001871	ZFR2	GL831140.1:1361426-1382681	q1	q2	NOTEST	3.97257	3.81152	-0.0597054	0	1	1	no
ENSONIG00000001872	ENSONIG00000001872	PCDH1 (2 of 3)	GL831223.1:1472736-1565592	q1	q2	NOTEST	0.481761	0.471516	-0.0310097	0	1	1	no
ENSONIG00000001873	ENSONIG00000001873	ROBO2 (2 of 2)	GL831223.1:1648100-1729587	q1	q2	OK	5.56526	6.27981	0.174271	0.723355	0.20265	0.337965	no
ENSONIG00000001874	ENSONIG00000001874	LPAR2 (2 of 2)	GL831149.1:5631252-5636310	q1	q2	NOTEST	0	0	0	0	1	1	no
ENSONIG00000001875	ENSONIG00000001875	PBX4 (1 of 2)	GL831149.1:5639655-5663660	q1	q2	NOTEST	4.10297	4.01308	-0.0319592	0	1	1	no
ENSONIG00000001876	ENSONIG00000001876	GART	GL831327.1:978946-992511	q1	q2	NOTEST	2.24493	1.17891	-0.929215	0	1	1	no
ENSONIG00000001877	ENSONIG00000001877	ATP13A1	GL831149.1:5669760-5680752	q1	q2	OK	6.53148	4.06355	-0.684669	-2.43316	5e-05	0.000373456	yes
ENSONIG00000001878	ENSONIG00000001878	MATK	GL831140.1:1386752-1395770	q1	q2	NOTEST	1.282	1.44204	0.169707	0	1	1	no
ENSONIG00000001879	ENSONIG00000001879	COCH	GL831232.1:2528555-2546248	q1	q2	NOTEST	0.111844	0.0286311	-1.96583	0	1	1	no
ENSONIG00000001880	ENSONIG00000001880	CHCHD5	GL831149.1:5681211-5699545	q1	q2	NOTEST	0.482916	0.0959553	-2.33134	0	1	1	no
ENSONIG00000001881	ENSONIG00000001881	-	GL831149.1:5681211-5699545	q1	q2	NOTEST	0.741858	0.505132	-0.554483	0	1	1	no
ENSONIG00000001882	ENSONIG00000001882	N6AMT1	GL831327.1:978946-992511	q1	q2	NOTEST	2.84597	0.882843	-1.68869	0	1	1	no
ENSONIG00000001883	ENSONIG00000001883	RAX2 (1 of 2)	GL831140.1:1401772-1411346	q1	q2	NOTEST	0.292805	0.376411	0.36237	0	1	1	no
ENSONIG00000001884	ENSONIG00000001884	STRN3	GL831232.1:2552774-2579674	q1	q2	NOTEST	1.11562	0.810592	-0.460793	0	1	1	no
ENSONIG00000001885	ENSONIG00000001885	GMIP	GL831149.1:5699734-5712361	q1	q2	NOTEST	0.172879	0.436966	1.33776	0	1	1	no
ENSONIG00000001886	ENSONIG00000001886	FZR1 (1 of 2)	GL831140.1:1418332-1427532	q1	q2	NOTEST	3.85804	2.69681	-0.516612	0	1	1	no
ENSONIG00000001887	ENSONIG00000001887	-	GL831327.1:1006233-1008999	q1	q2	NOTEST	0	0	0	0	1	1	no
ENSONIG00000001888	ENSONIG00000001888	-	GL831327.1:1019260-1020804	q1	q2	NOTEST	0	0	0	0	1	1	no
ENSONIG00000001889	ENSONIG00000001889	-	GL831327.1:1027244-1029796	q1	q2	NOTEST	0.0873355	0.118159	0.436094	0	1	1	no
ENSONIG00000001890	ENSONIG00000001890	-	GL831327.1:1047160-1064415	q1	q2	NOTEST	1.61742	1.70591	0.076848	0	1	1	no
ENSONIG00000001891	ENSONIG00000001891	ZNF654	GL831327.1:1070212-1087243	q1	q2	NOTEST	0.258146	0.18906	-0.449343	0	1	1	no
ENSONIG00000001892	ENSONIG00000001892	HAUS5	GL831140.1:1427571-1435539	q1	q2	NOTEST	0.303857	0.519856	0.774717	0	1	1	no
ENSONIG00000001893	ENSONIG00000001893	GLT25D1 (2 of 2)	GL831149.1:5712604-5723524	q1	q2	NOTEST	3.57685	2.69355	-0.40918	0	1	1	no
ENSONIG00000001894	ENSONIG00000001894	ROBO1 (2 of 2)	GL831223.1:1738113-1798403	q1	q2	NOTEST	0.0189887	0.0408257	1.10434	0	1	1	no
ENSONIG00000001895	ENSONIG00000001895	CBS	GL831327.1:1090033-1100714	q1	q2	OK	27.564	14.4175	-0.934966	-4.64129	5e-05	0.000373456	yes
ENSONIG00000001896	ENSONIG00000001896	AP4S1	GL831232.1:2580524-2582355	q1	q2	OK	11.5085	9.36469	-0.297399	-0.404058	0.4636	0.602642	no
ENSONIG00000001897	ENSONIG00000001897	DCP1B	GL831166.1:1135587-1146248	q1	q2	OK	5.138	6.80562	0.405521	1.20956	0.0286	0.0791313	no
ENSONIG00000001898	ENSONIG00000001898	SIN3B	GL831140.1:1436479-1452183	q1	q2	OK	4.00493	6.21323	0.633567	1.84652	0.0025	0.0112223	yes
ENSONIG00000001899	ENSONIG00000001899	HECTD1	GL831232.1:2583911-2625990	q1	q2	OK	18.9153	22.9271	0.277499	2.45053	5e-05	0.000373456	yes
ENSONIG00000001900	ENSONIG00000001900	TKT (1 of 2)	GL831166.1:1147760-1160610	q1	q2	NOTEST	0	0.102427	inf	0	1	1	no
ENSONIG00000001901	ENSONIG00000001901	PGLS	GL831149.1:5712604-5723524	q1	q2	NOTEST	3.35927	2.08221	-0.690031	0	1	1	no
ENSONIG00000001902	ENSONIG00000001902	ZNF684	GL831149.1:5725438-5729268	q1	q2	NOTEST	0.917964	0.712141	-0.366275	0	1	1	no
ENSONIG00000001903	ENSONIG00000001903	U2AF1	GL831327.1:1102346-1112766	q1	q2	OK	7.52956	5.75514	-0.387715	-0.463332	0.42745	0.569662	no
ENSONIG00000001904	ENSONIG00000001904	TRIM35 (34 of 54)	GL831149.1:5739014-5749682	q1	q2	NOTEST	0	0.0933003	inf	0	1	1	no
ENSONIG00000001905	ENSONIG00000001905	SLC27A1 (1 of 2)	GL831149.1:5739014-5749682	q1	q2	NOTEST	1.21853	0.853118	-0.514329	0	1	1	no
ENSONIG00000001906	ENSONIG00000001906	XPR1 (1 of 2)	GL831140.1:1455052-1543170	q1	q2	OK	14.803	17.8599	0.270835	2.0928	0.0003	0.00186802	yes
ENSONIG00000001907	ENSONIG00000001907	CD200 (1 of 2)	GL831327.1:1159229-1167150	q1	q2	NOTEST	0.771412	0.996711	0.369674	0	1	1	no
ENSONIG00000001908	ENSONIG00000001908	-	GL831327.1:1180922-1183605	q1	q2	NOTEST	0	0	0	0	1	1	no
ENSONIG00000001909	ENSONIG00000001909	-	GL831327.1:1185791-1188570	q1	q2	NOTEST	0	0	0	0	1	1	no
ENSONIG00000001910	ENSONIG00000001910	-	GL831327.1:1192859-1194466	q1	q2	NOTEST	0	0	0	0	1	1	no
ENSONIG00000001911	ENSONIG00000001911	-	GL831327.1:1272650-1282029	q1	q2	NOTEST	0	0	0	0	1	1	no
ENSONIG00000001912	ENSONIG00000001912	NSUN5	GL831166.1:1167696-1170485	q1	q2	OK	13.6456	6.32613	-1.10904	-2.6087	5e-05	0.000373456	yes
ENSONIG00000001913	ENSONIG00000001913	ACBD6	GL831140.1:1545789-1577139	q1	q2	NOTEST	3.59961	3.487	-0.045854	0	1	1	no
ENSONIG00000001914	ENSONIG00000001914	CD97 (1 of 2)	GL831149.1:5769382-5773963	q1	q2	NOTEST	0.974706	1.48583	0.608228	0	1	1	no
ENSONIG00000001915	ENSONIG00000001915	SGK2	GL831166.1:1187587-1202172	q1	q2	NOTEST	0.309663	0	#NAME?	0	1	1	no
ENSONIG00000001916	ENSONIG00000001916	PPM1D (2 of 2)	GL831223.1:1836538-1846734	q1	q2	NOTEST	3.12281	3.44545	0.141848	0	1	1	no
ENSONIG00000001917	ENSONIG00000001917	LHX4	GL831140.1:1583896-1595122	q1	q2	OK	28.9952	24.8621	-0.221865	-1.60676	0.00495	0.0195913	yes
ENSONIG00000001918	ENSONIG00000001918	HEATR5A	GL831232.1:2638818-2694108	q1	q2	NOTEST	0.617159	0.746216	0.27395	0	1	1	no
ENSONIG00000001919	ENSONIG00000001919	-	GL831223.1:1863269-1869150	q1	q2	NOTEST	0	0	0	0	1	1	no
ENSONIG00000001920	ENSONIG00000001920	LPHN1 (1 of 2)	GL831149.1:5835820-5926234	q1	q2	NOTEST	0.538128	0.356424	-0.594355	0	1	1	no
ENSONIG00000001921	ENSONIG00000001921	QSOX1	GL831140.1:1602736-1627461	q1	q2	OK	7.20439	7.76706	0.108492	0.289304	0.60245	0.722977	no
ENSONIG00000001922	ENSONIG00000001922	ACACA	GL831223.1:1871361-1903051	q1	q2	OK	4.69453	5.17285	0.13998	0.630976	0.27315	0.418068	no
ENSONIG00000001923	ENSONIG00000001923	L3MBTL1	GL831166.1:1205824-1214424	q1	q2	NOTEST	1.95909	1.16677	-0.747668	0	1	1	no
ENSONIG00000001924	ENSONIG00000001924	CEP350	GL831140.1:1628950-1660412	q1	q2	NOTEST	3.66065	4.49614	0.296587	0	1	1	no
ENSONIG00000001925	ENSONIG00000001925	SRSF6 (1 of 2)	GL831166.1:1223878-1227547	q1	q2	OK	15.5888	13.3829	-0.220118	-0.562276	0.3307	0.47756	no
ENSONIG00000001926	ENSONIG00000001926	-	GL831149.1:5949814-5964144	q1	q2	OK	3.5574	5.70374	0.681086	0.841854	0.1143	0.22324	no
ENSONIG00000001927	ENSONIG00000001927	EIF2S2	GL831166.1:1228976-1233920	q1	q2	OK	108.175	74.1546	-0.544754	-5.69689	5e-05	0.000373456	yes
ENSONIG00000001928	ENSONIG00000001928	CACNA1E (1 of 2)	GL831140.1:1717660-1783563	q1	q2	OK	9.06971	12.1441	0.421126	2.50669	5e-05	0.000373456	yes
ENSONIG00000001929	ENSONIG00000001929	-	GL831327.1:1297119-1301769	q1	q2	NOTEST	0.0954464	0	#NAME?	0	1	1	no
ENSONIG00000001930	ENSONIG00000001930	-	GL831149.1:5980764-5983772	q1	q2	NOTEST	0.1112	0.111688	0.00631778	0	1	1	no
ENSONIG00000001931	ENSONIG00000001931	TMED1 (2 of 2)	GL831149.1:5988203-5991442	q1	q2	NOTEST	0	0.36419	inf	0	1	1	no
ENSONIG00000001932	ENSONIG00000001932	CHMP4B (1 of 2)	GL831166.1:1238324-1242741	q1	q2	OK	52.7777	66.7103	0.337983	1.33029	0.0216	0.0637758	no
ENSONIG00000001933	ENSONIG00000001933	DNM2 (2 of 2)	GL831149.1:5994355-6023857	q1	q2	OK	7.44732	6.55131	-0.184938	-0.671337	0.2483	0.390645	no
ENSONIG00000001934	ENSONIG00000001934	VAPB (1 of 2)	GL831166.1:1245243-1252171	q1	q2	OK	10.0964	7.43775	-0.440907	-0.666737	0.23055	0.372526	no
ENSONIG00000001935	ENSONIG00000001935	-	GL831513.1:174319-175417	q1	q2	NOTEST	0	0	0	0	1	1	no
ENSONIG00000001936	ENSONIG00000001936	-	GL831327.1:1325579-1326781	q1	q2	NOTEST	0	0	0	0	1	1	no
ENSONIG00000001937	ENSONIG00000001937	-	GL831513.1:242199-243231	q1	q2	NOTEST	0	0	0	0	1	1	no
ENSONIG00000001938	ENSONIG00000001938	-	GL831513.1:250943-253130	q1	q2	NOTEST	0	0	0	0	1	1	no
ENSONIG00000001939	ENSONIG00000001939	-	GL831327.1:1354262-1365537	q1	q2	NOTEST	0.0258238	0	#NAME?	0	1	1	no
ENSONIG00000001940	ENSONIG00000001940	-	GL831513.1:261179-261953	q1	q2	NOTEST	0	0	0	0	1	1	no
ENSONIG00000001941	ENSONIG00000001941	-	GL831513.1:266244-270389	q1	q2	NOTEST	0	0	0	0	1	1	no
ENSONIG00000001942	ENSONIG00000001942	-	GL831513.1:366673-367916	q1	q2	NOTEST	0	0	0	0	1	1	no
ENSONIG00000001943	ENSONIG00000001943	-	GL831166.1:1255776-1280402	q1	q2	NOTEST	3.36001	3.43887	0.0334672	0	1	1	no
ENSONIG00000001944	ENSONIG00000001944	-	GL831166.1:1287884-1328390	q1	q2	NOTEST	0.984654	1.3609	0.46687	0	1	1	no
ENSONIG00000001945	ENSONIG00000001945	QTRT1	GL831149.1:6024382-6028958	q1	q2	NOTEST	1.13374	1.72239	0.603319	0	1	1	no
ENSONIG00000001946	ENSONIG00000001946	KCNT2	GL831149.1:6030985-6071875	q1	q2	OK	17.4356	18.0284	0.0482311	0.271253	0.63915	0.755425	no
ENSONIG00000001947	ENSONIG00000001947	ATP5EP2	GL831166.1:1287884-1328390	q1	q2	OK	119.97	145.607	0.279414	0.764768	0.18165	0.312814	no
ENSONIG00000001948	ENSONIG00000001948	-	GL831223.1:1915819-1919152	q1	q2	NOTEST	0	0	0	0	1	1	no
ENSONIG00000001949	ENSONIG00000001949	SLMO2	GL831166.1:1331299-1334038	q1	q2	OK	11.8505	31.7606	1.42229	3.44146	5e-05	0.000373456	yes
ENSONIG00000001950	ENSONIG00000001950	SEZ6 (1 of 2)	GL831223.1:1952059-2042542	q1	q2	NOTEST	2.54206	1.85654	-0.453386	0	1	1	no
ENSONIG00000001951	ENSONIG00000001951	-	GL831166.1:1337709-1342963	q1	q2	NOTEST	1.38556	0.453737	-1.61054	0	1	1	no
ENSONIG00000001952	ENSONIG00000001952	TRIM35 (1 of 54)	GL831149.1:6076919-6080773	q1	q2	NOTEST	0.0823828	0.107484	0.383705	0	1	1	no
ENSONIG00000001953	ENSONIG00000001953	-	GL831140.1:1792876-1816832	q1	q2	NOTEST	1.07762	0.924338	-0.221354	0	1	1	no
ENSONIG00000001954	ENSONIG00000001954	REXO2	GL831515.1:2168-13208	q1	q2	OK	12.315	13.6575	0.149279	0.269932	0.63025	0.747575	no
ENSONIG00000001955	ENSONIG00000001955	MYO18A (2 of 2)	GL831223.1:2076069-2129714	q1	q2	NOTEST	0.236241	0.323186	0.452104	0	1	1	no
ENSONIG00000001956	ENSONIG00000001956	SLC32A1 (2 of 2)	GL831166.1:1343659-1347864	q1	q2	NOTEST	0.0530559	0	#NAME?	0	1	1	no
ENSONIG00000001957	ENSONIG00000001957	ACTR5	GL831166.1:1355747-1361262	q1	q2	NOTEST	1.70781	0.808721	-1.07843	0	1	1	no
ENSONIG00000001958	ENSONIG00000001958	GIPC1	GL831149.1:6081612-6087923	q1	q2	NOTEST	2.89304	2.23827	-0.370202	0	1	1	no
ENSONIG00000001959	ENSONIG00000001959	DNAJB1 (1 of 2)	GL831149.1:6092745-6095180	q1	q2	OK	8.95952	10.2745	0.197578	0.484187	0.3848	0.529426	no
ENSONIG00000001960	ENSONIG00000001960	CLMP (2 of 2)	GL831515.1:94211-163355	q1	q2	NOTEST	0.136402	0.0447761	-1.60706	0	1	1	no
ENSONIG00000001961	ENSONIG00000001961	SHMT2 (2 of 3)	GL831166.1:1379754-1388267	q1	q2	NOTEST	0.0473462	0.0977291	1.04554	0	1	1	no
ENSONIG00000001962	ENSONIG00000001962	TECR (2 of 2)	GL831149.1:6097449-6112928	q1	q2	NOTEST	0.0953474	0.0628965	-0.600213	0	1	1	no
ENSONIG00000001963	ENSONIG00000001963	SOAT1	GL831140.1:1820303-1828472	q1	q2	OK	5.90264	6.92722	0.230917	0.792924	0.16535	0.291611	no
ENSONIG00000001964	ENSONIG00000001964	VEZF1 (1 of 2)	GL831223.1:2134605-2146183	q1	q2	OK	4.56317	5.87567	0.364715	0.715681	0.20735	0.343616	no
ENSONIG00000001965	ENSONIG00000001965	-	GL832045.1:3198-4526	q1	q2	NOTEST	0	0	0	0	1	1	no
ENSONIG00000001966	ENSONIG00000001966	KSR1 (1 of 2)	GL831223.1:2155566-2182947	q1	q2	OK	8.96131	14.6731	0.711388	3.55485	5e-05	0.000373456	yes
ENSONIG00000001967	ENSONIG00000001967	-	AERX01077096.1:431-1013	q1	q2	NOTEST	0	0	0	0	1	1	no
ENSONIG00000001968	ENSONIG00000001968	-	AERX01073197.2:2237-5224	q1	q2	NOTEST	0	0	0	0	1	1	no
ENSONIG00000001969	ENSONIG00000001969	SAMD1 (1 of 2)	GL831149.1:6097449-6112928	q1	q2	NOTEST	0.419649	0.542825	0.371306	0	1	1	no
ENSONIG00000001970	ENSONIG00000001970	-	GL831149.1:6119735-6125850	q1	q2	NOTEST	1.65429	2.75826	0.737549	0	1	1	no
ENSONIG00000001971	ENSONIG00000001971	OMG	GL831223.1:2191744-2195680	q1	q2	NOTEST	0	0.0962493	inf	0	1	1	no
ENSONIG00000001972	ENSONIG00000001972	-	GL831223.1:2204592-2367001	q1	q2	NOTEST	0.224807	1.90455	3.08269	0	1	1	no
ENSONIG00000001973	ENSONIG00000001973	KIAA1199 (2 of 2)	GL831223.1:2376321-2543331	q1	q2	NOTEST	0.0551724	0.0249667	-1.14394	0	1	1	no
ENSONIG00000001974	ENSONIG00000001974	ABL2	GL831140.1:1829039-1851963	q1	q2	NOTEST	1.63027	2.36092	0.534232	0	1	1	no
ENSONIG00000001975	ENSONIG00000001975	STAC3	GL831166.1:1404498-1412792	q1	q2	NOTEST	0.0823828	0.173426	1.07391	0	1	1	no
ENSONIG00000001976	ENSONIG00000001976	FAM108C1	GL831223.1:2570316-2607556	q1	q2	NOTEST	3.8804	3.08062	-0.332982	0	1	1	no
ENSONIG00000001977	ENSONIG00000001977	KIF5A (1 of 2)	GL831166.1:1432137-1448383	q1	q2	OK	18.299	17.427	-0.0704482	-0.365451	0.5234	0.656871	no
ENSONIG00000001978	ENSONIG00000001978	ARNT2	GL831223.1:2640967-2733959	q1	q2	OK	4.76971	4.34261	-0.135336	-0.297935	0.6019	0.722977	no
ENSONIG00000001979	ENSONIG00000001979	OSBPL9	GL831140.1:1857212-1894602	q1	q2	OK	33.9885	47.7733	0.491158	4.41756	5e-05	0.000373456	yes
ENSONIG00000001980	ENSONIG00000001980	ASF1B	GL831149.1:6137959-6141502	q1	q2	NOTEST	2.91244	2.15782	-0.432651	0	1	1	no
ENSONIG00000001981	ENSONIG00000001981	-	GL831149.1:6153925-6156927	q1	q2	NOTEST	2.90081	2.46551	-0.234573	0	1	1	no
ENSONIG00000001982	ENSONIG00000001982	TRIM35 (51 of 54)	GL831149.1:6157770-6162091	q1	q2	NOTEST	0.147012	0.53184	1.85506	0	1	1	no
[truncated: 20,301 more rows]
